1 **Adverse effects of *Bacillus thuringiensis* bioinsecticide on non-target *Drosophila* species**

2 Aurélie **Babin**, Marie-Paule **Nawrot-Esposito**, Armel **Gallet**, Jean-Luc **Gatti**<sup>S\*</sup>, Marylène **Poirié**<sup>S</sup>

3

4 Université Côte d'Azur, INRA, CNRS, ISA, France

5

6 **\*Corresponding author**

7 Institut Sophia Agrobiotech, INRA, 400 route des chappes, 06903 Sophia Antipolis, France.

8 E-mail : jean-luc.gatti@inra.fr

9

10 <sup>S</sup>**Last co-authors**

11

12 **Running title: Unintentional impact of *Bt* on *Drosophila* species**

13

14 **Keywords:** *Drosophila*, *Bacillus thuringiensis*, biopesticide, toxicity, non-intentional effects,  
15 development, fitness, longevity, offspring number, ecotoxicology

16

17 **Word count (main text): 6 687**

18 **Figures:** 7 figures and 1 table

19 **Supplementary information**

20 **Abstract**

21 Biopesticides based on *Bacillus thuringiensis kurstaki* (*Btk*) and *israelensis* (*Bti*) spores and toxins  
22 are widely used to control insect pests, increasing environmental risks to non-target biodiversity.  
23 Here, we tested for potential effects of larval ingestion of *Bt* commercial formulations on  
24 *Drosophila* species. Doses equivalent to those recommended for field application ( $\leq 10^6$  CFU/g of  
25 fly medium) had no effect whereas *Btk* doses 10 to 100-fold higher ( $10^7$ - $10^8$  CFU/g) altered the  
26 development (decreased emergence due to larval mortality and increased development time), and  
27 moderately influenced adult fitness-related traits. At the highest *Btk* and *Bti* dose ( $10^9$  CFU/g), all  
28 larvae died before pupation. The impact of *Btk* formulations resulted from the spores/cleaved toxins  
29 synergy, but also additives. While recommended doses had no effect on non-target *Drosophila*  
30 species, the accumulation of *Bt* bioinsecticides in the environment could have adverse side-effects  
31 on the populations of these species and therefore their associated communities.

## 32 **Introduction**

33 The world's population is expected to reach more than 9 billion people by 2050 (United Nations,  
34 2015), increasing the demand for agricultural resources in the future. Increasing agricultural  
35 production requires improved management of pests, especially insects that cause more than 30% of  
36 losses (Pimentel and Burgess, 2014). Nowadays, their management still largely relies on  
37 conventional chemical insecticides. However, their use and efficiency have been considerably  
38 reduced due to the emergence of pests' resistance, development of secondary pests, adverse side-  
39 effects on non-target species (natural enemies of pests, pollinators) (Devine and Furlong, 2007;  
40 Sanchis and Bourguet, 2008), and more generally the impacts on biodiversity and human health (e.g.  
41 neurological disorders, functional impairment of reproduction, cancers) (WHO Report, 2007; Baldi  
42 et al. 2013; Gilden et al. 2016; Rizzati et al. 2016). Developed as an alternative, biopesticides are  
43 considered more specific and safer for the environment and human health. Today, they still  
44 represent less than 5% of the pesticide market, the large majority being microbial insecticide  
45 formulations based on viable spores and toxins of *Bacillus thuringiensis* (*Bt*) (over 400 registered  
46 formulations) (Sanchis and Bourguet, 2008; Lacey et al. 2015).

47 *Bt* is a Gram-positive endospore-forming bacterium that synthesizes a wide range of toxins  
48 with different chemical structures, modes of action and biological targets. The most abundant and  
49 studied are Cry  $\delta$ -endotoxins encoded by genes located on large plasmids and produced as  
50 parasporal crystalline inclusions during the stationary growth phase (Crickmore 2017, Adang et al.  
51 2014). *Bt* produces other insecticidal toxins, the Cyt (cytolytic  $\delta$ -endotoxins) and Vip (secreted  
52 Vegetative Insecticidal Proteins) that synergize their effects with Cry toxins, virulence factors such  
53 as  $\beta$ -exotoxins (or thuringiensin), a secreted nucleotide toxic for almost all tested life forms thus  
54 prohibited in commercial formulations (WHO Report, 1999), and anti-fungal factors (Bravo et al.  
55 2017; Rabinovitch et al. 2017). *Bt* subspecies and strains can differ in their plasmid number and in  
56 the synthesized toxins cocktail responsible for their biological activity, which was used to delineate  
57 potential target insects (Palma et al. 2014). For instance, *Bt* subsp. *kurstaki* (*Btk*) produces the 5 Cry

58 toxins, Cry1Aa, Cry1Ab, Cry1Ac, Cry2Aa and Cry2Ab (Ben-Dov et al. 1997; Adang et al. 2014),  
59 while *Bt* subsp. *israelensis* (*Bti*) produces a combination of Cry4Aa, Cry4Ba, Cry10Aa, and  
60 Cry11Aa (Ben-Dov et al. 1999; Berry et al. 2002), both strains being commercially used. The  
61 different toxin cocktails produced by some *Bt* subspecies can also be harmful to non-insect  
62 organisms such as nematodes and protozoa (Palma et al. 2014).

63 The formulations based on spores and toxin crystals of *Btk* and *Bti* are the most sprayed in  
64 organic farming and natural areas (e.g. forests, swamps) to deal with larvae of Lepidopteran pests  
65 and Dipteran larvae of mosquitoes and black flies, respectively. It is generally accepted that once  
66 ingested by insect larvae, the toxin crystals are dissolved by the midgut alkaline pH, releasing ~130  
67 kDa pro-toxins that are then processed by digestive proteases into smaller, soluble, active toxin  
68 fragments of ~ 60-70 kDa (Bravo et al. 2007; Wei et al. 2016). Active toxins bind to specific  
69 receptors of midgut epithelial cells, eliciting pores formation in the cell membrane, cell lysis and  
70 gut epithelium disorganization (Schnepf et al. 1998; Bravo et al. 2011). This allows gut bacteria,  
71 including *Bt*, to colonize the hemocoel, and leads to rapid septicaemia and death (Obata et al. 2009;  
72 Caccia et al. 2016).

73 The increasing use of *Bt* has recently raised concern about its potential impact on non-target  
74 species. Numerous impact studies of field application rates and acute intoxications have concluded  
75 that *Bt* is safe or has a limited impact on non-target vertebrates and invertebrates, and associated  
76 species communities (Glare and O'Callaghan, 2000). Yet, there is growing evidence of direct and  
77 indirect cross-effects of *Bt* formulations and toxins across insect species and orders, or even across  
78 phyla, suggesting that *Bt* targeting is only partly specific (van Frankenhuyzen 2017; Venter and  
79 Bøhn, 2016). In addition, data showed that almost all of the *Btk* was still present on the leaves  
80 surface 72 hours after spraying (Bizzarri and Bishop, 2008), its amount returning close to  
81 environmental levels only 28 days after treatment (Raymond et al. 2010). Finally, *Bt* spores can  
82 survive in the soil and different supports for months and even years after application (Hendriksen et  
83 al. 2002; Duchet et al. 2014; Hung et al. 2016a, b; Enger et al. 2018). *Bt* formulations contain also

84 numerous compounds to protect spores and crystals and aggregate them into a wettable form,  
85 surfactants to facilitate spraying and dispersion on plants, and phagostimulants (Couch, 2000; Brar  
86 et al. 2006). Nevertheless, spores and toxins are somewhat sensitive to biotic and abiotic conditions  
87 (e.g. UV, pH, rainfall), which requires frequent applications to achieve the required pest control  
88 level (Brar et al. 2006). All this can lead to *Bt* accumulation in the environment, thus raising the  
89 rarely addressed issue of potential side-effects of chronic exposure (*i.e.* continuous and increasing  
90 exposure for an extended period) of non-target species to doses unexpectedly above the  
91 recommended application rates.

92       Diptera are worldwide distributed insects, most of which are not targets for *Bt* and its toxins.  
93 This is the case of the genus *Drosophila*, represented by ~ 1500 described species (Bächli, 1999-  
94 2008), including the model organism *D. melanogaster*. In the field, most of these flies feed and  
95 reproduce mainly on ripening or rotting fruits and are therefore present in areas treated with *Bt* such  
96 as orchards, vineyards and gardening areas. Unable to disperse between food patches, early stages  
97 of *Drosophila* larvae eat intensively and grow exponentially (Tennessee and Thumel, 2011), and  
98 may thus ingest high doses of *Bt* bioinsecticides. Surprisingly, few studies have focused on  
99 *Drosophila* species (Benz and Perron, 1967; Saadoun et al. 2001; Khyami-Horani 2002; Obeidat  
100 2008; Obeidat et al. 2012; Cossentine et al. 2016; Biganski et al. 2017; Haller et al. 2017) and most  
101 of them showed susceptibility of these species to *Btk*. However, definitive conclusions were  
102 difficult to draw since most of these studies used mainly late 3<sup>rd</sup> instar larvae preparing for pupation,  
103 *i.e.* when they feed much less than younger larvae, and the tested *Bt* preparations possibly contain  
104 highly toxic  $\beta$ -exotoxins, especially in the case of field isolates.

105       Here, we have tested the dose-dependent chronic side-effects of different commercial  
106 formulations of *Btk* (devoid of  $\beta$ -exotoxins) and, to a lesser extent of *Bti*, on the wild-type *D.*  
107 *melanogaster* Canton S, with a focus on developmental traits (developmental time, emergence rate).  
108 The spore-forming Gram-positive *Bacillus subtilis* and the *Btk* strain (4D22), devoid of Cry toxin  
109 genes and thus of crystals, were used as non-pathogenic controls. We also analysed two fitness-

110 related traits of adult flies (male and female longevity, offspring number) after entire development  
111 in presence of *Btk* formulation. To test for effects specific to the fly genetic background,  
112 developmental traits upon exposure to *Btk* formulation were also measured on several other *D.*  
113 *melanogaster* strains. Finally, we extended further these development experiments to several other  
114 *Drosophila* species, including cosmopolitan species and the invasive *D. suzukii*, which are  
115 frequently present in *Bt* treated areas, to explore the potential implications of chronic exposure to  
116 *Btk* formulation in terms of competition and associated communities.

117

## 118 **Results**

### 119 ***Btk* formulations adversely impact the development of *D. melanogaster*.**

120 The wild-type Canton S strain of *D. melanogaster* was used to evaluate the dose-dependent effect  
121 of the commercial *Btk* formulation Delfin<sup>®</sup> A on the emergence rate (ER, proportion of emerged  
122 flies from the initial egg pool) and developmental time (DT, mean number of days from egg to adult  
123 emergence). Eggs were transferred on a standard low-protein/high-sugar fly medium containing  
124 Delfin<sup>®</sup> A at doses ranging from  $5 \times 10^5$  CFU/g of medium (mean equivalent of the maximum  
125 recommended doses for field application; see Methods and Supplementary information S1) to  $10^9$   
126 CFU/g (~ 1,000 times the recommended dose). To check for specific effects of *Btk* formulations  
127 and the respective role of *Btk* spores and Cry toxins, we tested the same dose range of the  
128 commercial *Bti* formulation Vectobac<sup>®</sup> targeting mosquitoes that contains different Cry toxins  
129 (Bravo et al. 2011), of the Cry-free strain *Btk* 4D22, and of the *Drosophila* non-pathogenic spore-  
130 forming *Bacillus subtilis*.

131 Developmental traits (ER and DT) of exposed and non-exposed control flies were similar at  
132 doses up to  $10^7$  CFU/g of Delfin<sup>®</sup> A (Fig. 1a-b; Table 1). At higher doses, both ER and DT were  
133 affected in a dose-dependent manner: ER was reduced by 17% at  $5 \times 10^7$  CFU/g (although not  
134 statistically significant), up to 100% at  $10^9$  CFU/g, dose at which no individual reached the pupal  
135 stage. The lethal dose 50 (LD50) was estimated between  $5 \times 10^7$  and  $10^8$  CFU/g (Fig. 1a). DT was

136 increased of about 0.5 day at  $5 \times 10^7$  CFU/g (+4% compared to controls), up to 1.5 days (+14%) at  
137  $10^8$  CFU/g (Fig. 1b; Table 1). The sex-ratio at emergence (SR, proportion of males) was strongly  
138 biased towards males at the highest dose at which complete development occurred ( $10^8$  CFU/g),  
139 with 58% more males compared to controls (Supplementary information S2). Because addition of  
140 *Btk* formulation could modify parameters of the fly medium and thus contribute to these effects, we  
141 checked the pH of the dose-responses medium. The presence or dose of the formulation had no  
142 effect (Supplementary information S4).

143 We observed no change in ER using the same dose range of the *Btk* Cry-free strain 4D22 (Fig.  
144 1a, 1e; Table 1) and the non-pathogenic *Bacillus subtilis* (Fig. 1a, Table 1). Addition of *Bti*  
145 Vectobac<sup>®</sup> did not affect ER up to  $10^8$  CFU/g but reduced it by 89% at  $10^9$  CFU/g (~2,000 times the  
146 highest recommended dose for field application; Fig. 1a; Table 1; Supplementary information S1).  
147 DT varied with the dose of *Btk* 4D22, mainly due to differences between doses other than the  
148 control. DT increased by ~1.5 days at the highest dose of Vectobac<sup>®</sup> (Fig. 1b; Table 1) and showed  
149 a similar trend with *B. subtilis* ( $p = 0.06$ ; Fig. 1b; Table 1). None of these three treatments  
150 influenced dramatically the SR, the slight decrease in male proportion for most of the Vectobac<sup>®</sup>  
151 doses being due to the higher average sex-ratio for the control dose compared to those for the two  
152 other treatments (Supplementary information S2).

153 To test whether these effects are generic to *Btk* formulations, the fly development was  
154 evaluated on two other formulations, Delfin<sup>®</sup> B (same brand) and Scutello DF (brand Dipel<sup>®</sup>), at the  
155 critical doses  $10^8$  and  $10^9$  CFU/g. As Delfin<sup>®</sup> A, these formulations contain spores and Cry toxins  
156 such as Cry-1A as pro-toxins of ~130 kDa, activated toxins of ~60-70 kDa, but also as smaller  
157 fragments (Wei et al. 2016; Fig. 1e, red asterisks). ER remained unchanged at  $10^8$  CFU/g whereas  
158 no individual reached pupation at  $10^9$  CFU/g on Delfin<sup>®</sup> B and very few individuals reached the  
159 adult stage on Scutello DF<sup>®</sup>, DT being increased by more than 2 days (Fig. 1c-d; Table 1). No  
160 significant bias in SR was observed for either formulation (Supplementary information S2).

161

162 **Adverse effects of *Btk* formulation strongly impact the early development.**

163 Larval stages were tested for their susceptibility to *Btk* formulation in two independent and  
164 complementary dose-response tests of survival on Delfin<sup>®</sup> A, at doses ranging from  $10^5$  to  $10^9$   
165 CFU/g of high protein/sugar free medium (this medium is used to rear fly species which are  
166 difficult to rear in the lab (see below) and is less limiting for the development of early larval stages).  
167 We focused on the 1<sup>st</sup> and 2<sup>nd</sup> larval instars, during which growth is exponential (Tennessee and  
168 Thummel 2011), so that larvae are most heavily exposed to the bioinsecticide. In the first test, the  
169 cumulative survival was measured by counting late 1st and 2nd instar larvae alive which have been  
170 exposed to Delfin<sup>®</sup> A from the egg stage. Larval survival was not influenced at  $10^7$  CFU/g, whereas  
171 it decreased for both larval instars above that dose to reach up to 37% mortality at  $10^9$  CFU/g (Fig.  
172 2a). Reduced survival tended to occur at a lower dose when cumulative survival was measured later  
173 in the development, *i.e.*  $10^9$  for late 1<sup>st</sup> instar larvae and  $10^8$  CFU/g for 2<sup>nd</sup> instar larvae (Fig. 2a;  
174 Table 1). For both instars, larvae surviving  $10^9$  CFU/g were noticeably smaller and less active than  
175 those surviving lower doses. In emergence assays with planned exposure from the egg to the adult  
176 stage, none of these individuals reached the pupal stage (see results above). In the second test, larval  
177 survival was measured after early 1<sup>st</sup> and 2<sup>nd</sup> instar larvae had been exposed for 24 hours to Delfin<sup>®</sup>  
178 A. Survival of 1<sup>st</sup> instar larvae decreased by 36% on  $10^9$  CFU/g whereas that of 2<sup>nd</sup> instar larvae did  
179 not change (Fig. 2b, Table 1).

180

181 **Developmental exposure to *Btk* formulation does not strongly influence fitness-related traits**  
182 **in adults.**

183 Long-term consequences on flies of exposure to *Btk* formulation throughout the development were  
184 evaluated on two fitness-related traits, longevity and total offspring number. Traits were measured  
185 on a *Btk*-free low-protein/high-sugar medium after individuals had completed their development on  
186 the same fly medium but in presence of selected doses of Delfin<sup>®</sup> A:  $5 \times 10^6$  CFU/g, which had no  
187 impact on development, and  $5 \times 10^7$  and  $10^8$  CFU/g, which caused moderate and strong



188 developmental alterations, respectively (see Fig. 1a).

189 Adult longevity was analysed in two independent experiments on groups of 15 females and 15  
190 males held together. Despite large variation between experiments (Table 1), the longevity of adults  
191 reared on  $5 \times 10^6$  CFU/g of Delfin<sup>®</sup> A was similar to that of non-exposed controls (Fig. 3). Males  
192 and females which developed on the two higher doses showed a moderate longevity benefit, higher  
193 in females for  $10^8$  CFU/g (Fig. 3a-b, d-e; Table 1). Males generally survived better than females  
194 (Table 1) but their longevity benefit of developing on  $10^8$  CFU/g was only observed in the second  
195 experiment (Fig. 3b, e).

196 The female offspring number - the sum of offspring produced by the 15 females of each fly  
197 group during the longevity experiment - varied depending on both the experiment and the Delfin<sup>®</sup> A  
198 dose (Table 1). In the 1<sup>st</sup> experiment, adults from larvae reared on  $10^8$  CFU/g had fewer offspring  
199 compared to control adults and to adults developed on the other doses whereas the total offspring  
200 number varied regardless of the *Btk* dose in the 2<sup>nd</sup> experiment (Fig. 3c, f, Table 1).

201

202 ***Btk*-formulation dose-dependent alterations of development are not specific to the *D.***  
203 ***melanogaster* strain.**

204 Dose-dependent effects of *Btk* formulation on the development were tested on three additional *D.*  
205 *melanogaster* strains: the wild-type Nasrallah (strain 1333), the wild-type Sefra population reared in  
206 the laboratory for 4 years, and the double mutant YW1118. The emergence rates (ER) and  
207 developmental times (DT) were measured on a high-protein/sugar-free medium (rearing medium of  
208 these strains) mixed with Delfin<sup>®</sup> A doses ranging from  $10^5$  to  $10^9$  CFU/g. To allow the comparison  
209 with previous results with Canton S flies on low-protein/high sugar fly medium, Canton S was also  
210 reared and tested on the high-protein/sugar-free medium along with the other strains.

211 None of the fly strains was impacted at doses up to  $10^7$  CFU/g, whereas ER was strongly reduced  
212 and DT was increased at higher doses for all the strains (Fig. 4a-b, Table 1), with no individual  
213 reaching the pupal stage at  $10^9$  CFU/g (LD50 between  $10^8$  and  $10^9$  CFU/g). At  $10^8$  CFU/g, the

214 magnitude of effects on Canton S flies was lower than that observed on the low-protein/high-sugar  
215 medium. At this dose, ER varied between strains, the largest reduction being observed for Sefra  
216 (Table 1). We observed no dose-dependent bias in SR (Supplementary information S3).

217

### 218 ***Btk* formulation also affects other *Drosophila* species.**

219 The ER and DT were analysed for seven other *Drosophila* species from different phylogenetic  
220 clades at doses of Delfin<sup>®</sup> A from 10<sup>5</sup> to 10<sup>9</sup> CFU/g of high-protein/sugar-free medium (rearing  
221 medium of all the species). Tested species were *D. simulans* (*D. melanogaster* sister species), the  
222 African *D. yakuba*, *D. subobscura*, *D. immigrans*, *D. hydei*, and the invasive *D. sukukii*, all  
223 belonging to the *Drosophila* subgenus, and *D. busckii* from the *Dorsilopha* subgenus. For all the  
224 species, doses up to 10<sup>6</sup> CFU/g of Delfin<sup>®</sup> A had no effect on ER and DT whereas all individuals  
225 failed to reach the pupal stage and no fly emerged at 10<sup>9</sup> CFU/g (Fig. 5-6). Amplitudes of  
226 development alterations at 10<sup>7</sup> and 10<sup>8</sup> CFU/g varied between species (Fig. 5-6; Table 1). All  
227 species were affected at 10<sup>8</sup> CFU/g as was *D. melanogaster* (see Fig. 4a for comparison). *D.*  
228 *simulans* and *D. busckii* had unchanged ER, but DT was slightly increased for *D. simulans*  
229 (although slightly reduced at 10<sup>7</sup> CFU/g; similar results with a Japanese strain, data not shown) and  
230 strongly increased for *D. busckii* (by 20%, *i.e.* ~ 4 days) (Fig. 5-6, Table 1). *D. yakuba* ER and DT  
231 were similar to those of *D. melanogaster*, with an LD50 around 10<sup>8</sup> CFU/g and a moderate DT  
232 increase of ~ 1 day (Fig. 5-6, Table 1; similar results with a strain from Sweden, data not shown).  
233 The ER of *D. hydei* and *D. subobscura* were very low at 10<sup>8</sup> CFU/g (LD50 below this dose), with a  
234 high DT (Fig. 5-6; Table 1), while *D. immigrans* did not survive. No *D. sukukii* individual emerged  
235 at 10<sup>8</sup> CFU/g and development was already moderately impacted at 10<sup>7</sup> CFU/g (Fig. 5-6). No dose-  
236 dependent bias in SR was detected for either species (Supplementary information S5).

237

### 238 **Development alterations may result from a synergy between formulation components.**

239 *Bt* spores and toxins can represent more than half the weight of commercial formulations, with up to

240 about 10% of insecticidal protein toxins within this fraction, mainly Cry pro-toxins and activated  
241 toxins (see Fig. 1e) (Koch et al. 2015). The remaining weight consists of various compounds such  
242 as residues of culture medium and various additives including surfactant, anti-foaming agents, etc.  
243 (Glare and O'Callaghan, 2000; Brar et al. 2006). Indeed it has been shown for some products that  
244 additives can be more harmful in some cases than the active ingredient (Bradberry et al. 2004), we  
245 explored the role of small diffusible molecular weight components of Delfin<sup>®</sup> A in the alterations of  
246 ER and DT of *D. melanogaster* Canton S. For that, we mixed a 10 kDa dialyzed suspension of  
247 Delfin<sup>®</sup> A at 10<sup>7</sup>, 10<sup>8</sup>, and 10<sup>9</sup> CFU/g with low-protein/high-sugar medium. ER and DT were  
248 unaffected by the presence of the dialyzed suspension from the 10<sup>7</sup> CFU/g dose, whereas no  
249 individual reached the adult stage (no pupation) with the suspension from the 10<sup>9</sup> CFU/g dose (Fig.  
250 7a; Table 1). At 10<sup>8</sup> CFU/g, ER was not modified but DT increased by ~ 1 day, only in one of the  
251 two experiments, partially reproducing the changes observed without dialysis (Fig. 7a-b; see also  
252 Fig. 1a-b, Table 1; 3 independent experiments for ER, 2 independent experiments for DT).

253 Cry1A profiles of dialyzed Delfin<sup>®</sup> A suspensions, like those of the non-dialyzed ones,  
254 comprised 130-kDa pro-toxins and 60-70 kDa activated toxins, but also showed toxin degradation  
255 as evidenced by additional smaller fragments of activated toxins (Fig. 7c). The respective roles of  
256 *Btk* toxin fragments and spores in the alterations of *D. melanogaster* development were further  
257 explored through experiments of dialysis such as those previously described followed by successive  
258 centrifugations to eliminate most of the spores and toxin crystals. Despite variation between  
259 experiments, ER was strongly affected only in one of the three experiments while DT was always  
260 significantly increased when flies were reared in presence of centrifuged supernatants that  
261 contained a limited range of Cry 1A toxin fragments (Supplementary information S6).

262

## 263 **Discussion**

264 The increasing use of bioinsecticides based on *Bacillus thuringiensis* (*Bt*) raised concern about  
265 potential side-effects on non-target biodiversity because of their partial specific targeting (de Souza

266 Machado et al. 2017; van Frankenhuyzen 2017; Venter and Bohn 2016), persistence in the  
267 environment (Duchet et al. 2014; Hung et al. 2016a, b), and requirement of repeated spraying to  
268 reach the desired pest control level (Brar et al. 2006). Especially, side-effects of chronic exposure  
269 on non-target biodiversity, including insects present on treated areas, remain under-evaluated. Here,  
270 we tested the side-effects of ingestion of *Bt* formulations (mainly *Bt kurstaki* (*Btk*) but also *Bt*  
271 *israelensis* (*Bti*)) throughout the entire development of several non-target species of *Drosophila*  
272 flies which are naturally present in treated areas. While formulation doses up to those recommended  
273 for field sprayings ( $\leq 10^6$  CFU/g of medium) had no effect on *Drosophila* development, mortality  
274 and/or developmental delay occurred from doses only 10 times and 50 times higher than the  
275 maximum recommended dose of the main tested *Btk* formulation for *D. suzukii* ( $10^7$  CFU/g) and the  
276 *D. melanogaster* strains ( $5 \times 10^7$  CFU/g), respectively. Besides, all the tested species except *D.*  
277 *simulans* were strongly affected at  $10^8$  CFU/g, and no (or extremely limited) fly development  
278 occurred at the highest tested dose ( $10^9$  CFU/g), equivalent to 1000 times the maximum  
279 recommended dose but below common acute intoxication doses (WHO Report, 2007).  
280 Recommended doses are those for each spraying on a homogeneous and dry zone without covering  
281 areas. In the field, both repeated spraying of stabilized formulation and rainfall washouts can  
282 increase *Bt* spores and toxins presence in both space and time. While the highest dose tested here  
283 would hardly be reached in the field, the minimal doses at which flies development was impacted  
284 may be readily obtained. Furthermore, the minimal quantity of *Bt* formulation inducing  
285 developmental alterations may be even lower since a single *Drosophila* larva is unlikely to process  
286 1g of medium given its size and feeding rate. Our data also evidence a window of susceptibility to  
287 *Btk* during the larval development, ingestion during the 1<sup>st</sup> larval instar being responsible for a large  
288 part of the observed detrimental effects on the development.

289         When testing for generic effects of *Bt* formulations, slightly different results were observed  
290 with two other *Btk* formulations and a formulation of *Bti*: there was no effect on *D. melanogaster*  
291 development at the doses up to  $10^8$  CFU/g but a strong detrimental effect at the highest dose tested,

292  $10^9$  CFU/g. All the *Btk* formulations, based on two different bacterial strains (see Methods), had  
293 similar profiles of Cry1A protoxins and activated toxins, but they differed in their efficient spore  
294 contents, formulation type, and likely additives, which may account for the observed variation in  
295 the half-lethal dose. The *Bti* formulation, widely used against Dipteran Nematoceran insects (e.g.  
296 mosquitoes, black flies; Becker 2000), impacted *D. melanogaster* development only at the highest  
297 dose tested. These impacts of *Bt* formulations on *D. melanogaster* development are consistent with  
298 growing evidence suggesting a partly specific targeting of *Bt* (van Frankenhuyzen 2013; Venter and  
299 Bøhn, 2016). Until recently, it has generally been accepted that the mode of action of *Bt* after  
300 ingestion by insects relies on key steps of specific binding of proteolyzed *Bt* toxins to receptors of  
301 midgut epithelial cells, defining targets for each *Bt* subspecies (Bravo et al. 2007, 2011; Palma et al.  
302 2014). Several primary and secondary types of toxin receptors, including cadherin-like proteins,  
303 aminopeptidases, GPI-anchored alkaline phosphatases (Adang et al. 2014), and more recently the  
304 ATP dependent binding cassette reporter C2 (Stevens et al. 2017), have been identified in  
305 Lepidoptera and Dipteran mosquitoes. Focusing on the action of *Btk* targeting Lepidoptera, no  
306 Lepidoptera cadherin-like Cry receptor orthologues were found in *Drosophila* (Stevens et al. 2017),  
307 supporting the idea that these flies would not be affected by the spraying of *Btk* formulation. The  
308 existence of other types of Cry receptors in *Drosophila* flies remains to be investigated. In addition,  
309 the substantial amounts of active Cry1A toxin fragments in *Btk* formulations could compensate for  
310 the possible lack of solubilization of protoxin crystals in the fly midgut and proteolytic activation of  
311 toxins by fly gut proteases, both required for Cry activity in insect larvae (Bravo et al. 2007). Other  
312 toxins synthesized by *Btk* and present in the formulations could also play a role in the observed  
313 cross-order activity as some, such as Cry2A, have an insecticidal effect on both Lepidoptera and  
314 Diptera (George and Crickmore 2012).

315         The lack of effect of ingestion of *Bacillus subtilis* or *Btk* Cry-free 4D22 on the development  
316 of *D. melanogaster* excludes that developmental alterations result from severe disruption of  
317 digestion and nutrient uptake/competition in the presence of high spore/bacteria loads in the larval

318 gut throughout development. It supports the idea of a synergistic action of *Btk* spores and Cry  
319 toxins, consistent with the models of *Bt* action on insect larvae in which toxins first breach the gut  
320 epithelium, allowing the gut content, including *Bt* spores, to colonize the hemocoel (Bravo et al.  
321 2007; Obata et al. 2009; Bravo et al. 2011; Caccia et al. 2016). The partially reproduced mortality  
322 rate and delayed development in dialysis experiments further indicate that low diffusible molecular  
323 weight compounds in *Btk* formulations (e.g., culture media residues, salts, additives) may contribute  
324 to these developmental alterations. This is supported by the lack of impact on *D. melanogaster*  
325 development of the ingestion of laboratory-produced spores and Cry toxins of a *Btk* 4D1 strain (or  
326 HD1, a reference strain used as a control strain, not used in the commercial formulations) used  
327 without additives, even at the highest dose  $10^9$  CFU/g (additional information S7; Fig. S7a, b). The  
328 *Btk* 4D1 culture contained few active Cry toxins and smaller toxin fragments, in contrast to  
329 commercial *Btk* formulations (Fig. S7c), supporting the possible contribution of these toxin  
330 fragments to the cross-order activity of *Btk* formulations on *Drosophila*.

331 As observed for *D. suzukii* exposed to laboratory-produced *Btk* cultures (Cossentine et al.  
332 2016), mortality of *D. melanogaster* during development on *Btk* formulation already occurred early  
333 in development. First and second instars larvae are probably highly exposed due to their high  
334 feeding rate and their exponential growth (Santos et al. 1997). As the observed larval mortality was  
335 only about 40% at the highest dose ( $10^9$  CFU/g) (Figure 2), while none of the individuals reached  
336 the pupal stage at this dose (Figure 4), the remaining mortality likely occurred during the third  
337 larval stage, maybe due to delayed action of *Btk* spores and toxins. Interestingly, alterations of the  
338 development (mortality and delayed emergence) mimicked those typically generated by nutritional  
339 stress conditions in insect larvae (Nepoux et al. 2010; Vantaux et al. 2016). Accordingly, the  
340 developmental alterations were partially rescued on a protein rich fly medium, probably through  
341 compensatory protein intake, as in other arthropod species (Moret and Schmid-Hempel 2000;  
342 Kutzer and Armitage 2016; Vantaux et al. 2016). In addition, the sex ratio of flies was strongly  
343 biased towards males after development on the dose of *Btk* formulation affecting fly emergence ( $10^8$

344 CFU/g) and under low protein conditions. This highlights the importance of nutritional conditions  
345 in *Btk* impacts on development, with sex-specific differences in larval susceptibility to  
346 environmental stressors, here the accumulation of *Btk* formulation, under protein restriction  
347 conditions as previously reported in *D. melanogaster* (Andersen et al. 2010).

348 The development on sublethal doses of *Btk* formulation did not dramatically affect the  
349 longevity of *D. melanogaster* adults and the offspring number throughout life. Developmental  
350 exposure to *Btk* doses that slightly and strongly reduced the likelihood of reaching the adult stage  
351 even gave males and females a dose-dependent longevity benefit, in addition to the male higher  
352 longevity observed in mixed-sex populations (Khazaeli and Curtsinger, 2000), and slightly  
353 increased the offspring number (although not significantly). Surviving the exposure to *Btk*  
354 formulation throughout the development has likely selected for fitter individuals. This is similar to  
355 the increased longevity of adult insects that have survived developmental nutritional stress (Rion  
356 and Kawecki, 2007, Burger et al. 2010), or are resistant to environmental stressors (Khazaeli and  
357 Curtsinger 2000).

358 The origin of *Drosophila* (species and population/strain) influenced the magnitude of the  
359 impacts of the *Btk* formulation on the development. Within the *D. melanogaster* species, all strains  
360 tested were susceptible to the *Btk* formulation with both mortality and delayed development at the  
361 same dose, but with variation in the effect magnitude. This suggests potential population-specific  
362 differences in susceptibility to *Btk* formulation accumulation in the environment, and hence  
363 potential spatial and temporal heterogeneity of *Btk* spraying impacts for each *Drosophila* species.  
364 At the fly community level, differences in susceptibility to *Btk* formulation, in terms of effect  
365 magnitude and type of developmental alteration (mortality and/or developmental delay) occurred  
366 between *Drosophila* species, regardless of their phylogenetic distances. In the *Drosophila*  
367 subgenus, *D. simulans* was less susceptible than its sister species *D. melanogaster*, whereas the  
368 African *D. yakuba* experienced similar impacts on the development as *D. melanogaster*. The three  
369 species *D. immigrans*, *D. subobscura* and *D. hydei* were similarly more susceptible than *D.*

370 *melanogaster*, but with slight differences in effect magnitudes. The phylogenetically distant *D.*  
371 *busckii* (*Dorsilopha* subgenus) was the least affected of all the species tested in terms of  
372 developmental mortality, but its development was strongly delayed. The five species *D.*  
373 *melanogaster*, *D. simulans*, *D. hydei*, *D. immigrans*, and *D. busckii* belong to the guild of  
374 cosmopolitan domestic *Drosophila* species, *D. subobscura* is sub-cosmopolitan species, and *D.*  
375 *busckii* is an opportunistic frugivorous species (Atkinson and Shorrocks 1977). All these species  
376 coexist frequently and compete on the same discrete and ephemeral rotting fruit patches, with  
377 seasonal variations in the composition of the fly community (Shorrocks 1991; Benado and Brncic  
378 1994; Nunney 1996; Mitsui and Kimura 2000). Differences in species susceptibility to  
379 accumulation of *Btk* formulation could modify larval competition conditions and lead to additional  
380 local and temporal variations in *Drosophila* communities' composition. The potential side-effects  
381 of *Bt* sprays on non-target *Drosophila* communities would be hardly predictable as they depend on  
382 spatial patterns of *Bt* accumulation.

383         The *Btk* formulation clearly impacted the development of the invasive *D. suzukii*, as recently  
384 reported by Cossentine et al. (2016), this species being the most susceptible here with effects  
385 already detectable at 10 times the recommended spraying dose. Compared with the other seven  
386 species that live on rotten fruits, *D. suzukii* poses a threat to fruit production because it feeds and  
387 lays eggs on healthy ripening fruits (Walsh et al. 2011; Delbac et al. 2014; Poyet et al. 2014) and  
388 hence colonizes orchards and vineyards earlier during the fruit season. The greater susceptibility of  
389 *D. suzukii* to the accumulation of *Btk* formulation in the environment might mitigate the potential  
390 ecological burden of its invasion for local communities of *Drosophila* frugivorous species in  
391 orchards. Alternatively, as *D. suzukii* attacks on fruits can accelerate their decomposition by  
392 microorganisms, its higher susceptibility to *Btk* could reduce the number of fruits made suitable for  
393 other *Drosophila* species.

394         In conclusion, we show here that repeated spraying and accumulation of *Btk* formulation  
395 can potentially impact non-target insect communities, and the magnitude of this impact could



396 depend on the formulation used and the insect species. Recent studies have reported similar adverse  
397 side-effects due to repeated spraying of the *Bti* formulation, directly on non-target organisms (e.g.  
398 Duguma et al. 2015), and indirectly on predators via food webs (e.g. Poulin et al. 2010). These  
399 studies and the data presented here highlight that pest control with *Bt* bioinsecticides should be done  
400 with caution in the field to avoid, or at least limit, potential negative impacts on non-target  
401 biodiversity and species communities within ecosystems. At last, *D. melanogaster*, a model species  
402 in many research fields, could also serve as a study model to assess the toxicity of *Bt* on non-target  
403 species, and identify the mechanisms underlying these side-effects.

404

## 405 **Methods**

### 406 *Commercial formulations, Bacillus productions and Colony Forming Unit measurement*

407 The tested commercial brands of *Bacillus thuringiensis kurstaki* (*Btk*; serotype 3a, b, c; Zeigler,  
408 1999) were Delfin<sup>®</sup> A and B (strain SA11; wettable granules, Valent BioSciences, AMM 9200482,  
409 32,000 UI/mg) and Scutello DF (a Dipel<sup>®</sup> sub-brand; strain ABTS-351; wettable granules, Biobest<sup>®</sup>,  
410 AMM 2010513, 540g/kg). The commercial brand of *Bacillus thuringiensis israelensis* (*Bti*; strain  
411 HD-14; serotype 14; Ziegler, 1999) was VectoBac<sup>®</sup> WG (wetable granules, Bayer, AMM 2020029,  
412 3000 UTI/mg). For each formulation, the number of viable spores (expressed as Colony Forming  
413 Units (CFU) per mg of granules) was estimated using serial dilutions of a suspension on LB agar  
414 plates and counting of bacterial colonies after overnight incubation at 30°C. CFU estimations were  
415  $5 \times 10^7$  CFU/mg for *Btk* Delfin<sup>®</sup> A;  $2.5 \times 10^7$  CFU/mg for *Btk* Delfin<sup>®</sup> B;  $2.2 \times 10^7$  CFU/mg for *Btk*  
416 Scutello DF;  $6 \times 10^7$  CFU/mg for *Bti* VectoBac<sup>®</sup>. No change in CFU estimations occurred during the  
417 time frame of the experiments. Manufacturer-recommended doses for Delfin<sup>®</sup> range from 0.15 to  
418 1.5 kg/ha depending on the crop type. Based on our CFU estimations, this corresponds to  
419 recommended doses of  $7.5 \times 10^4$  to  $7.5 \times 10^5$  CFU/cm<sup>2</sup> of Delfin<sup>®</sup> A, and  $3.75 \times 10^4$  to  $3.75 \times 10^5$   
420 CFU/cm<sup>2</sup> of Delfin<sup>®</sup> B for each spraying in the field. For Scutello DF, recommended doses range  
421 from 0.1 to 1 kg/ha, equivalent to  $2.2 \times 10^4$  to  $2.2 \times 10^5$  CFU/cm<sup>2</sup>. Vectobac<sup>®</sup> WG is used at 0.125 to

422 1 kg/ha, equivalent to  $7.5 \times 10^4$  to  $6 \times 10^5$  CFU/cm<sup>2</sup>.

423 The acrystillipherous (Cry toxin-free) *Btk* 4D22 strain (depleted for the toxin-encoding  
424 plasmids; Gonzalez et al. 1982) obtained from the Bacillus Genetic Stock Center (<http://bgsc.org>;  
425 Columbus USA), and a *Drosophila* non-pathogenic *Bacillus subtilis* (gift from Dr. E. Bremer,  
426 University of Marburg, Germany; A. Brun-Barale, pers. comm.) were grown at 30°C in the  
427 sporulation-specific medium PGSM (Bactopeptone<sup>®</sup> 7.5 g, KH<sub>2</sub>PO<sub>4</sub> 3.4 g, K<sub>2</sub>HPO<sub>4</sub> 4.35 g, glucose  
428 7.5 g, PGSM salts 5 mL, CaCl<sub>2</sub> 0.25 M, distilled water qsp 1L, pH 7.2; PGSM salts: MgSO<sub>4</sub>·7H<sub>2</sub>O,  
429 MnSO<sub>4</sub>·H<sub>2</sub>O, ZnSO<sub>4</sub>·7H<sub>2</sub>O, FeSO<sub>4</sub>·7H<sub>2</sub>O) for about 14 days for sporulation to occur. Following  
430 elimination of vegetative cells (1h at 70 °C), spore pellets were collected after centrifugation (4,500  
431 rpm, 20 min, 4 °C), washed with sterile water, and lyophilized. CFU numbers were counted for  
432 each preparation as described above.

433

#### 434 *Fly stocks*

435 The four tested strains of *Drosophila melanogaster* (phylogenetic subgroup: melanogaster) were the  
436 standard wild-type Canton S (Bloomington Drosophila Centre) used as a reference strain, the wild-  
437 type Nasrallah strain from Tunisia (strain 1333, Gif-sur-Yvette), the double mutant standard strain  
438 YW1118 (white and yellow mutations; gift from Dr. B. Charroux, IBD, Marseille-Luminy), and a  
439 recently field-collected strain (caught in Southern France in 2013) that we named “Sefra”. For  
440 *Drosophila* species comparison, we included 6 species of the *Drosophila* subgenus, *D. simulans*  
441 (strain 1132; phylogenetic subgroup: melanogaster), *D. yakuba* (strain 1880; phylogenetic subgroup:  
442 melanogaster), *D. hydei* (phylogenetic subgroup: hydei) and *D. suzukii* (phylogenetic subgroup:  
443 immigrans) (both kindly provided by Dr. R. Allemand, LBBE, University Lyon 1), *D. immigrans*  
444 (phylogenetic subgroup: immigrans), *D. subobscura* (phylogenetic subgroup: obscura), and one  
445 species of the *Dorsilopha* subgenus, *D. busckii* (all three species collected in South-East of France  
446 in Spring 2015).

447 All strains and species were maintained at controlled densities (150-200 eggs/40 ml of fly

448 medium) under standard laboratory conditions (25°C or 20°C for recently collected species, 60 %  
449 relative humidity, 12:12 light/dark cycle), on a high-protein/sugar-free fly medium (10 % cornmeal,  
450 10 % yeast, 0 % sugar). The *D. melanogaster* Canton S strain was also reared on a standard low-  
451 protein/sugar-free fly medium (8 % cornmeal, 2 % yeast, 2.5 % sugar) to test for the influence of  
452 the medium composition on *Btk* exposure effects.

453

#### 454 *Intoxication method and dose-response assay*

455 Commercial formulations and laboratory spore productions were suspended and diluted in buffer to  
456 perform dose-response assays with doses from  $10^5$  to  $10^9$  CFU/g of fly medium. All doses were  
457 prepared in 100  $\mu$ l and homogenized thoroughly with the fly medium (100 $\mu$ l/g). *Drosophila* eggs  
458 and larvae were collected from stock vials at the suitable developmental stage and transferred  
459 carefully to the intoxication vials and dishes, then maintained under standard laboratory conditions  
460 until a) the emergence of adults, or, in the larvae survival tests, b) until a given developmental stage  
461 was reached from the egg, and c) for 24h. Control groups of individuals were transferred on fly  
462 medium homogenized with the same volume of buffer.

463

#### 464 *Development-related traits and larval survival*

465 To evaluate emergence rates and developmental times upon intoxication throughout the entire  
466 development, precise numbers of eggs from mass oviposition were transferred to intoxication vials  
467 containing fly medium mixed with doses of *Bt* formulations or bacteria productions and let to  
468 develop under standard laboratory conditions until the fly emergence. Eggs without chorion and  
469 transparent eggs were discarded. The initial number of eggs was adjusted depending on the species  
470 biology and the vial size: 20 eggs for 2 g of fly medium in small vials ( $\varnothing$  3.3 cm, surface  $\sim$ 8.5 cm<sup>2</sup>,  
471 0.24 g/cm<sup>2</sup>) for tests with *D. melanogaster* Canton S, 50 eggs for 6 g of fly medium for comparison  
472 of *D. melanogaster* strains and *Drosophila* species in wider vials ( $\varnothing$  4.6 cm, surface  $\sim$ 16 cm<sup>2</sup>, 0.37  
473 g/cm<sup>2</sup>) except for *D. hydei*, *D. suzukii* and *D. immigrans* for which 30 eggs were transferred on 6 g

474 of fly medium. Numbers and sex of emerging flies were recorded once a day until the day the pupae  
475 of the next generation should form. From these data, the emergence rate (proportion of emerged  
476 flies from the initial eggs; ER), the mean developmental time (mean number of days for completion  
477 of development; DT), and the sex-ratio (proportion of male flies; SR) were calculated for each  
478 intoxication vial.

479 For the larval survival tests, 20 eggs or larvae from a 4-hour mass oviposition at the indicated  
480 developmental stage, were transferred to small dishes containing 1 g of fly medium ( $\emptyset$  3 cm,  
481 surface  $\sim 7$  cm<sup>2</sup>) homogenized with increasing doses of Delfin<sup>®</sup> A. Surviving larvae were counted at  
482 the indicated developmental stage, or after 24-hour intoxication, to calculate the proportion of  
483 surviving larvae. For the test from the egg, eggs which did not hatch were not included in the  
484 counting. As a control measurement, we measured the pH of the fly medium in the presence of the  
485 dose range of *Bt* formulations (see Supplementary Information S4).

486

#### 487 *Adult fitness-related traits*

488 For the longevity and offspring number tests, males and females emerged from several rearing vials  
489 for each dose of Delfin<sup>®</sup> A were pooled when aged 2 days. Groups of 15 males and 15 females were  
490 transferred into vials with fresh fly medium without formulation. Fly medium was renewed every 3-  
491 4 days. After each fly transfer to fresh food, discarded maintenance vials were incubated under  
492 standard laboratory conditions for the offspring to develop. Mortality and sex of dead flies were  
493 recorded daily until the last fly died. Offspring numbers were counted from the first emergence  
494 until pupae of the next generation appeared. The tests were repeated twice. Due to the variation in  
495 the duration of the two longevity experiments, offspring numbers of each vial were summed to  
496 obtain a total offspring number per dose of Delfin<sup>®</sup> A for each experiment.

497

#### 498 *Dialysis and Cry toxin analysis*

499 A suspension of  $2 \times 10^{10}$  CFU of Delfin<sup>®</sup> A was dialyzed against PBS (KH<sub>2</sub>PO<sub>4</sub> 1.06 mM,

500  $\text{Na}_2\text{HPO}_4(2\text{H}_2\text{O})$  3mM, NaCl 154 mM, qsp distilled water, pH 7.2), at 250 rpm, 4°C overnight,  
501 using an 8-10 kDa MW cut-off membrane (ZelluTrans, Roth®). The CFUs of the dialyzed  
502 suspension and the effects on ER and DT were analysed as described above. The dialyzed  
503 suspension was also subject to a 12.5 % SDS-PAGE and compared to the non-dialyzed suspension  
504 after silver staining. The presence of Cry1A pro-toxins, activated toxins and toxin fragments was  
505 probed by Western-blot using an in-house anti-Cry1A rabbit polyclonal antibody.

506

### 507 *Data analysis*

508 Data on development traits (emergence rate ER and developmental time DT), sex-ratio (SR),  
509 survival of larval stages and offspring number were analysed with mixed effect models including  
510 the dose of *Btk* formulation/spore production, the *D. melanogaster* strain, the *Drosophila* species or  
511 the developmental stage as fixed effects, and replicate (plus the experiment when necessary) as  
512 random effects (for ER data, data were analysed with bias-corrected models with replicate as fixed  
513 effect to allow pairwise comparisons; similar results obtained with models including replicate as  
514 random effect). ER, SR and survival of larval stages were analysed with generalized linear models,  
515 with binomial distribution and logit link. DT and offspring number were analysed with linear  
516 models. DT were transformed into developmental rates (1/developmental time) to fulfil the  
517 assumptions of the analysis of variance (homoscedasticity and residuals normality). Adult longevity  
518 data were analysed with proportional hazard Cox regression models including fly sex and dose of  
519 *Btk* formulation as fixed effects, and replicates as a random effect. For all the data sets, the main  
520 fixed effects and their interactions were tested with log-likelihood ratio tests. *Post hoc* pairwise  
521 comparisons were made for pairs of *D. melanogaster* strains, formulation/spore treatments, and  
522 between the control dose and the other doses. All the analyses were performed in R (R  
523 Development Core Team, 2008) using the packages lme4 (Bates et al. 2015), brglm (Kosmidis  
524 2017), multcomp (Horton et al. 2008), survival (Terry et al. 2000) and coxme (Terry and Therneau,  
525 2015).

526

527 **References**

- 528 Adang, M.J., Crickmore, N., Jurat-Fuentes, J.L. 2014. Diversity of *Bacillus thuringiensis* crystal  
529 toxins and mechanism of action. In: Dhadialla, T.S. and Gill, S.S., *Advances in Insect Physiology*  
530 vol. 47, Insect midgut and insecticidal proteins. Oxford Academic Press, pp. 39–87.
- 531 Andersen, L.H., Kristensen, T.N., Loeschcke, V., Toft, S., Mayntz, D. 2010. Protein and  
532 carbohydrate composition of larval food affects tolerance to thermal stress and desiccation in  
533 adult *Drosophila melanogaster*. *Journal of Insect Physiology*, 56: 336-340.
- 534 Atkinson, W., Shorrocks, B. 1977. Breeding site specificity in the domestic species of *Drosophila*.  
535 *Oecologia*, 29(3): 223-232.
- 536 Bächli, G. 1999-2008. TaxoDros: the database on the taxonomy of Drosophilidae. Available at:  
537 <http://www.taxodros.uzh.ch>.
- 538 Baldi, I., Cordier, S., Coumoul, X., Elbaz, A. 2013. Pesticides, effets sur la santé. Expertise  
539 collective. INSERM. Available at: <http://ipubli-inserm.inist.fr/handle/10608/1>.
- 540 Bates, D., Maechler, M., Bolker, B., Walker, S. 2015. Fitting linear mixed-effects models using  
541 lme4. *Journal of Statistical Software*, 67(1): 1-48.
- 542 Becker, N. 2000. Bacterial control of vector-mosquitoes and black flies. In: Charles, J.-F.,  
543 Delécluse, A., Nielsen-Roux, C. (ed.). *Entomopathogenic bacteria: from laboratory to field*  
544 application. Kluwer Academic Publishers. p. 383-398.
- 545 Ben-Dov, E., Zaritsky, A., Dahan, E., Barak, Z., Sinai, R., Manasherob, R., Khamraev, A.,  
546 Troitskaya, E., Dubitsky, A., Berezina, N., Margalith, Y. 1997. Extended screening by PCR for  
547 seven cry-group genes from field-collected strains of *Bacillus thuringiensis*. *Applied and*  
548 *Environmental Microbiology*, 63(12): 4883–4890.
- 549 Ben-Dov, E., Nissan, G., Pelleg, N., Manasherob, R., Boussiba, S., Zaritsky, A. 1999. Refined,  
550 circular restriction map of the *Bacillus thuringiensis* subsp. *israelensis* plasmid carrying the  
551 mosquito larvicidal genes. *Plasmid*, 42(3): 186-191.

- 552 Benado, M., Brncic, D. 1994. An eight-year phenological study of a local drosophilid community in  
553 Central Chile. *Journal of Zoological Systematics and Evolutionary Research*, 32: 51-63.
- 554 Benz, G., Perron, J.M. 1967. The toxic action of *Bacillus thuringiensis* “exotoxin” on *Drosophila*  
555 reared in yeast-containing and yeast-free media. *Experientia*, 23(10): 871–872.
- 556 Berry, C., O’Neil, S., Ben-Dov, E., Jones, A.F., Murphy, L., Quail, M.A., Holden, M.T.G., Harris,  
557 D., Zaritsky, A., Parkhill, J. 2002. Complete sequence and organization of pBtoxis, the toxin-  
558 coding plasmid of *Bacillus thuringiensis* subsp. *israelensis*. *Applied and Environmental*  
559 *Microbiology*, 68(10): 5082-5095.
- 560 Biganski, S., Jehle, J.A., Kleepies, R.G. 2017. *Bacillus thuringiensis* serovar *israelensis* has no  
561 effect on *Drosophila suzukii* Matsumura. *Journal of Applied Entomology*, 142: 33-36.
- 562 Bizzarri, M.F., Bishop, A.H. 2008. The ecology of *Bacillus thuringiensis* on the phylloplane:  
563 colonization from soil, plasmid transfer, and interaction with larvae of *Pieris brassicae*.  
564 *Microbial Ecology*, 56(1): 133-139.
- 565 Bradberry, S.M., Proudfoot, A.T., Vale, J.A. 2004. Glyphosate poisoning. *Toxicological Reviews*,  
566 23(3): 159-167.
- 567 Bravo, A., Gill, S.S., Soberon, M. 2007. Mode of action of *Bacillus thuringiensis* Cry and Cyt  
568 toxins and their potential for insect control. *Toxicon*, 49: 423-435.
- 569 Bravo, A., Likitvivatanavong, S., Gill, S.S., Soberon, M. 2011. *Bacillus thuringiensis*: a story of a  
570 successful bioinsecticide. *Insect Biochemistry and Molecular Biology*, 41(7): 423–431.
- 571 Bravo, A., Pacheco, S., Gomez, I., Garcia-Gomez B., Onofre, J., Soberon, M. 2017. Insecticidal  
572 proteins from *Bacillus thuringiensis* and their mechanism of action. In: Fiuza, L.M., Polanczyk,  
573 R.A., Crickmore, N. (eds). *Bacillus thuringiensis* and *Lysinibacillus sphaericus*, characterization  
574 and use in the field of biocontrol. pp. 53-66.
- 575 Burger, J.M.S., Buechel, S.D., Kawecki, T.J. 2010. Dietary restriction affects lifespan but not  
576 cognitive aging in *Drosophila melanogaster*. *Aging Cell*, 9: 327-335.
- 577 Caccia, S., Di Lelio, I., La Storia, A., Marinelli, A., Varricchio, P., Franzetti, E., Banyuls, N.,

- 578 Tettamanti, G., Casartelli, M., Giordana, B., Ferre, J., Gigliotti, S., Ercolini, D., Pennacchio, F.  
579 2016. Midgut microbiota and host immunocompetence underlie *Bacillus thuringiensis* killing  
580 mechanism. *Proceedings of the National Academy of Sciences of the United States of America*,  
581 113(34): 9486-9491.
- 582 Cossentine, J., Robertson, M., Xu, D. 2016. Biological activity of *Bacillus thuringiensis* in  
583 *Drosophila suzukii* (Diptera: Drosophilidae). *Journal of Economic Entomology*, 0(0): 1-8.
- 584 Couch, T.L., 2000. Industrial fermentation and formulation of entomopathogenic bacteria. In:  
585 Charles, J.-F., Delecluse, A., Nielsen-LeRoux, C. (Eds.), *Entomopathogenic Bacteria: From*  
586 *Laboratory to Field Application*. Kluwer Academic Publishers, Dordrecht, The Netherlands, pp.  
587 297–316.
- 588 Crickmore, N. 2017. *Bacillus thuringiensis* toxin classification. In: Fiuza, L., Polanczyk, R.,  
589 Crickmore, N. (eds) *Bacillus thuringiensis and Lysinibacillus sphaericus*. Springer.
- 590 de Souza Machado, A.A., Zarfl, C., Rehse, S., Kloas, W. 2017. Low-dose effects: nonmonotonic  
591 responses for the toxicity of a *Bacillus thuringiensis* biocide to *Daphnia magna*. *Environmental*  
592 *Science & Technology*, 51: 1679-1686.
- 593 Delbac, L., Rusch, A., Rouzes, R., Ravidat, M.-L., Launes, S., Thiéry, D. 2014. *Drosophila suzukii*  
594 est-elle une menace pour la vigne? *Phytoma*, 679 : 16-21.
- 595 Devine, G.J., Furlong, M.J. 2007. Insecticide use: contexts and ecological consequences.  
596 *Agriculture and Human Values*, 24(3): 281–306.
- 597 Duchet, C., Tetreau, G., Marie, A., Rey, D., Besnard, G., Perrin, Y., Paris, M., David, J.-P.,  
598 Lagneau, C., Desprès, L. 2014. Persistence and recycling of bioinsecticidal *Bacillus*  
599 *thuringiensis* subsp. *israelensis* spores in contrasting environments: evidence from field  
600 monitoring and laboratory experiments. *Microbial Ecology*, 67(3): 576–586.
- 601 Duguma, D., Hall, M.W., Rugman-Jones, P., Stouthamer, R., Neufeld, J.D., Walton, W.E. 2015.  
602 Microbial communities and nutrient dynamics in experimental microcosms are altered after the  
603 application of a high dose of *Bti*. *Journal of Applied Ecology*, 52: 763-773.



- 604 Enger, K.S., Mitchell, J., Murali, B., Bridsell, D.N., Keim, P., Gurian, P.L., Wagner, D.M. 2018.  
605 Evaluating the long-term persistence of *Bacillus* spores on common surfaces. *Microbial*  
606 *Biotechnology*, 56: 3073, 12.
- 607 George, Z., Crickmore, N. 2012. *Bacillus thuringiensis* applications in agriculture. In: E.  
608 Sansinenea (ed.). *Bacillus thuringiensis* biotechnology. p. 392.
- 609 Gilden, R.C., Huffling, K., Sattler, B. 2010. Pesticides and health risks. *Journal of Obstetric,*  
610 *Gynecologic & Neonatal Nursing*, 39(1): 103–110.
- 611 Glare, T.R., O’Callaghan, M. 2000. *Bacillus thuringiensis*: Biology, ecology and safety. John Wiley  
612 & Sons, UK. pp. 350.
- 613 Gonzales, J.M.Jr, Brown, B.J., Carlton, B.C. 1982. Transfer of *Bacillus thuringiensis* plasmids  
614 coding for  $\delta$ -endotoxin among strains of *B. thuringiensis* and *B. cereus*. *Proceedings of the*  
615 *National Academy of Sciences of the United States of America*, 79: 6951-6955.
- 616 Haller, S., Romeis, J.X.R., Meissle, M., 2017. Effects of purified or plant-produced Cry proteins on  
617 *Drosophila melanogaster* (Diptera: Drosophilidae) larvae. *Scientific Reports*, 1-11.
- 618 Hendriksen, N.B., Hansen, B.M. 2002. Long-term survival and germination of *Bacillus*  
619 *thuringiensis* var. *kurstaki* in a field trial. *Canadian Journal of Microbiology*, 48(3): 256–261.
- 620 Horton, T., Bretz, F., Westfall, P. 2008. Simultaneous inference in general parametric models.  
621 *Biometrical Journal*, 50(3): 346-363.
- 622 Hung, T.P., Truong, L.V., Binh, N.D., Frutos, R., Quiquampoix, H., Staunton, S. 2016. Persistence  
623 of detectable insecticidal proteins from *Bacillus thuringiensis* (Cry) and toxicity after adsorption  
624 on contrasting soils. *Environmental Pollution*, 208: 318–325.
- 625 Hung, T.P., Truong, L.V., Binh, N.D., Frutos, R., Quiquampoix, H., Staunton, S. 2016. Fate of  
626 insecticidal *Bacillus thuringiensis* Cry protein in soil: differences between purified toxin and  
627 biopesticide formulation. *Pest Management Science*, 72: 2247–2253.
- 628 Khazaeli, A.A., Curtsinger, J.W. 2000. Genetic analysis of extended lifespan in *Drosophila*  
629 *melanogaster* III. On the relationship between artificially selected and wild stocks. *Genetica*, 109:

- 630 245-253.
- 631 Khyami-Horani, H. 2002. Toxicity of *Bacillus thuringiensis* and *B. sphaericus* to laboratory  
632 populations of *Drosophila melanogaster* (Diptera: Drosophilidae). *Journal Basic Microbiology*,  
633 42(2): 105-110.
- 634 Koch, M.S., Ward, J.M., Levine, S.L., Baum, J.A., Vicini, J.L., Hammond, B.G. 2015. The food  
635 and environmental safety of *Bt* crops. *Frontiers in Plant Science*, 6: 283.
- 636 Kosmidis I (2017). *brglm: Bias Reduction in Binary-Response Generalized Linear Models*. R  
637 package version 0.6.1, <http://www.ucl.ac.uk/~ucakiko/software.html>.
- 638 Kutzer, M.A., Armitage, S.A.O. 2016. The effect of diet and time after bacterial infection on  
639 fecundity, resistance, and tolerance in *Drosophila melanogaster*. *Ecology and Evolution*, 6(13):  
640 4229-4242.
- 641 Lacey, L.A., Grzywacz, D., Shapiro-Ilan, D.I., Frutos, R., Brownbridge, M., Goettel, M.S. 2015.  
642 Insect pathogens as biological control agents: Back to the future. *Journal of Invertebrate*  
643 *Pathology*, 132(C): 1–41.
- 644 Mitsui, H., Kimura, M.T. 2000. Coexistence of drosophilid flies: aggregation, patch size diversity  
645 and parasitism. *Ecological Research*, 15: 93-100.
- 646 Moret, Y., Schmid-Hempel, P. 2000. Survival for immunity: the price of immune system activation  
647 for bumblebee workers. *Science*, 290(5494): 1166-1168.
- 648 Nepoux, V., Haag, C.R., Kawecki, T.J. 2010. Effects of inbreeding on aversive learning in  
649 *Drosophila*. *Journal of Evolutionary Biology*, 23: 2333-2345.
- 650 Nunney, L. 1996. The colonization of oranges by the cosmopolitan *Drosophila*. *Oecologia*, 108:  
651 552-561.
- 652 Obata, F., Kitami, M., Inoue, Y., Atsumi, S., Yoshizawa, Y., Sato, R. 2009. Analysis of the region  
653 for receptor binding and triggering of oligomerization on *Bacillus thuringiensis* Cry1Aa toxin.  
654 *FEBS Journal*, 276: 5949-5959.
- 655 Obeidat, M. 2008. Toxicity of local *Bacillus thuringiensis* isolates against *Drosophila melanogaster*.

- 656 *World Journal of Agricultural Sciences*, 4(2): 161-167.
- 657 Obeidat, M., Khymani-Horani, H. and Al-Momani, F. 2012. Toxicity of *Bacillus thuringiensis*  $\beta$ -  
658 exotoxins and  $\delta$ -endotoxins to *Drosophila melanogaster*, *Ephesia kuhniella* and human  
659 erythrocytes. *African Journal of Biotechnology*, 11(46):10504-10512.
- 660 Palma, L., Muñoz, D., Berry, C., Murillo, J., Caballero, P. 2014. *Bacillus thuringiensis* toxins: an  
661 overview of their biocidal activity. *Toxins*, 6(12): 3296–3325.
- 662 Pimentel, D., Burgess, M. 2014. Environmental and economic costs of the application of pesticides  
663 primarily in the United States. In: *Integrated Pest Management*. Dordrecht: Springer Netherlands.  
664 pp. 47–71.
- 665 Poulin, B., Lefebvre, G., Paz, L. 2010. Red flag for green spray: adverse trophic effects of *Bti* on  
666 breeding birds. *Journal of Applied Ecology*, 47: 884-889.
- 667 Poyet, M., Eslin, P., Héraude, M., Le Roux, V., Prévost, G., Givert, P., Chabrierie, O. 2014. Invasive  
668 host for invasive pest: when the Asiatic cherry fly (*Drosophila suzukii*) meets the American  
669 black cherry (*Prunus serotina*) in Europe. *Agricultural and Forest Entomology*, 1-9, DOI:  
670 10.1111/afe012052.
- 671 R Development Core Team 2008. R: A language and environment for statistical computing. R  
672 Foundation for Statistical Computing, Vienna, Austria. ISBN 3-900051-07-0, URL  
673 <http://www.R-project.org>.
- 674 Rabinovitch, L., Vivoni, A.M., Machado, V., Knaak, N., Berlitz, D.L., Polanczyk, R.A., Fiuza, L.M.  
675 2017. *Bacillus thuringiensis* characterization: morphology, physiology, biochemistry, pathotype,  
676 cellular, and molecular aspects. In: Fiuza, L.M., Polanczyk, R.A., Crickmore, N. (eds). *Bacillus*  
677 *thuringiensis* and *Lysinibacillus sphaericus*, characterization and use in the field of biocontrol.  
678 pp. 1-18.
- 679 Raymond, B., Wyres, K.L., Sheppard, S.K., Ellis, R.J., Bonsall, M.B. 2010. Environmental factors  
680 determining the epidemiology and population genetic structure of the *Bacillus cereus* group in  
681 the field. *PloS Pathogens*, 6(5): e1000905.

- 682 Rion, S., Kawecki, T.J. 2007. Evolutionary biology of starvation resistance: what we have learned  
683 from *Drosophila*. *Journal of Evolutionary Biology*, 20(5): 1655-1664.
- 684 Rizzati, V., Briand, O., Guillou, H., Gamet-Payraastre, L. 2016. Effects of pesticide mixtures in  
685 human and animal models: an update of the recent literature. *Chemico-Biological Interactions*,  
686 254: 231–246.
- 687 Saadoun, I., Al-Moman, F., Obeidat, M., Meqdam, M., Elbetieha, A. 2001. Assessment of toxic  
688 potential of local Jordanian *Bacillus thuringiensis* strains on *Drosophila melanogaster* and *Culex*  
689 sp (Diptera). *Journal of Applied Microbiology*, 90: 866-872.
- 690 Sanchis, V., Bourguet, D. 2008. *Bacillus thuringiensis*: applications in agriculture and insect  
691 resistance management. A review. *Agronomy for Sustainable Development*, 28(1): 11–20.
- 692 Santos, M., Borash, D.J., Joshi, A., Bounlutay, N., Mueller, L.D. 1997. Density-dependent natural  
693 selection in *Drosophila*: evolution of growth rate and body size. *Evolution*, 51(2): 420-432.
- 694 Schnepf, E., Crickmore, N., Van Rie, J., Lereclus, D., Baum, J., Feitelson, J., Zeigler, D.R., Dean,  
695 D.H. 1998. *Bacillus thuringiensis* and its pesticidal crystal proteins. *Microbiology and Molecular*  
696 *Biology Reviews*, 62(3): 775–806.
- 697 Shorrocks, B. 1991. Competition on a divided and ephemeral resource: a cage experiment.  
698 *Biological Journal of the Linnean Society*, 43: 211-220.
- 699 Stevens, T., Song, S., Bruning, J.B., Choo, A., Baxter, S.W. 2017. Expressing a moth *abcc2* gene in  
700 transgenic *Drosophila* causes susceptibility to Bt Cry1Ac without requiring a cadherin-like  
701 protein receptor. *Insect Biochemistry and Molecular Biology*, 80: 61-70.
- 702 Tennessen, J.M., Thummel, C.S. 2011. Coordinating growth and maturation - Insights from  
703 *Drosophila*. *Current Biology*, 21(18): R750–757.
- 704 Therneau, T.M. 2015. *coxme: Mixed Effects Cox Models*. R package version 2.2-5.  
705 <https://CRAN.R-project.org/package=coxme>
- 706 Therneau, T.M., Grambsch, P.M. 2000. *Modeling survival data: extending the Cox model*. Springer,  
707 New York, ISBN 0-387-98784-3.

- 708 United Nations, Department of Economic and Social Affairs, Population Division 2015. World  
709 Population Prospects 2015 – Data Booklet (ST/ESA/SER.A/377).
- 710 van Frankenhuyzen K. 2013. Cross-order and cross-phylum activity of *Bacillus thuringiensis*  
711 pesticidal proteins. *Journal of Invertebrate Pathology*, 114(1): 76–85.
- 712 van Frankenhuyzen, K. 2017. Specificity and cross-order activity of *Bacillus thuringiensis*  
713 pesticidal proteins. In: Fiuza, L.M., Polanczyk, R.A., Crickmore, N. (eds). *Bacillus thuringiensis*  
714 and *Lysinibacillus sphaericus*, characterization and use in the field of biocontrol. pp. 127-172.
- 715 Vantaux, A., Ouattarra, I., Lefèvre, T., Dabiré, K.R. 2016. Effects of larvicidal and larval nutritional  
716 stresses on *Anopheles gambiae* development, survival and competence for *Plasmodium*  
717 *falciparum*. *Parasites & Vectors*, 9: 226.
- 718 Venter, H.J., Bøhn, T. 2016. Interactions between Bt crops and aquatic ecosystems: A review.  
719 *Environmental Toxicology and Chemistry*, 35(12): 2891–2902.
- 720 Walsh, D.B., Bolda, M.P., Goodhue, R.E., Dreves, A.J., Lee, J., Bruck, D.J., Walton, V.M., O’Neal,  
721 S.D., Zalom, F.G. 2011. *Drosophila suzukii* (Diptera: Drosophilidae): invasive pest of ripening  
722 soft fruit expanding its geographic range and damage potential. *Journal of Integrated Pest*  
723 *Management*, 2(1): DOI: 10.1603/IPM10010.
- 724 Wei, J., Liang, G., Wang, B., Zhong, F., Chen, L., Khaing, M.M., Zhang, J., Guo, Y., Wu, K.,  
725 Tabashnik, B.E. 2016. Activation of Bt protoxin Cry1Ac in resistant and susceptible cotton  
726 bollworm. *PLoS ONE*, 11(6): e0156560.
- 727 WHO report 1999. Guideline specification for bacterial larvicides for public health use. WHO  
728 document WHO/CDS/CPC/WHOPES/99.2. World Health Organization, Geneva.
- 729 WHO report 2007. WHO specifications and evaluations for public health pesticides: *Bacillus*  
730 *thuringiensis* subspecies *israelensis* strain AM65-52. World Health Organization, Geneva.
- 731 Zeigler, D.R. 1999. *Bacillus* genetic stock center catalog of strains, 7<sup>th</sup> edition. Part 2: *Bacillus*  
732 *thuringiensis* and *Bacillus cereus*. pp. 58.
- 733

734 **Acknowledgements**

735 We thank Xiao Han, Jingru Li and Abir Oueslati for help with preliminary experiments, L.  
736 Kremmer, C. Rebuf and O. Magliano for providing and rearing flies and help in preparing fly  
737 medium, A. Brun-Barale for the *Bacillus subtilis* spores, D. Pauron for preparation of Cry1A toxin,  
738 Hugo Mathé-Hubert for advice on statistical analyses, and M. Amichot for helpful discussions. The  
739 Cry1A antibody was produced in collaboration with the INRA-PFIE platform (Nouzilly, France).

740

741 **Financial Supports**

742 This work was supported by the French National Agency for Research (ANR-13-CESA-0003-001  
743 ImBio), the European Union's Seventh Framework Program for research, technological  
744 development and demonstration under grant agreement No. 613678 (DROPSA), the "Investments  
745 for the Future" LABEX SIGNALIFE (ANR-11-LABX-0028), and the INRA Plant Health  
746 Department.

747

748 **Author contributions**

749 AB, MP NE, AG, JLG and MP designed the experiments. AB performed the experiments with  
750 contributions of MPNE. AB performed the statistical analyses. AB, JLG, and MP wrote the  
751 manuscript with contributions from all the authors.

752

753 **Additional information**

754 **Supplementary information**

755 **Competing financial interest:** The authors declare no competing financial interests.

756

757

758 **Table 1.** Results of statistical analyses to assess the effect of the dose of formulation/spore  
759 production and its interaction with the treatment, the larval instar, the experiment, the sex, the fly  
760 strain and the fly species when appropriate. See figures for *post hoc* comparisons of the doses with  
761 the control dose.  
762

| Source of variation/Data                                                                                                                       | $\chi^2$ / Deviance | d.f. | P value         |
|------------------------------------------------------------------------------------------------------------------------------------------------|---------------------|------|-----------------|
| <b>Development on <i>Btk</i> Delfin<sup>®</sup> A, <i>Btk</i> 4D22, <i>Bti</i> Vectobac<sup>®</sup>, <i>Bacillus subtilis</i></b>              |                     |      |                 |
| <i>Emergence rate</i>                                                                                                                          |                     |      |                 |
| Dose × Treatment                                                                                                                               | 285.7               | 20   | < <b>0.0001</b> |
| Dose for each treatment:                                                                                                                       |                     |      |                 |
| - Delfin <sup>®</sup> A                                                                                                                        | 237.5               | 6    | < <b>0.0001</b> |
| - 4D22                                                                                                                                         | 7.0                 | 7    | 0.40            |
| - Vectobac <sup>®</sup>                                                                                                                        | 165.8               | 5    | < <b>0.0001</b> |
| - <i>B. subtilis</i>                                                                                                                           | 1.9                 | 6    | 0.93            |
| <i>Developmental time</i>                                                                                                                      |                     |      |                 |
| Dose × Treatment                                                                                                                               | 220.8               | 19   | < <b>0.0001</b> |
| Dose for each treatment:                                                                                                                       |                     |      |                 |
| - Delfin <sup>®</sup> A                                                                                                                        | 68.8                | 6    | < <b>0.0001</b> |
| - 4D22                                                                                                                                         | 16.08               | 7    | <b>0.024</b>    |
| - Vectobac <sup>®</sup>                                                                                                                        | 37.5                | 6    | < <b>0.0001</b> |
| - <i>B. subtilis</i>                                                                                                                           | 13.5                | 7    | 0.060           |
| <b>Development on <i>Btk</i> Delfin<sup>®</sup> B and Scutello DF (dose effect)</b>                                                            |                     |      |                 |
| <i>Emergence rate</i>                                                                                                                          |                     |      |                 |
| - Delfin <sup>®</sup> B                                                                                                                        | 151.2               | 2    | < <b>0.0001</b> |
| - Scutello DF                                                                                                                                  | 105.1               | 2    | < <b>0.0001</b> |
| <i>Developmental time</i>                                                                                                                      |                     |      |                 |
| - Delfin <sup>®</sup> B                                                                                                                        | 2.5                 | 1    | 0.12            |
| - Scutello DF                                                                                                                                  | 30.9                | 2    | < <b>0.0001</b> |
| <b>Role of formulation components in the development alterations (dialysis)</b>                                                                |                     |      |                 |
| Dose effect                                                                                                                                    |                     |      |                 |
| <i>Emergence rate</i>                                                                                                                          | 459.8               | 3    | < <b>0.0001</b> |
| <i>Developmental time</i>                                                                                                                      | 13.7                | 2    | <b>0.0011</b>   |
| <b>Survival of larval stages on Delfin<sup>®</sup> A</b>                                                                                       |                     |      |                 |
| <i>Cumulative survival</i>                                                                                                                     |                     |      |                 |
| Dose × Larval instar                                                                                                                           | 16.2                | 5    | <b>0.0063</b>   |
| Dose for each instar:                                                                                                                          |                     |      |                 |
| - late 1 <sup>st</sup> instar                                                                                                                  | 87.4                | 5    | < <b>0.0001</b> |
| - late 2 <sup>nd</sup> instar                                                                                                                  | 25.7                | 5    | <b>0.0001</b>   |
| <i>24-hour survival</i>                                                                                                                        |                     |      |                 |
| Dose × Larval instar                                                                                                                           | 15.9                | 5    | <b>0.007</b>    |
| Dose for each instar:                                                                                                                          |                     |      |                 |
| - late 1 <sup>st</sup> instar                                                                                                                  | 55.9                | 5    | < <b>0.0001</b> |
| - late 2 <sup>nd</sup> instar                                                                                                                  | 3.76                | 5    | 0.58            |
| <b>Adult fitness-related traits after development on Delfin<sup>®</sup> A</b>                                                                  |                     |      |                 |
| <i>Longevity</i>                                                                                                                               |                     |      |                 |
| Experiment                                                                                                                                     | 20.1                | 1    | < <b>0.0001</b> |
| <i>- 1<sup>st</sup> experiment:</i>                                                                                                            |                     |      |                 |
| Dose                                                                                                                                           | 12.3                | 3    | <b>0.0065</b>   |
| Sex                                                                                                                                            | 35.0                | 1    | < <b>0.0001</b> |
| (e <sup>β</sup> coefficient males vs females ± se: 0.55 ± 0.16)                                                                                |                     |      |                 |
| Dose × Sex                                                                                                                                     | 20.4                | 3    | <b>0.00014</b>  |
| <i>Sexes analyzed separately</i>                                                                                                               |                     |      |                 |
| - females                                                                                                                                      | 12.0                | 3    | <b>0.0073</b>   |
| (e <sup>β</sup> coefficients vs control ± se: 5×10 <sup>6</sup> : 1.05 ± 0.17, 5×10 <sup>7</sup> : 0.71 ± 0.16, 10 <sup>8</sup> : 0.60 ± 0.21) |                     |      |                 |
| - males                                                                                                                                        | 20.4                | 3    | <b>0.00014</b>  |
| (e <sup>β</sup> coefficients vs control ± se: 5×10 <sup>6</sup> : 0.80 ± 0.16, 5×10 <sup>7</sup> : 0.66 ± 0.16, 10 <sup>8</sup> : 1.53 ± 0.18) |                     |      |                 |

763  
764



| Source of variation/Data                                                                                                                             | $\chi^2$ / Deviance | d.f. | P value            |
|------------------------------------------------------------------------------------------------------------------------------------------------------|---------------------|------|--------------------|
| <b>Adult fitness-related traits after development on Delfin® A</b>                                                                                   |                     |      |                    |
| <u>- 2<sup>nd</sup> experiment:</u>                                                                                                                  |                     |      |                    |
| Dose                                                                                                                                                 | 16.5                | 3    | <b>0.00090</b>     |
| Sex                                                                                                                                                  | 31.5                | 1    | <b>&lt; 0.0001</b> |
| (e <sup>β</sup> coefficient males vs females ± se: 0.45 ± 0.22)                                                                                      |                     |      |                    |
| Dose × Sex                                                                                                                                           | 0.69                | 3    | 0.88               |
| <u>Sexes analyzed separately</u>                                                                                                                     |                     |      |                    |
| - females                                                                                                                                            | 13.2                | 3    | <b>0.0043</b>      |
| (e <sup>β</sup> coefficients doses vs control ± se: 5×10 <sup>6</sup> : 0.92 ± 0.22, 5×10 <sup>7</sup> : 0.63 ± 0.21, 10 <sup>8</sup> : 0.51 ± 0.21) |                     |      |                    |
| - males                                                                                                                                              | 7.01                | 3    | <b>0.072</b>       |
| (e <sup>β</sup> coefficients doses vs control ± se: 5×10 <sup>6</sup> : 1.02 ± 0.22, 5×10 <sup>7</sup> : 0.70 ± 0.22, 10 <sup>8</sup> : 0.64 ± 0.22) |                     |      |                    |
| <u>Total numbers of offspring</u>                                                                                                                    |                     |      |                    |
| Dose × Experiment                                                                                                                                    | 28.1                | 3    | <b>&lt; 0.0001</b> |
| <u>Dose for each experiment:</u>                                                                                                                     |                     |      |                    |
| - 1 <sup>st</sup> experiment                                                                                                                         | 26.3                | 3    | <b>&lt; 0.0001</b> |
| - 2 <sup>nd</sup> experiment                                                                                                                         | 4.1                 | 3    | 0.25               |
| <b>Development of other strains of <i>D. melanogaster</i> on Delfin® A (including Canton S)</b>                                                      |                     |      |                    |
| <u>Emergence rate</u>                                                                                                                                |                     |      |                    |
| Dose × Fly strain                                                                                                                                    | 105.5               | 15   | <b>&lt; 0.0001</b> |
| Dose for each fly strain:                                                                                                                            |                     |      |                    |
| - Canton S                                                                                                                                           | 588.6               | 5    | <b>&lt; 0.0001</b> |
| - Nasrallah                                                                                                                                          | 745.3               | 5    | <b>&lt; 0.0001</b> |
| - Sefra                                                                                                                                              | 900.7               | 5    | <b>&lt; 0.0001</b> |
| - YW1118                                                                                                                                             | 636.9               | 5    | <b>&lt; 0.0001</b> |
| <u>Developmental time</u>                                                                                                                            |                     |      |                    |
| Dose × Fly strain                                                                                                                                    | 9.3                 | 12   | 0.68               |
| Dose for each fly strain:                                                                                                                            |                     |      |                    |
| - Canton S                                                                                                                                           | 40.3                | 4    | <b>&lt; 0.0001</b> |
| - Nasrallah                                                                                                                                          | 18.0                | 4    | <b>0.0012</b>      |
| - Sefra                                                                                                                                              | 27.2                | 4    | <b>&lt; 0.0001</b> |
| - YW1118                                                                                                                                             | 28.9                | 4    | <b>&lt; 0.0001</b> |
| <b>Development of other <i>Drosophila</i> species on Delfin® A</b>                                                                                   |                     |      |                    |
| <u>Emergence rate</u>                                                                                                                                |                     |      |                    |
| Dose × Fly species                                                                                                                                   | 538.2               | 30   | <b>&lt; 0.0001</b> |
| Dose for each species:                                                                                                                               |                     |      |                    |
| - <i>D. simulans</i>                                                                                                                                 | 461.0               | 5    | <b>&lt; 0.0001</b> |
| - <i>D. yakuba</i>                                                                                                                                   | 750.7               | 5    | <b>&lt; 0.0001</b> |
| - <i>D. hydei</i>                                                                                                                                    | 596.8               | 5    | <b>&lt; 0.0001</b> |
| - <i>D. immigrans</i>                                                                                                                                | 726.3               | 5    | <b>&lt; 0.0001</b> |
| - <i>D. subobscura</i>                                                                                                                               | 729.6               | 5    | <b>&lt; 0.0001</b> |
| - <i>D. sukukii</i>                                                                                                                                  | 725.0               | 5    | <b>&lt; 0.0001</b> |
| - <i>D. busckii</i>                                                                                                                                  | 586.0               | 5    | <b>&lt; 0.0001</b> |
| <u>Developmental time</u>                                                                                                                            |                     |      |                    |
| Dose × Fly species                                                                                                                                   | 59.9                | 22   | <b>&lt; 0.0001</b> |
| Dose for each species:                                                                                                                               |                     |      |                    |
| - <i>D. simulans</i>                                                                                                                                 | 25.9                | 4    | <b>&lt; 0.0001</b> |
| - <i>D. yakuba</i>                                                                                                                                   | 34.7                | 4    | <b>&lt; 0.0001</b> |
| - <i>D. hydei</i>                                                                                                                                    | 11.5                | 4    | <b>0.022</b>       |
| - <i>D. immigrans</i>                                                                                                                                | 6.01                | 3    | 0.11               |
| - <i>D. subobscura</i>                                                                                                                               | 68.8                | 4    | <b>&lt; 0.0001</b> |
| - <i>D. sukukii</i>                                                                                                                                  | 11.7                | 3    | <b>0.0085</b>      |
| - <i>D. busckii</i>                                                                                                                                  | 58.8                | 4    | <b>&lt; 0.0001</b> |

766 **Figure legends**

767 **Figure 1. Development of *D. melanogaster* Canton S flies on *Btk* and *Bti* commercial**  
768 **formulations. (a)** Emergence rate (mean  $\pm$  sem) and **(b)** developmental time (mean  $\pm$  sem) of 20  
769 initial eggs on increasing doses of *Btk* Delfin<sup>®</sup> A (red triangles), the Cry-free *Btk* 4D22 (open  
770 lozenges), the mosquito-targeting *Bti* Vectobac<sup>®</sup> (green squares), and the non-pathogenic *Bacillus*  
771 *subtilis* (light grey circles). For Vectobac<sup>®</sup> and *B. subtilis*,  $N = 4-7$  per dose; for Delfin<sup>®</sup> A and *Btk*  
772 4D22,  $N = 9-12$  for the control,  $N = 3$  for  $5 \cdot 10^5$  and  $10^9$ ,  $N = 4-9$  for  $10^6$ ,  $N = 7-14$  from  $5 \cdot 10^6$  to  $10^8$ .  
773 **(c)** Emergence rate (mean  $\pm$  sem) and **(d)** developmental time (mean  $\pm$  sem) on increasing doses of  
774 the two *Btk* formulations Delfin<sup>®</sup> B (dark red circles) and Scutello DF (orange squares).  $N = 4$   
775 replicates of 20 eggs per dose and formulation, except for controls and  $10^8$  CFU/g of Delfin<sup>®</sup> B (9-  
776 10 replicates of 20 eggs). Results of *post hoc* comparisons of each dose to the control:  $\cdot 0.05 < p < 0.1$ ;  
777  $* 0.01 < p < 0.05$ ;  $** 0.001 < p < 0.01$ ;  $*** p < 0.001$ . **(e)** Immunoblotting with an anti-Cry1A polyclonal  
778 antibody on proteins from a suspension of laboratory-produced spores of Cry-free *Btk* 4D22, the  
779 three *Btk* formulations Delfin<sup>®</sup> A, B, Scutello DF, and a suspension of laboratory-produced Cry1A  
780 toxins. Red asterisks indicate the Cry protoxins ( $\sim 130$  kDa) and the activated fragments ( $\sim 60$  kDa  
781 and  $\sim 70$  kDa).

782

783 **Figure 2. Survival of *D. melanogaster* Canton S larval stages on increasing doses of *Btk***  
784 **Delfin<sup>®</sup> A. (a)** Proportion of surviving larvae (mean  $\pm$  sem) upon *Btk* exposure from the egg to late  
785 1<sup>st</sup> instar (open lozenges) and late 2<sup>nd</sup> instar (black triangles). **(b)** Proportion of surviving larvae  
786 (mean  $\pm$  sem) upon 24-hour *Btk* exposure of early 1<sup>st</sup> instar larvae (open lozenges) and 2<sup>nd</sup> instar  
787 larvae (black triangles).  $N = 5-7$  replicates of 20 individuals per dose. Results of *post hoc*  
788 comparisons of each dose with the control:  $* 0.01 < p < 0.05$ ;  $** 0.001 < p < 0.01$ ;  $*** p < 0.001$ .

789

790 **Figure 3. Fitness-related traits of adults (longevity and total offspring number) after**  
791 **development on *Btk* Delfin<sup>®</sup> A. (a, d)** Female longevity (mean survival fraction over time  $\pm$  sem),

792 (b, e) Male longevity (mean  $\pm$  sem), and (c, f) total offspring number (mean  $\pm$  sem), measured on  
793 individuals that developed without *Btk* (blue items) and on  $5 \times 10^6$  CFU/g of *Btk* Delfin<sup>®</sup> A (green  
794 items),  $5 \times 10^7$  CFU/g (red items), and  $10^8$  CFU/g (dark red items). Data from 2 experiments (a-c,  
795 experiment 1; d-f, experiment 2). For each trait,  $N = 3$ -5 replicates of 15 males and 15 females per  
796 dose in experiment 1,  $N = 3$  replicates of 15 males and 15 females in experiment 2. Results of *post*  
797 *hoc* comparisons of each dose with the control: \*  $0.01 < p < 0.05$ ; \*\*  $0.001 < p < 0.01$ ; \*\*\*  $p < 0.001$ .

798

799 **Figure 4. Development of four *D. melanogaster* strains on increasing doses of *Btk* Delfin<sup>®</sup> A.** (a)  
800 Emergence rate (mean  $\pm$  sem), (b) Developmental time (mean  $\pm$  sem) of the strains Canton S (blue  
801 lozenges), Nasrallah (yellow triangles), Sefra (green squares), and YW1118 (red circles).  $N = 4$   
802 groups of 50 eggs per dose and fly strain for each trait. Results of *post hoc* comparisons of each  
803 dose to the control:  $\cdot 0.05 < p < 0.1$ ; \*  $0.01 < p < 0.05$ ; \*\*  $0.001 < p < 0.01$ ; \*\*\*  $p < 0.001$ .

804

805 **Figure 5. Emergence rate of seven *Drosophila* species on increasing doses of *Btk* Delfin<sup>®</sup> A.**  
806 Mean emergence rate ( $\pm$  sem).  $N = 4$  replicates of 50 eggs per dose for *D. simulans*, *D. yakuba*, *D.*  
807 *subobscura*, and *D. busckii*,  $N = 4$  replicates of 30 eggs per dose for *D. hydei*, *D. suzukii*, and *D.*  
808 *immigrans*. Results of *post hoc* comparisons of each dose with the control:  $\cdot 0.05 < p < 0.1$ ; \*  
809  $0.01 < p < 0.05$ ; \*\*  $0.001 < p < 0.01$ ; \*\*\*  $p < 0.001$ .

810

811 **Figure 6. Developmental time of seven *Drosophila* species on increasing doses of *Btk* Delfin<sup>®</sup> A.**  
812 Mean developmental time ( $\pm$  sem).  $N = 4$  replicates of 50 eggs per dose for *D. simulans*, *D. yakuba*,  
813 *D. subobscura*, and *D. busckii*,  $N = 4$  replicates of 30 eggs per dose for *D. hydei*, *D. suzukii*, and *D.*  
814 *immigrans*. Results of *post hoc* comparisons of each dose with the control: \*  $0.01 < p < 0.05$ ; \*\*  
815  $0.001 < p < 0.01$ ; \*\*\*  $p < 0.001$ .

816

817

818 **Figure 7. Evaluation of the role of small molecular weight components of *Btk* Delfin<sup>®</sup> A**  
819 **(dialysis; membrane cut-off: 8-10 kDa) in the altered development of *D. melanogaster* Canton**  
820 **S. (a) Emergence rate (mean  $\pm$  sem) and (b) developmental time (mean  $\pm$  sem) on increasing doses**  
821 **of dialyzed Delfin<sup>®</sup> A.  $N = 3$  experiments of 4 replicates with 20 eggs per dose for the emergence**  
822 **rate,  $N = 2$  experiments of 4 replicates per dose for the developmental time. Results of *post hoc***  
823 **comparisons of each dose with the control:  $\cdot 0.05 < p < 0.1$ ;  $* 0.01 < p < 0.05$ ;  $** 0.001 < p < 0.01$ ;  $***$**   
824  **$p < 0.001$ . (c) Anti-Cry1A probed immunoblot of non-dialyzed (ND) and dialyzed (D) suspensions**  
825 **showing the decrease in the amount of  $\sim 130$  kDa protoxins and the increase in that of  $\sim 60/70$  kDa**  
826 **activated toxins after dialysis.**

**Figure 1**

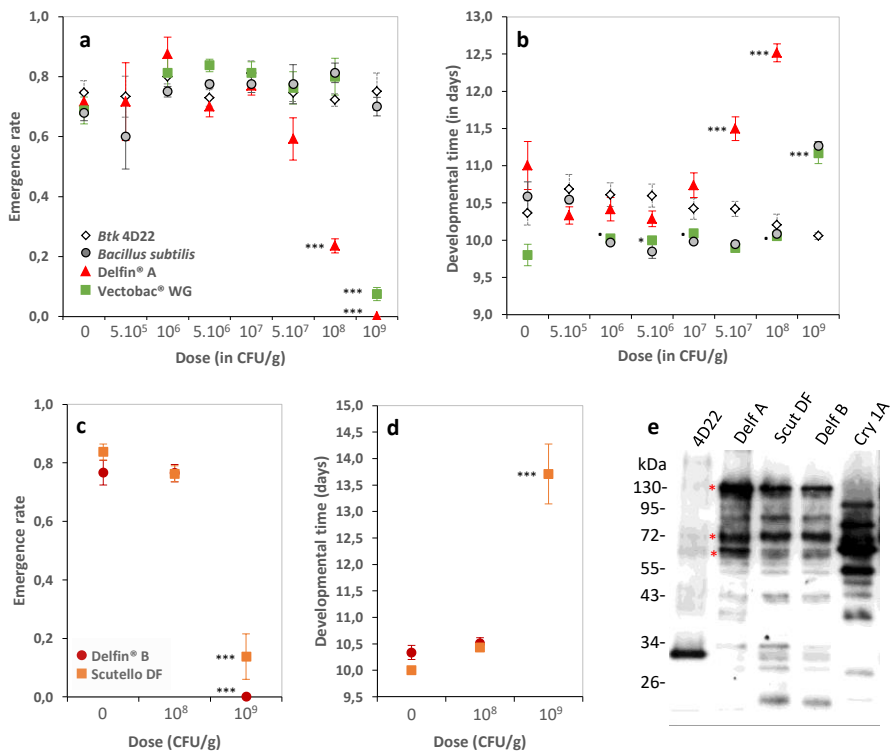

Figure 2

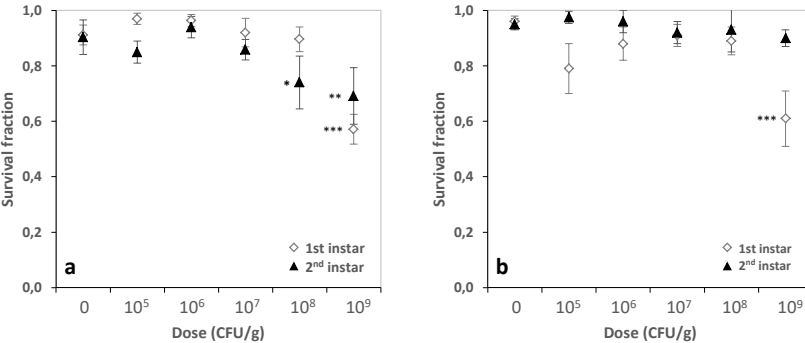

Figure 3

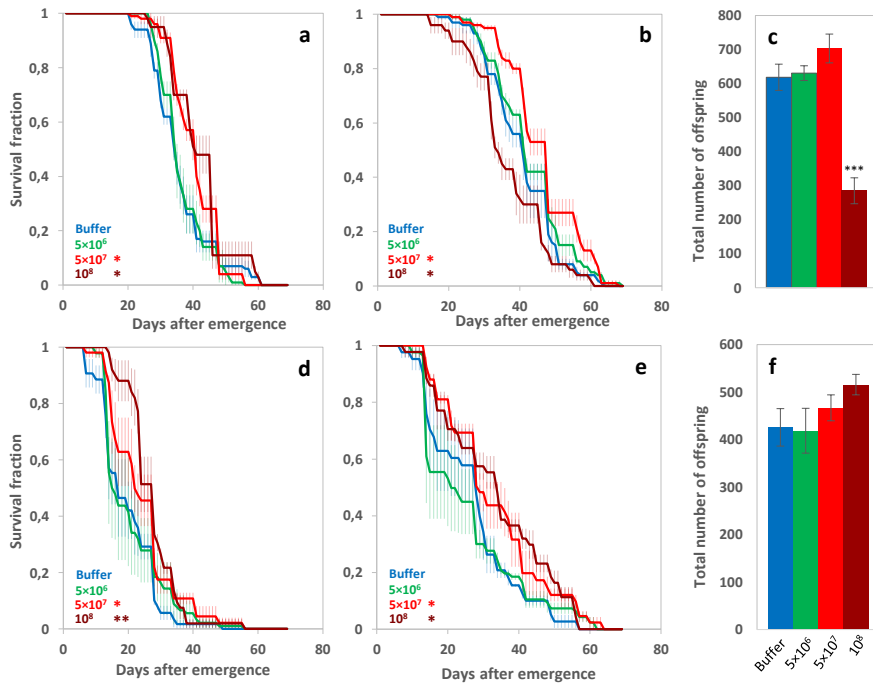

Figure 4

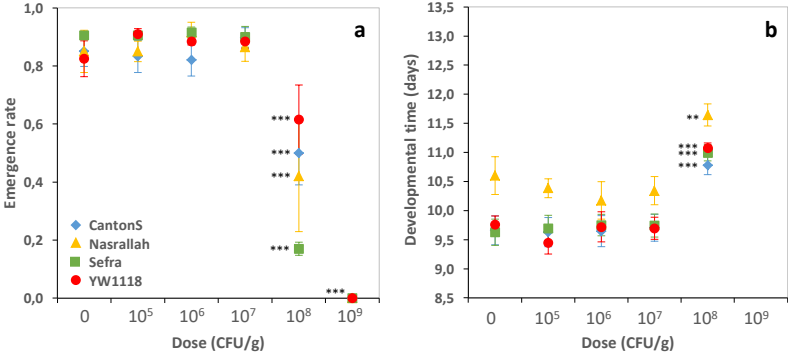



Figure 5

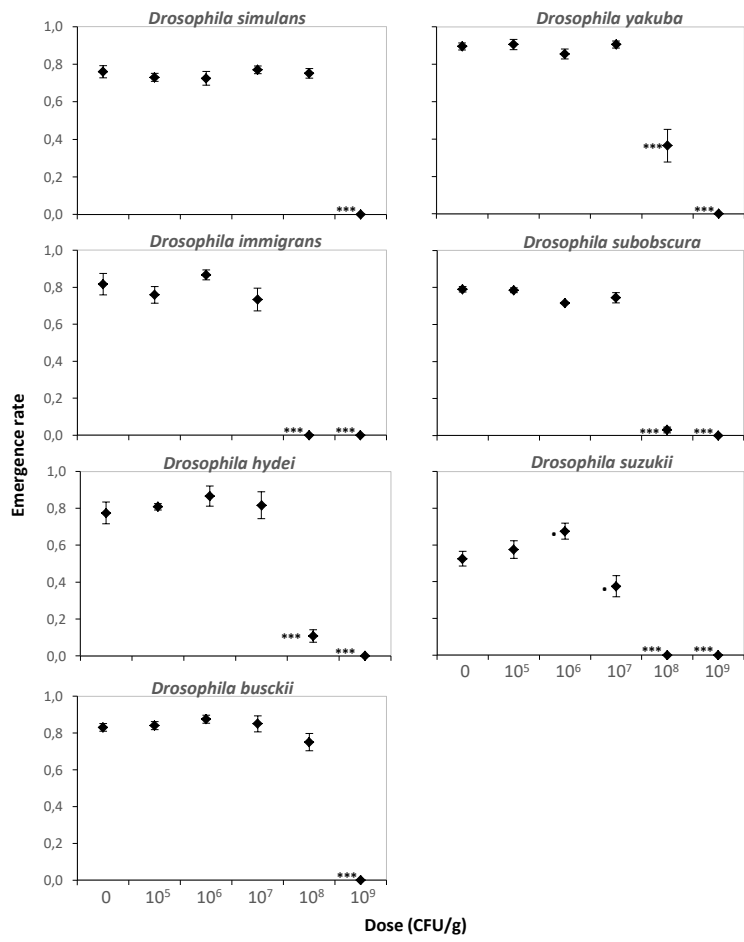

Figure 6

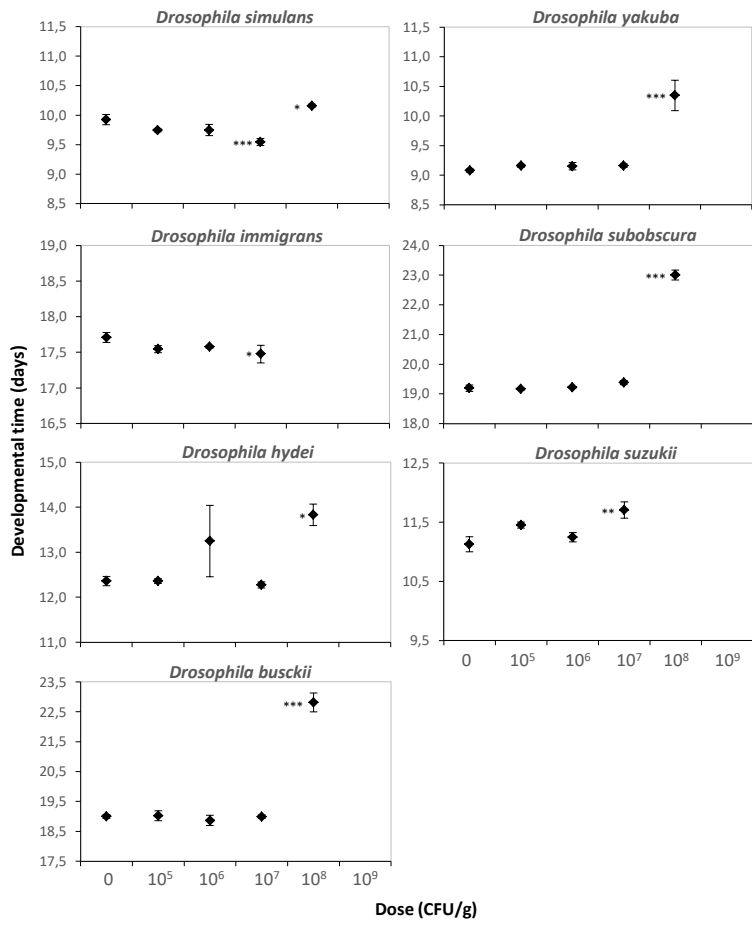

Figure 7

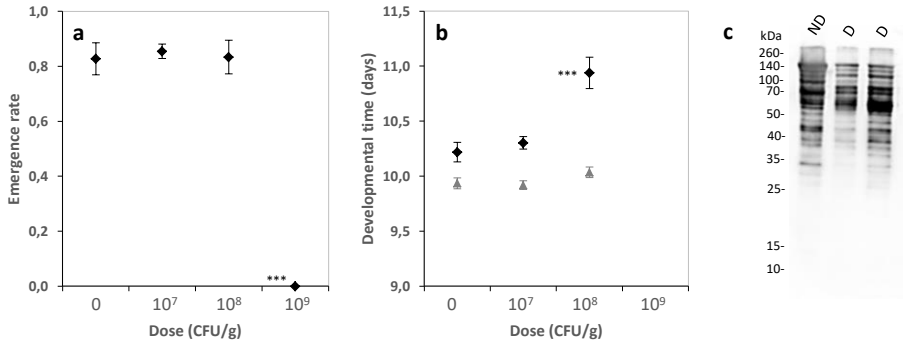

Source: https://www.biorxiv.org/content/10.1101/541847v2.full.pdf
