1 **Differential side-effects of *Bacillus thuringiensis* bioinsecticide on non-target *Drosophila* flies**

2 Aurélie **Babin**, Marie-Paule **Nawrot-Esposito**, Armel **Gallet**, Jean-Luc **Gatti**<sup>§\*</sup>, Marylène **Poirié**<sup>§</sup>

3

4 Université Côte d'Azur, INRAE, CNRS, ISA, France

5

6 **\*Corresponding author**

7 Institut Sophia Agrobiotech, INRAE, 400 route des chappes, 06903 Sophia Antipolis, France.

8 E-mail : [jean-luc.gatti@inra.fr](mailto:jean-luc.gatti@inra.fr)

9

10 **§Co-last authors**

11

12 **Running title:** *Bt* bioinsecticide and *Drosophila* flies

13

14 **Keywords:** *Drosophila*, *D. melanogaster*, *D. suzukii*, *Bacillus thuringiensis*, biopesticide, non-  
15 intentional effects, development, longevity, fitness

16

17 **Word count:** main text: 5 284, abstract: 207

18 **References:** 90

19 **Figures:** 7 figures and 1 table

20 **Supplementary information**

21 **Abstract**

22 Biopesticides based on *Bacillus thuringiensis* (*Bt*) spores and toxins are alternate pest management  
23 solutions widely used to control insect pests. Their increasing use could lead to accumulation in the  
24 environment, hence leading to chronic exposure of non-target organisms. Here, we tested for  
25 potential non-intentional side-effects of chronic exposure to *Bt* biopesticide on larvae of non-target  
26 *Drosophila* species present in *Bt*-treated areas. Doses up to those recommended for field application  
27 ( $\leq 10^6$  CFU/g of fly medium) had no effect on the fly development, whereas doses 10 to 100-fold  
28 higher ( $10^7$ - $10^8$  CFU/g) increased developmental time and decreased adult emergence rates in a  
29 dose-dependent manner and with varying effect amplitudes for all the species and strains tested. For  
30 all them, all larvae died before pupation at the highest dose tested ( $10^9$  CFU/g). Focusing on *D.*  
31 *melanogaster*, delayed development and reduced emergence resulted from stage-dependent larval  
32 mortality, and fitness-related traits of adult flies emerging from surviving *Bt* biopesticide exposure  
33 were moderately increased. The effects of *Bt* biopesticide seemed to result from the spores/cleaved  
34 toxins synergy, and possibly additives. While recommended doses had no effect on non-target  
35 *Drosophila* species, misuse or local accumulation of *Bt* bioinsecticides in the environment could  
36 have non-intentional side-effects on fly populations with potential implications for their associated  
37 communities.

38

39

## 40 **Introduction**

41 The world's population is expected to reach more than 9 billion people by 2050,<sup>[1]</sup> increasing the  
42 demand for agricultural resources. This requires to improve pest management, especially insects  
43 that cause more than 30% of agricultural losses.<sup>[2]</sup> Nowadays, their management largely relies on  
44 conventional chemical insecticides. However, their use and efficiency have been considerably  
45 reduced due to the emergence of pests' resistance, development of secondary pests, adverse side-  
46 effects on non-target species (natural enemies of pests, pollinators),<sup>[3,4]</sup> and more generally the  
47 impacts on biodiversity and human health (e.g. neurological disorders, functional impairment of  
48 reproduction, cancers).<sup>[5-8]</sup> Developed as a more specific and safer alternative, biopesticides  
49 represent less than 5% of the pesticide market, the large majority being microbial insecticide  
50 formulations based on viable spores and toxins of the bacterium *Bacillus thuringiensis* (*Bt*) (over  
51 400 registered formulations).<sup>[4,9]</sup>

52 *Bt* is a Gram-positive endospore-forming bacterium that synthesizes a wide range of toxins  
53 with different chemical structures, modes of action and biological targets. The most abundant and  
54 studied are Cry  $\delta$ -endotoxins encoded by genes located on large plasmids and produced as  
55 parasporal crystalline inclusions during the stationary growth phase.<sup>[10,11]</sup> *Bt* produces other  
56 insecticidal toxins, the Cyt (cytolytic  $\delta$ -endotoxins) and Vip (secreted Vegetative Insecticidal  
57 Proteins) that synergize their effects with Cry toxins, virulence factors such as  $\beta$ -exotoxins (or  
58 thuringiensin), a secreted nucleotide toxic for almost all tested life forms thus prohibited in  
59 commercial formulations,<sup>[12]</sup> and anti-fungal factors.<sup>[13,14]</sup> *Bt* subspecies and strains can differ in  
60 their plasmid number and in the synthesized toxins cocktail responsible for their biological activity,  
61 which was used to delineate potential target insects.<sup>[15]</sup> For instance, *Bt* subsp. *kurstaki* (*Btk*)  
62 produces the 5 Cry toxins, Cry1Aa, Cry1Ab, Cry1Ac, Cry2Aa and Cry2Ab,<sup>[10,16]</sup> while *Bt* subsp.  
63 *israelensis* (*Bti*) produces a combination of Cry4Aa, Cry4Ba, Cry10Aa, and Cry11Aa,<sup>[17,18]</sup> both  
64 strains being commercially used. The different toxin cocktails produced by some *Bt* subspecies can  
65 also be detrimental to non-insect organisms such as nematodes, protozoa, and even molluscs.<sup>[15]</sup>

66 The bioinsecticide formulations based on spores and toxin crystals of *Btk* and *Bti* are the most  
67 sprayed in organic and conventional farming, and natural areas (e.g. forests, swamps) to deal with  
68 larvae of Lepidopteran pests and Dipteran larvae of mosquitoes and black flies, respectively. It is  
69 generally accepted that once ingested by insect larvae, the toxin crystals are dissolved by the midgut  
70 alkaline pH, releasing ~130 kDa pro-toxins that are then processed by digestive proteases into  
71 smaller, soluble, active toxin fragments of ~ 60-70 kDa.<sup>[19,20]</sup> Active toxins bind to specific  
72 receptors of midgut epithelial cells, eliciting pores formation in the cell membrane, cell lysis and  
73 gut epithelium disorganization.<sup>[21,22]</sup> This allows gut bacteria, including *Bt*, to colonize the  
74 hemocoel, and leads to rapid septicaemia and death.<sup>[23,24]</sup>

75 Numerous impact studies of field application rates and acute intoxications have shown that *Bt*  
76 bioinsecticides are safe or have limited impact on non-target vertebrates and invertebrates, and  
77 associated species communities.<sup>[25,26]</sup> However, the increasing use of biopesticides based on *Bt*  
78 spores and toxins has recently raised concern<sup>[27]</sup> and led to the assessment of their potential effects  
79 on non-target species, such as auxiliary insects of biological control,<sup>[28]</sup> pollinators,<sup>[29]</sup> and species  
80 and species communities which simply share their habitat with *Bt*-targeted insect pests.<sup>[30-32]</sup> Yet,  
81 there is growing evidence of direct and indirect cross-effects of *Bt* bioinsecticides and toxins across  
82 insect species and orders, or even across phyla, suggesting that *Bt* targeting is only partly  
83 specific.<sup>[33,34]</sup> Data showed that almost all of the applied *Btk* dose was still present on the leaves  
84 surface 72 hours after spraying,<sup>[35]</sup> its amount returning close to environmental levels only 28 days  
85 after treatment.<sup>[36]</sup> Finally, *Bt* spores can survive in the soil and on different supports for months and  
86 even years after application.<sup>[37-41]</sup> *Bt* formulations contain also numerous compounds to protect  
87 spores and crystals and aggregate them into a wettable form, surfactants to facilitate spraying and  
88 dispersion on plants, and phagostimulants.<sup>[42,43]</sup> Nevertheless, since toxin crystals, and to a much  
89 lesser extent spores,<sup>[44]</sup> are somewhat sensitive to abiotic conditions (e.g. UV, pH, rainfall), repeated  
90 sprayings with a minimum delay of 3 to 8 days is often recommended over the period of pest  
91 occurrence to achieve the required pest control level<sup>[43,45]</sup> (<http://www.certiseurope.fr>,

92 <http://www.certisusa.com>). All these can potentially lead to *Bt* accumulation in the environment,  
93 thus raising the rarely addressed issue of potential side-effects of chronic exposure (*i.e.* continuous  
94 and increasing exposure dose for an extended period) of non-target species to doses unexpectedly  
95 above the recommended spraying doses.

96 Diptera are worldwide distributed insects, most of which are not targets for *Bt* and its toxins.  
97 This is the case of the genus *Drosophila*, represented by ~ 1 500 described species,<sup>[46]</sup> including the  
98 model organism *D. melanogaster*. In the field, most of these flies feed and reproduce mainly on  
99 ripening or rotting/fermenting fruits and are therefore naturally present in areas treated with *Bt* such  
100 as orchards, vineyards and gardening areas. Unable to disperse between food patches, early  
101 developmental stages of *Drosophila* eat intensively and grow exponentially,<sup>[47]</sup> and may thus ingest  
102 high doses of *Bt* bioinsecticides that have accumulated during the treatment periods. Surprisingly,  
103 despite the presence of many *Drosophila* species in *Bt*-treated areas, their role in the decomposition  
104 of organic matter, and the ease of study of some species, only a few studies have focused on these  
105 flies. However, most of them suggested susceptibility to *Btk*, but they used mainly late 3<sup>rd</sup> instar  
106 larvae preparing for pupation, which do not feed much, and used *Bt* preparations, especially field  
107 isolates, that possibly contained highly toxic  $\beta$ -exotoxins, which are not authorized in commercial  
108 *Bt* formulations.<sup>[48-55]</sup> So far, no study addressed the effects of chronic exposure to *Bt* formulations  
109 containing spores and toxin crystals but no  $\beta$ -exotoxins, on developing stages of these Dipterans  
110 that are present in *Bt*-treated areas.

111 Here, we have tested the chronic side-effects of different commercial formulations of *Btk*  
112 (devoid of  $\beta$ -exotoxins) and, to a lesser extent of *Bti*, with doses starting from the maximum  
113 recommended spraying dose up to 1 000 times this dose (*i.e.* below acute intoxication doses used in  
114 most studies). We mainly focused on developmental traits (developmental time, emergence rate),  
115 firstly using the wild-type *D. melanogaster* CantonS. The spore-forming Gram-positive *Bacillus*  
116 *subtilis* and the *Btk* strain (4D22), devoid of Cry toxin genes and thus of crystals, were used as non-  
117 pathogenic controls. We also analysed two fitness-related traits of adult flies (male and female

118 longevity, offspring number) after entire development in presence of *Btk* formulation. To test for  
119 effects specific to the fly genetic background, developmental traits upon exposure to *Btk*  
120 formulation were measured on four other *D. melanogaster* strains. Finally, we extended further  
121 these development experiments to seven other *Drosophila* species. We have chosen six species in  
122 addition to *D. melanogaster*, including cosmopolitan species, which can co-occur in the field<sup>[56-60]</sup>  
123 and are usually present in *Bt*-treated areas, and the invasive *D. sukuzii* that can now co-exist with  
124 the six species in the areas it has recently invaded. This aims at providing a first-step in the  
125 exploration of potential implications of chronic exposure to *Btk* formulation in terms of species  
126 competition and species community composition and dynamics.

127

## 128 **Material and methods**

### 129 *Commercial formulations, Bacillus productions and Colony Forming Unit measurement*

130 The tested commercial brands of *Bacillus thuringiensis kurstaki* (*Btk*; serotype 3a, b, c<sup>[61]</sup>) were  
131 Delfin<sup>®</sup> A and B (strain SA-11; wettable granules, Valent BioSciences, AMM 9200482, 32,000  
132 UI/mg) and Scutello DF (a Dipel<sup>®</sup> sub-brand; strain ABTS-351; wettable granules, Biobest<sup>®</sup>, AMM  
133 2010513, 540g/kg). The commercial brand of *Bacillus thuringiensis israelensis* (*Bti*; strain HD-14;  
134 serotype 14<sup>[61]</sup>) was VectoBac<sup>®</sup> WG (wettable granules, Bayer, AMM 2020029, 3000 UTI/mg). For  
135 each formulation, the number of viable spores (expressed as Colony Forming Units (CFU) per mg  
136 of granules) was estimated using serial dilutions of a suspension on LB agar plates and counting of  
137 bacterial colonies after overnight incubation at 30°C. CFU estimations were  $5 \times 10^7$  CFU/mg for *Btk*  
138 Delfin<sup>®</sup> A;  $2.5 \times 10^7$  CFU/mg for *Btk* Delfin<sup>®</sup> B;  $2.2 \times 10^7$  CFU/mg for *Btk* Scutello DF;  $6 \times 10^7$   
139 CFU/mg for *Bti* VectoBac<sup>®</sup>. Of note, our CFU estimations fell in those appended on the commercial  
140 packaging, between  $10^{13}$  and  $5 \times 10^{13}$  CFU/kg (32 000 UI/mg; <http://www.certiseurope.fr>). No  
141 change in CFU estimations occurred during the time frame of the experiments. Manufacturer-  
142 recommended doses for Delfin<sup>®</sup> range from 0.15 to 1.5 kg/ha depending on the crop type. Based on  
143 our CFU estimations, this corresponds to recommended doses of  $7.5 \times 10^4$  to  $7.5 \times 10^5$  CFU/cm<sup>2</sup> of

144 Delfin<sup>®</sup> A, and  $3.75 \times 10^4$  to  $3.75 \times 10^5$  CFU/cm<sup>2</sup> of Delfin<sup>®</sup> B for each spraying in the field. For  
145 Scutello DF, recommended doses range from 0.1 to 1 kg/ha, which are equivalent to  $2.2 \times 10^4$  to  
146  $2.2 \times 10^5$  CFU/cm<sup>2</sup>. Vectobac<sup>®</sup> WG is used at 0.125 to 1 kg/ha, equivalent to  $7.5 \times 10^4$  to  $6 \times 10^5$   
147 CFU/cm<sup>2</sup>.

148 The acrystilliferous (Cry toxin-free) *Btk* 4D22 strain (depleted for the toxin-encoding  
149 plasmids<sup>[62]</sup>) obtained from the Bacillus Genetic Stock Center (<http://bgsc.org>; Columbus USA),  
150 and a *Drosophila* non-pathogenic *Bacillus subtilis* (gift from Dr. E. Bremer, University of Marburg,  
151 Germany; A. Brun-Barale, pers. comm.) were grown at 30°C in the sporulation-specific medium  
152 PGSM (Bactopectone<sup>®</sup> 7.5 g, KH<sub>2</sub>PO<sub>4</sub> 3.4 g, K<sub>2</sub>HPO<sub>4</sub> 4.35 g, glucose 7.5 g, PGSM salts 5 mL,  
153 CaCl<sub>2</sub> 0.25 M, distilled water qsp 1L, pH 7.2; PGSM salts: MgSO<sub>4</sub>·7H<sub>2</sub>O, MnSO<sub>4</sub>·H<sub>2</sub>O,  
154 ZnSO<sub>4</sub>·7H<sub>2</sub>O, FeSO<sub>4</sub>·7H<sub>2</sub>O) for about 14 days for sporulation to occur. Following elimination of  
155 vegetative cells (1h at 70 °C), spore pellets were collected after centrifugation (4,500 rpm, 20 min,  
156 4 °C), washed with sterile water, and lyophilized. CFU numbers were counted for each preparation  
157 as described above.

158

#### 159 *Fly stocks*

160 The four tested strains of *Drosophila melanogaster* (phylogenetic subgroup: melanogaster) were the  
161 standard wild-type Canton S (Bloomington Drosophila Centre) used as a reference strain, the wild-  
162 type Nasrallah strain from Tunisia (strain 1333, Gif-sur-Yvette), the double mutant standard strain  
163 YW1118 (white and yellow mutations; gift from Dr. B. Charroux, IBD, Marseille-Luminy), and a  
164 recently field-collected strain (caught in Southern France in 2013) that we named “Sefra”. For  
165 *Drosophila* species comparison, we included 6 species of the *Drosophila* subgenus, *D. simulans*  
166 (strain 1132; phylogenetic subgroup: melanogaster), *D. yakuba* (strain 1880; phylogenetic subgroup:  
167 melanogaster), *D. hydei* (phylogenetic subgroup: hydei) and *D. sukukii* (phylogenetic subgroup:  
168 immigrans) (both kindly provided by Dr. R. Allemand, LBBE, University Lyon 1), *D. immigrans*  
169 (phylogenetic subgroup: immigrans), *D. subobscura* (phylogenetic subgroup: obscura), and one

170 species of the *Dorsilopha* subgenus, *D. busckii* (all three species collected in South-East of France  
171 in Spring 2015).

172 All strains and species were maintained at controlled densities (150-200 eggs/40 ml of fly  
173 medium) under standard laboratory conditions (25°C or 20°C for recently collected species, 60 %  
174 relative humidity, 12:12 light/dark cycle), on a high-protein/sugar-free fly medium (10 % cornmeal,  
175 10 % yeast, 0 % sugar). The *D. melanogaster* Canton S strain was also reared on a standard low-  
176 protein/sugar-free fly medium (8 % cornmeal, 2 % yeast, 2.5 % sugar) to test for the influence of  
177 the medium composition on *Btk* exposure effects.

178

#### 179 *Intoxication method and dose-response assay*

180 Commercial formulations and laboratory spore productions were suspended and diluted in buffer to  
181 perform dose-response assays with doses from  $10^5$  to  $10^9$  CFU/g of fly medium. All doses were  
182 prepared in 100  $\mu$ l and homogenized thoroughly with the fly medium (100 $\mu$ l/g). *Drosophila* eggs  
183 and larvae were collected from stock vials at the suitable developmental stage and transferred  
184 carefully to the intoxication vials and dishes, then maintained under standard laboratory conditions  
185 until a) the emergence of adults, or, in the larvae survival tests, b) until a given developmental stage  
186 was reached from the egg, and c) for 24h. Control groups of individuals were transferred on fly  
187 medium homogenized with the same volume of buffer.

188

#### 189 *Development-related traits and larval survival*

190 To evaluate emergence rates and developmental times upon intoxication throughout the entire  
191 development, precise numbers of eggs from mass oviposition were transferred to intoxication vials  
192 containing fly medium mixed with doses of *Bt* formulations or bacteria productions and let to  
193 develop under standard laboratory conditions until the fly emergence. Eggs without chorion and  
194 transparent eggs were discarded. The initial number of eggs was adjusted depending on the species  
195 biology and the vial size: 20 eggs for 2 g of fly medium in small vials ( $\varnothing$  3.3 cm, surface  $\sim$ 8.5 cm<sup>2</sup>,



196 0.24 g/cm<sup>2</sup>) for tests with *D. melanogaster* Canton S, 50 eggs for 6 g of fly medium for comparison  
197 of *D. melanogaster* strains and *Drosophila* species in wider vials (Ø 4.6 cm, surface ~16 cm<sup>2</sup>, 0.37  
198 g/cm<sup>2</sup>) except for *D. hydei*, *D. suzukii* and *D. immigrans* for which 30 eggs were transferred on 6 g  
199 of fly medium. Numbers and sex of emerging flies were recorded once a day until the day the pupae  
200 of the next generation should form. From these data, the emergence rate (proportion of emerged  
201 flies from the initial eggs; ER), the mean developmental time (mean number of days for completion  
202 of development; DT), and the sex-ratio (proportion of male flies; SR) were calculated for each  
203 intoxication vial.

204 For the larval survival tests, 20 eggs or larvae from a 4-hour mass oviposition at the indicated  
205 developmental stage, were transferred to small dishes containing 1 g of fly medium (Ø 3 cm,  
206 surface ~7 cm<sup>2</sup>) homogenized with increasing doses of Delfin<sup>®</sup> A. Surviving larvae were counted at  
207 the indicated developmental stage, or after 24-hour intoxication, to calculate the proportion of  
208 surviving larvae. For the test from the egg, eggs which did not hatch were not included in the  
209 counting. As a control measurement, we measured the pH of the fly medium in the presence of the  
210 dose range of *Bt* formulations (see Supplementary Information S4).

211

#### 212 *Adult fitness-related traits*

213 For the longevity and offspring number tests, males and females emerged from several rearing vials  
214 for each dose of Delfin<sup>®</sup> A were pooled when aged 2 days. Groups of 15 males and 15 females were  
215 transferred into vials with fresh fly medium without formulation. Fly medium was renewed every 3-  
216 4 days. After each fly transfer to fresh food, discarded maintenance vials were incubated under  
217 standard laboratory conditions for the offspring to develop. Mortality and sex of dead flies were  
218 recorded daily until the last fly died. Offspring numbers were counted from the first emergence  
219 until pupae of the next generation appeared. The tests were repeated twice. Due to the variation in  
220 the duration of the two longevity experiments, offspring numbers of each vial were summed to  
221 obtain a total offspring number per dose of Delfin<sup>®</sup> A for each experiment.

222

223 *Dialysis and Cry toxin analysis*

224 A suspension of  $2 \times 10^{10}$  CFU of Delfin<sup>®</sup> A was dialyzed against PBS (KH<sub>2</sub>PO<sub>4</sub> 1.06 mM,  
225 Na<sub>2</sub>HPO<sub>4</sub>(2H<sub>2</sub>O) 3mM, NaCl 154 mM, qsp distilled water, pH 7.2), at 250 rpm, 4°C overnight,  
226 using an 8-10 kDa MW cut-off membrane (ZelluTrans, Roth<sup>®</sup>). The CFUs of the dialyzed  
227 suspension and the effects on emergence rate (ER) and developmental time (DT) were analysed as  
228 described above. The dialyzed suspension was also subject to a 12.5 % SDS-PAGE and compared  
229 to the non-dialyzed suspension after silver staining. The presence of Cry1A pro-toxins, activated  
230 toxins and toxin fragments was probed by Western-blot using an in-house anti-Cry1A rabbit  
231 polyclonal antibody.

232

233 *Data analysis*

234 Data on development traits (emergence rate ER and developmental time DT), sex-ratio (SR),  
235 survival of larval stages and offspring number were analysed with mixed effect models including  
236 the dose of *Btk* formulation/spore production, the *D. melanogaster* strain, the *Drosophila* species or  
237 the developmental stage as fixed effects, and replicate (plus the experiment when necessary) as  
238 random effects (for ER data, data were analysed with bias-corrected models with replicate as fixed  
239 effect to allow pairwise comparisons; similar results obtained with models including replicate as  
240 random effect). ER, SR and survival of larval stages were analysed with generalized linear models,  
241 with binomial distribution and logit link. DT and offspring number were analysed with linear  
242 models. DT were transformed into developmental rates (1/developmental time) to fulfil the  
243 assumptions of the analysis of variance (homoscedasticity and residuals normality). Adult longevity  
244 data were analysed with proportional hazard Cox regression models including fly sex and dose of  
245 *Btk* formulation as fixed effects, and replicates as a random effect. For all the data sets, the main  
246 fixed effects and their interactions were tested with log-likelihood ratio tests. *Post hoc* pairwise  
247 comparisons were made for pairs of *D. melanogaster* strains, formulation/spore treatments, and

248 between the control dose and the other doses. All the analyses were performed in R<sup>[63]</sup> using the  
249 packages lme4,<sup>[64]</sup> brglm,<sup>[65]</sup> multcomp,<sup>[66]</sup> survival,<sup>[67]</sup> and coxme.<sup>[68]</sup>

250

## 251 **Results**

### 252 ***Btk* formulations adversely impact the development of *D. melanogaster*.**

253 The wild-type Canton S strain of *D. melanogaster* was used to evaluate the dose-dependent effect  
254 of the commercial *Btk* formulation Delfin<sup>®</sup> A on the emergence rate (ER, proportion of emerged  
255 flies from the initial egg pool) and developmental time (DT, mean number of days from egg to adult  
256 emergence). Eggs were transferred on a standard low-protein/high-sugar fly medium containing  
257 Delfin<sup>®</sup> A at doses ranging from  $5 \times 10^5$  CFU/g of medium (mean equivalent of the maximum  
258 recommended doses for one field application; see Methods and Supplementary information S1) to  
259  $10^9$  CFU/g (~ 1,000 times the recommended dose). To check for specific effects of *Btk* formulations  
260 and the respective role of *Btk* spores and Cry toxins, we tested the same dose range of the  
261 commercial *Bti* formulation Vectobac<sup>®</sup> targeting mosquitoes that contains different Cry toxins,<sup>[22]</sup>  
262 of the Cry-free strain *Btk* 4D22, and of the *Drosophila* non-pathogenic spore-forming *Bacillus*  
263 *subtilis*.

264 Developmental traits (ER and DT) of exposed and non-exposed control flies were similar at  
265 doses up to  $10^7$  CFU/g of Delfin<sup>®</sup> A (Fig. 1a-b; Table 1). At higher doses, both ER and DT were  
266 affected in a dose-dependent manner: ER was reduced by 17% at  $5 \times 10^7$  CFU/g (although not  
267 statistically significant), up to 100% at  $10^9$  CFU/g, dose at which no individual reached the pupal  
268 stage. The lethal dose 50 (LD50) was estimated between  $5 \times 10^7$  and  $10^8$  CFU/g (Fig. 1a). DT was  
269 increased of about 0.5 day at  $5 \times 10^7$  CFU/g (+4% compared to controls), up to 1.5 days (+14%) at  
270  $10^8$  CFU/g (Fig. 1b; Table 1). The sex-ratio at emergence (SR, proportion of males) was strongly  
271 biased towards males at the highest dose at which complete development occurred ( $10^8$  CFU/g),  
272 with 58% more males compared to controls (Supplementary information S2). Because addition of  
273 *Btk* formulation could modify parameters of the fly medium and thus contribute to these effects, we

274 checked the pH of the medium: the presence of formulation and its dose had no effect on it  
275 (Supplementary information S4).

276 We observed no change in ER using the same dose range of the *Btk* Cry-free strain 4D22 (Fig.  
277 1a, 1e; Table 1) and the non-pathogenic *Bacillus subtilis* (Fig. 1a, Table 1). Addition of *Bti*  
278 Vectobac<sup>®</sup> did not affect ER up to 10<sup>8</sup> CFU/g but reduced it by 89% at 10<sup>9</sup> CFU/g (~2,000 times the  
279 highest recommended dose for field application; Fig. 1a; Table 1; Supplementary information S1).  
280 DT varied with the dose of *Btk* 4D22, the differences being mainly between doses but not with the  
281 control. DT increased by ~1.5 days at the highest dose of Vectobac<sup>®</sup> (Fig. 1b; Table 1) and showed  
282 a similar trend with *B. subtilis* ( $P = 0.06$ ; Fig. 1b; Table 1). None of these three treatments  
283 influenced dramatically the SR, the slight decrease in male proportion for most of the Vectobac<sup>®</sup>  
284 doses being due to the higher average sex-ratio for the control dose compared to those for the two  
285 other treatments (Supplementary information S2).

286 To test whether these effects are generic to *Btk* formulations, the fly development was  
287 evaluated on two other formulations, Delfin<sup>®</sup> B (same brand) and Scutello DF (brand Dipel<sup>®</sup>), at the  
288 critical doses 10<sup>8</sup> and 10<sup>9</sup> CFU/g. As Delfin<sup>®</sup> A, these formulations contain spores and Cry toxins  
289 such as Cry-1A as pro-toxins of ~130 kDa, activated toxins of ~60-70 kDa, but also as smaller  
290 fragments<sup>[20]</sup> (Fig. 1e, red asterisks). ER remained unchanged at 10<sup>8</sup> CFU/g whereas no individual  
291 reached pupation at 10<sup>9</sup> CFU/g on Delfin<sup>®</sup> B and very few individuals reached the adult stage on  
292 Scutello DF<sup>®</sup>, DT being increased by more than 2 days (Fig. 1c-d; Table 1). No significant bias in  
293 SR was observed for either formulation (Supplementary information S2).

294

### 295 **Adverse effects of *Btk* formulation strongly impact the early development.**

296 Larval stages were assessed for their susceptibility to *Btk* formulation in two independent and  
297 complementary dose-response tests of survival to Delfin<sup>®</sup> A, at doses ranging from 10<sup>5</sup> to 10<sup>9</sup>  
298 CFU/g of high protein/sugar free medium (this medium is used to rear fly species which are  
299 difficult to rear in the lab (see below) and is less limiting for the development of early larval stages).

300 We focused on the 1<sup>st</sup> and 2<sup>nd</sup> larval instars, during which growth is exponential,<sup>[47]</sup> so that larvae  
301 are most heavily exposed to the bioinsecticide. In the first test, the cumulative survival was  
302 measured by counting alive late 1st and 2nd instar larvae which have been exposed to Delfin<sup>®</sup> A  
303 from the egg stage. Larval survival was not influenced at 10<sup>7</sup> CFU/g, whereas it decreased for both  
304 larval instars above that dose to reach up to 37% mortality at 10<sup>9</sup> CFU/g (Fig. 2a). Reduced survival  
305 tended to occur at a lower dose when cumulative survival was measured later in the development,  
306 *i.e.* 10<sup>9</sup> for late 1<sup>st</sup> instar larvae and 10<sup>8</sup> CFU/g for 2<sup>nd</sup> instar larvae (Fig. 2a; Table 1). For both  
307 instars, larvae surviving 10<sup>9</sup> CFU/g were noticeably smaller and less active than those surviving  
308 lower doses. In emergence assays with planned exposure from the egg to the adult stage, none of  
309 these individuals reached the pupal stage (see results above). In the second test, larval survival was  
310 measured after early 1<sup>st</sup> and 2<sup>nd</sup> instar larvae had been exposed for 24 hours to Delfin<sup>®</sup> A. Survival  
311 of 1<sup>st</sup> instar larvae decreased by 36% on 10<sup>9</sup> CFU/g whereas that of 2<sup>nd</sup> instar larvae did not change  
312 (Fig. 2b, Table 1).

313

314 **Developmental exposure to *Btk* formulation does not strongly influence fitness-related traits**  
315 **in adults.**

316 Long-term consequences on flies of exposure to *Btk* formulation throughout the development were  
317 evaluated on two fitness-related traits, longevity and total offspring number. Traits were measured  
318 on a *Btk*-free low-protein/high-sugar medium after individuals had completed their development on  
319 the same fly medium but in presence of selected doses of Delfin<sup>®</sup> A: 5×10<sup>6</sup> CFU/g, which had no  
320 impact on development, and 5×10<sup>7</sup> and 10<sup>8</sup> CFU/g, which caused moderate and strong development  
321 alterations, respectively (see Fig. 1a).

322 Adult longevity was analysed in two independent sets of experimental replicates on groups of  
323 15 females and 15 males held together. Despite large variation between the two sets of experimental  
324 replicates (Table 1), the longevity of adults reared on 5×10<sup>6</sup> CFU/g of Delfin<sup>®</sup> A was similar to that  
325 of non-exposed controls (Fig. 3). Males and females which developed on the two higher doses

326 showed a moderate longevity benefit, higher in females for  $10^8$  CFU/g (Fig. 3a-b, d-e; Table 1).  
327 Males generally survived better than females (Table 1) but their longevity benefit of developing on  
328  $10^8$  CFU/g was only observed in the second experiment (Fig. 3b, e).

329 The female offspring number - the sum of offspring produced by the 15 females of each fly  
330 group during the longevity experiment - varied depending on both the experiment and the Delfin<sup>®</sup> A  
331 dose (Table 1). In the 1<sup>st</sup> experiment, adults from larvae reared on  $10^8$  CFU/g had fewer offspring  
332 compared to control adults and to adults developed on the other doses whereas the total offspring  
333 number varied regardless of the *Btk* dose in the 2<sup>nd</sup> experiment (Fig. 3c, f, Table 1).

334

335 ***Btk*-formulation dose-dependent alterations of development are not specific to the *D.***  
336 ***melanogaster* Canton S strain.**

337 Dose-dependent effects of *Btk* formulation on the development were tested on three additional *D.*  
338 *melanogaster* strains: the wild-type Nasrallah (strain 1333), the wild-type Sefra population reared in  
339 the laboratory for 4 years, and the double mutant YW1118. The emergence rates (ER) and  
340 developmental times (DT) were measured on a high-protein/sugar-free medium (rearing medium of  
341 these strains) mixed with Delfin<sup>®</sup> A doses ranging from  $10^5$  to  $10^9$  CFU/g. To allow the comparison  
342 with previous results with Canton S flies on low-protein/high sugar fly medium, Canton S was also  
343 reared and tested on the high-protein/sugar-free medium along with the other strains.

344 None of the fly strains was impacted at doses up to  $10^7$  CFU/g, whereas ER was strongly  
345 reduced and DT was increased at higher doses for all the strains (Fig. 4a-b, Table 1), with no  
346 individual reaching the pupal stage at  $10^9$  CFU/g (LD50 between  $10^8$  and  $10^9$  CFU/g). At  $10^8$   
347 CFU/g, the magnitude of effects on Canton S flies was lower than that observed on the low-  
348 protein/high-sugar medium. At this dose, ER varied between strains, the largest reduction being  
349 observed for Sefra (Table 1). We observed no dose-dependent bias in SR (Supplementary  
350 information S3).

351

352 ***Btk* formulation also affects other *Drosophila* species, including the invasive pest *D. suzukii*.**

353 The ER and DT were analysed for seven other *Drosophila* species from different phylogenetic  
354 clades at doses of Delfin<sup>®</sup> A from 10<sup>5</sup> to 10<sup>9</sup> CFU/g of high-protein/sugar-free medium (rearing  
355 medium of all the species). Tested species were *D. simulans* (*D. melanogaster* sister species), the  
356 African *D. yakuba*, *D. subobscura*, *D. immigrans*, *D. hydei*, and the invasive *D. suzukii*, all  
357 belonging to the *Drosophila* subgenus, and *D. busckii* from the *Dorsilopha* subgenus. For all the  
358 species, doses up to 10<sup>6</sup> CFU/g of Delfin<sup>®</sup> A had no effect on ER and DT whereas all individuals  
359 failed to reach the pupal stage and no fly emerged at 10<sup>9</sup> CFU/g (Fig. 5-6). Amplitudes of  
360 development alterations at 10<sup>7</sup> and 10<sup>8</sup> CFU/g varied between species (Fig. 5-6; Table 1). All  
361 species were affected at 10<sup>8</sup> CFU/g as was *D. melanogaster* (see Fig. 4a for comparison). *D.*  
362 *simulans* and *D. busckii* had unchanged ER, but DT was slightly increased for *D. simulans*  
363 (although slightly reduced at 10<sup>7</sup> CFU/g; similar results with a Japanese strain, data not shown) and  
364 strongly increased for *D. busckii* (by 20%, *i.e.* ~ 4 days) (Fig. 5-6, Table 1). *D. yakuba* ER and DT  
365 were similar to those of *D. melanogaster*, with an LD50 around 10<sup>8</sup> CFU/g and a moderate DT  
366 increase of ~ 1 day (Fig. 5-6, Table 1; similar results with a strain from Sweden, data not shown).  
367 The ER of *D. hydei* and *D. subobscura* were very low at 10<sup>8</sup> CFU/g (LD50 below this dose), with a  
368 high DT (Fig. 5-6; Table 1), while *D. immigrans* did not survive. No *D. suzukii* individual emerged  
369 at 10<sup>8</sup> CFU/g and development was already moderately impacted at 10<sup>7</sup> CFU/g (Fig. 5-6). No dose-  
370 dependent bias in SR was detected for either species (Supplementary information S5).

371

372 **Development alterations may result from a synergy between formulation components.**

373 *Bt* spores and toxins can represent more than half the weight of commercial formulations (85% for  
374 Delfin<sup>®</sup>, <http://www.certisusa.com>), with up to about 10% of insecticidal protein toxins within this  
375 fraction, mainly Cry pro-toxins and activated toxins<sup>[69]</sup> (see Fig. 1e). The remaining weight consists  
376 of various compounds such as residues of culture medium and various additives including  
377 surfactant, anti-foaming agents, etc...<sup>[25,43]</sup> It has been shown that, for some products, additives can

378 be more harmful in some cases than the active ingredient,<sup>[70]</sup> we explored the role of small  
379 diffusible molecular weight components of Delfin<sup>®</sup> A in the alterations of ER and DT of *D.*  
380 *melanogaster* Canton S. For that, we mixed a 10 kDa dialyzed suspension of Delfin<sup>®</sup> A at 10<sup>7</sup>, 10<sup>8</sup>,  
381 and 10<sup>9</sup> CFU/g with low-protein/high-sugar medium. ER and DT were unaffected by the presence  
382 of the dialyzed suspension at the 10<sup>7</sup> CFU/g dose, whereas no individual reached the adult stage (no  
383 pupation) with the suspension at the 10<sup>9</sup> CFU/g dose (Fig. 7a; Table 1). At 10<sup>8</sup> CFU/g, ER was not  
384 modified but DT increased by ~ 1 day, only in one of the two experiments, partially reproducing the  
385 changes observed without dialysis (Fig. 7a-b; see also Fig. 1a-b, Table 1; 3 independent  
386 experiments for ER, 2 independent experiments for DT).

387 Cry1A profiles of dialyzed Delfin<sup>®</sup> A suspensions, like those of the non-dialyzed ones,  
388 comprised 130-kDa pro-toxins and 60-70 kDa activated toxins, but also showed toxin degradation  
389 as evidenced by additional smaller fragments of activated toxins (Fig. 7c). The respective roles of  
390 *Btk* toxin fragments and spores in the alterations of *D. melanogaster* development were further  
391 explored through experiments of dialysis such as those previously described, followed by  
392 successive centrifugations to eliminate most of the spores and toxin crystals. Despite variation  
393 between experiments, ER was strongly affected only in one of the three experiments while DT was  
394 always significantly increased when flies were reared in presence of centrifuged supernatants that  
395 contained a limited range of Cry 1A toxin fragments (Supplementary information S6).

396

## 397 **Discussion**

398 The increasing use of bioinsecticides based on *Bacillus thuringiensis* (*Bt*) raises concern about their  
399 potential non-intentional side-effects on non-target organisms, and biodiversity in general, due to  
400 their partially specific targeting,<sup>[33,34,71]</sup> persistence in the environment,<sup>[35,36,38,40,41,44,72]</sup> and the  
401 requirement of and recommendations for repeated spraying to reach the desired pest control  
402 level.<sup>[43]</sup> Especially, side-effects of chronic exposure on non-target organisms, including insects  
403 present on treated areas, remain under-evaluated. Here, we have tested the side-effects of ingestion



404 of *Bt* bioinsecticide formulations (mainly made of *Bt kurstakii* strains (*Btk*) but also of *Bt israelensis*  
405 (*Bti*)) throughout the entire development of several non-target species of *Drosophila* flies which are  
406 naturally present in treated areas. While formulation doses up to those recommended for each field  
407 sprayings ( $\leq 10^6$  CFU/g of medium) had no effect on *Drosophila* development, mortality and/or  
408 developmental delay occurred markedly from doses only 10 times and 50 times higher than the  
409 maximum recommended dose of the main tested *Btk* formulation for *D. suzukii* ( $10^7$  CFU/g) and the  
410 *D. melanogaster* strains ( $5 \times 10^7$  CFU/g), respectively. Development alterations were already strong  
411 at these doses, suggesting the occurrence of alterations already at lower doses, i.e. between  $10^6$  and  
412  $10^7$  CFU/g for *D. suzukii*, and between  $10^7$  and  $5 \times 10^7$  CFU/g for *D. melanogaster* strains. Accurate  
413 analyses would be needed to verify this possibility. Besides, all the tested species, except *D.*  
414 *simulans*, were strongly affected at  $10^8$  CFU/g, and no (or extremely limited) fly development  
415 occurred at the highest tested dose ( $10^9$  CFU/g), equivalent to 1000 times the maximum  
416 recommended dose but far below common acute intoxication doses used in many studies.<sup>[5]</sup>  
417 Recommended doses are those for each spraying on a homogeneous and dry zone without covering  
418 areas. In the field, recommended repeated sprayings of stabilized formulation and rainfall washouts  
419 following spraying may increase *Bt* spores and toxins presence in both space and time. While the  
420 highest dose tested here ( $10^9$  CFU/g) would be hardly reached in the field as those for acute  
421 intoxications, the minimal doses at which the fly development was markedly impacted and the  
422 lower ones from which changes in development appeared may be readily obtained. Furthermore, the  
423 minimal quantity of *Bt* formulation inducing development alterations may be even lower since a  
424 single *Drosophila* larva is unlikely to process 1g of medium given its size and feeding rate. Our data  
425 also evidenced a window of *Btk* susceptibility during larval development, with the ingestion during  
426 the 1<sup>st</sup> larval instar accounting for a large part of the observed detrimental effects on the  
427 development (see below in the discussion).

428         When testing for non-intentional generic effects of *Bt* formulations, similar patterns of  
429 development alterations were observed but shifted to higher doses with two other *Btk* formulations

430 and a formulation of *Bti*: there was no effect on *D. melanogaster* development at the doses up to  $10^8$   
431 CFU/g but a strong detrimental effect at the highest dose tested,  $10^9$  CFU/g. The three *Btk*  
432 formulations tested, based on two different bacterial strains (see Methods), had similar profiles of  
433 Cry1A protoxins and activated toxins, but they differed in their efficient spore contents, formulation  
434 type, and likely additives, which may account for the observed variation in the half-lethal dose. The  
435 *Bti* formulation, widely used against Dipteran Nematocera insects (e.g. mosquitoes, black flies),<sup>[73]</sup>  
436 impacted *D. melanogaster* development only at the highest dose tested. The impacts of *Btk*  
437 formulations on *D. melanogaster* development are consistent with growing evidence suggesting a  
438 partly specific targeting of *Bt*.<sup>[33,74]</sup> Until recently, it has been generally accepted that the mode of  
439 action of *Bt* after ingestion by insects relies on key steps of specific binding of proteolyzed *Bt* toxins  
440 to receptors of midgut epithelial cells, defining targets for each *Bt* subspecies.<sup>[15,19,22]</sup> Several  
441 primary and secondary types of toxin receptors, including cadherin-like proteins, aminopeptidases,  
442 GPI-anchored alkaline phosphatases,<sup>[10]</sup> and more recently the ATP dependent binding cassette  
443 reporter C2,<sup>[75]</sup> have been identified in Lepidoptera and Diptera mosquitoes. Focusing on the action  
444 of *Btk* targeting Lepidoptera, no Lepidoptera cadherin-like Cry receptor orthologues were found in  
445 *Drosophila*,<sup>[75]</sup> supporting the idea that these flies would not be affected by the spraying of *Btk*  
446 formulation. The existence of other types of Cry receptors in *Drosophila* flies would explain the  
447 observed developmental impacts but remains to be investigated. In addition, the substantial amounts  
448 of active Cry1A toxin fragments in *Btk* formulations could compensate for the possible lack of  
449 solubilization of protoxin crystals in the fly midgut and proteolytic activation of toxins by fly gut  
450 proteases, both required for Cry activity in insect larvae.<sup>[19]</sup> Other toxins synthesized by *Btk* and  
451 present in the formulations could also play a role in the observed cross-order activity as some, such  
452 as Cry2A, have an insecticidal effect on both Lepidoptera and Diptera.<sup>[76]</sup>

453 The lack of effect of ingestion of *Bacillus subtilis* or *Btk* Cry-free 4D22 on the development  
454 of *D. melanogaster* excludes that development alterations result from severe disruption of digestion  
455 and nutrient uptake/competition in the presence of high spore/bacteria loads in the larval gut

456 throughout development. It supports the idea of a synergistic action of *Btk* spores and Cry toxins,  
457 consistent with the models of *Bt* action on insect larvae in which toxins first breach the gut  
458 epithelium, allowing the gut content, including *Bt* spores, to colonize the hemocoel.<sup>[19,22-24]</sup> The  
459 partially reproduced mortality rate and delayed development in dialysis experiments may further  
460 indicate that low diffusible molecular weight compounds in *Btk* formulations (e.g., culture media  
461 residues, salts, additives) may contribute to these development alterations. This is supported by the  
462 lack of impact on *D. melanogaster* development of the ingestion of laboratory-produced spores and  
463 Cry toxins of a *Btk* 4D1 strain (or HD1, a reference strain used as a control strain here, not used in  
464 commercial formulations) used without additives, even at the highest dose  $10^9$  CFU/g (additional  
465 information S7; Fig. S7a, b). The *Btk* 4D1 culture contained few active Cry toxins and smaller toxin  
466 fragments, in contrast to commercial *Btk* formulations (Fig. S7e), supporting the possible  
467 contribution of these toxin fragments to the cross-order activity of *Btk* formulations on *Drosophila*.

468 As previously reported for *D. suzukii* exposed to laboratory-produced *Btk* cultures,<sup>[53]</sup>  
469 mortality of *D. melanogaster* during development on *Btk* formulation occurred early in  
470 development. First and second instars larvae are likely highly exposed due to their high feeding rate  
471 and their exponential growth.<sup>[77]</sup> As the observed larval mortality was only about 40% at the highest  
472 dose ( $10^9$  CFU/g) (Figure 2), while none of the individuals reached the pupal stage at this dose  
473 (Figure 4), the remaining mortality likely occurred during the third larval stage, maybe due to a  
474 delayed action of *Btk* spores and toxins. Interestingly, alterations of the development (mortality and  
475 delayed emergence) mimicked those typically generated by nutritional stress conditions in insect  
476 larvae.<sup>[78,79]</sup> Accordingly, the development alterations were partially rescued on a protein rich fly  
477 medium, probably through compensatory protein intake, as in other arthropod species.<sup>[79-81]</sup> In  
478 addition, the sex ratio of flies was strongly biased towards males after development on the dose of  
479 *Btk* formulation affecting fly emergence ( $10^8$  CFU/g) and under low protein conditions. This  
480 highlights the importance of nutritional conditions in *Btk* impacts on *Drosophila* development, with  
481 sex-specific differences in larval susceptibility to environmental stressors, here the accumulation of

482 *Btk* formulation, under protein restriction conditions as reported previously in *D. melanogaster*.<sup>[82]</sup>

483 The development on sublethal doses of *Btk* formulation did not dramatically affect the  
484 longevity of *D. melanogaster* adults and the lifetime offspring number. Developmental exposure to  
485 *Btk* doses that slightly and strongly reduced the likelihood of reaching the adult stage even gave to  
486 males and females a dose-dependent longevity benefit, in addition to the male higher longevity  
487 observed in mixed-sex populations,<sup>[83]</sup> and slightly increased the offspring number (although not  
488 significantly). Surviving the exposure to *Btk* formulation throughout the development has likely  
489 selected for fitter individuals. This is similar to the increased longevity of adult insects that have  
490 survived developmental nutritional stress,<sup>[84,85]</sup> or are resistant to environmental stressors.<sup>[83]</sup>

491 The origin of *Drosophila* (species and population/strain) influenced the magnitude of the  
492 development alterations induced by *Btk* formulation. For *D. melanogaster*, all the strains tested  
493 were susceptible to *Btk* formulation with both mortality and delayed development at the same dose,  
494 but with variation in the effect magnitudes. This suggests potential population-specific differences  
495 in susceptibility to *Btk* formulation accumulation in the environment, and hence potential spatial  
496 and temporal heterogeneity of *Btk* spraying impacts for each *Drosophila* species. Among the other  
497 seven species tested, differences in susceptibility to *Btk* formulation, in terms of effect magnitude  
498 and type of development alteration (mortality and/or developmental delay), occurred between  
499 *Drosophila* species, regardless of their phylogenetic distances. For the *Drosophila* subgenus, *D.*  
500 *simulans* was less susceptible than its sister species *D. melanogaster*, whereas the African *D.*  
501 *yakuba* experienced similar impacts on the development as *D. melanogaster*. The three species *D.*  
502 *immigrans*, *D. subobscura* and *D. hydei* were similarly more susceptible than *D. melanogaster*, but  
503 with slight differences in effect magnitudes. The phylogenetically distant *D. busckii* (*Dorsilopha*  
504 subgenus) was the least affected of all the species tested in terms of developmental mortality, but its  
505 development was strongly delayed. The five species *D. melanogaster*, *D. simulans*, *D. hydei*, *D.*  
506 *immigrans*, and *D. busckii* belong to the guild of cosmopolitan domestic *Drosophila* species, *D.*  
507 *subobscura* is sub-cosmopolitan species, and *D. busckii* is an opportunistic frugivorous species.<sup>[86]</sup>

508 All these species coexist frequently and compete on the same discrete and ephemeral rotting fruit  
509 patches, with seasonal variations in the composition of the fly community.<sup>[56-59]</sup> At the community  
510 level, differences in the species susceptibility to accumulation of *Btk* formulation could modify  
511 larval competition conditions and lead to additional local and temporal variations in *Drosophila*  
512 communities' composition. The potential side-effects of *Bt* sprays on non-target *Drosophila*  
513 communities would be hardly predictable as they would depend on spatial patterns of *Bt*  
514 accumulation. A formal mesocosm study of *Drosophila* community dynamics under exposure to  
515 *Btk* formulation, at least under semi-field conditions, would allow assessing the consequences of *Bt*  
516 accumulation on species competition and community composition.

517 As for the other species, the presence of *Btk* formulation impacts the development of the  
518 invasive *D. suzukii*, as recently reported by Cossentine et al.,<sup>[53]</sup> this species being the most  
519 susceptible here with effects already clearly detectable at 10 times the recommended spraying dose.  
520 Compared with the other seven species that live on rotten fruits, *D. suzukii* poses a threat to fruit  
521 production because it feeds and lays eggs in healthy ripening soft fruits<sup>[87-89]</sup> and hence colonizes  
522 orchards and vineyards earlier during the fruit season. Despite its oviposition mode with a saw-like  
523 ovipositor inserted inside ripening soft fruits,<sup>[87]</sup> the exposure of *D. suzukii* larvae may be quite  
524 similar to that of larvae of other *Drosophila* species laying on the surface of fermenting fruits or  
525 rotting fruit flesh. Indeed, the saw-like ovipositor likely carries *Bt* spores and toxins from the  
526 surface of treated fruits when piercing the fruit skin, and additional *Bt* may then enter the fruit  
527 through the drilled holes. From an ecological point of view, the greater susceptibility of *D. suzukii*  
528 to the accumulation of *Btk* formulation in the environment might mitigate the potential ecological  
529 burden of its invasion for local communities of *Drosophila* frugivorous species in orchards.  
530 Alternatively, as *D. suzukii* attacks on fruits can accelerate their decomposition by microorganisms,  
531 its higher susceptibility to *Btk* could reduce the number of fruits made suitable for other *Drosophila*  
532 species.

533 In conclusion, our results showed that at recommended *Bt* doses, no visible effects on

534 *Drosophila* was observed, but repeated sprayings and subsequent accumulation of *Btk* biopesticide  
535 above these doses can potentially impact these non-target insects. The magnitude of this impact  
536 possibly depends on both the formulation used and the insect species. Although our study was  
537 carried out under controlled laboratory conditions which may dramatically differ from natural  
538 conditions encountered in the field (temperature, pH, humidity, food availability, photoperiod,  
539 predator/parasite/pathogen pressures, etc...), standard laboratory strains and flies derived from wild  
540 populations recently collected exhibited similar patterns of development alterations, suggesting our  
541 results may not be specific to laboratory-influenced genetic backgrounds. Recent studies have  
542 reported similar adverse side-effects due to repeated sprayings of the *Bti* formulation, directly on  
543 non-target organisms,<sup>[31]</sup> and indirectly on predators via food webs.<sup>[90]</sup> These studies and the data  
544 presented here highlight that pest control with *Bt* bioinsecticides should be done with caution in the  
545 field to avoid, or at least limit, potential non-intentional side-effects on non-target organisms and  
546 hence on biodiversity. At last, *D. melanogaster*, a model species in many research fields, could also  
547 serve as a study model to identify the mechanisms underlying these side-effects and/or the potential  
548 emergence of resistance to these biopesticides.

549

## 550 **Acknowledgements**

551 We thank Xiao Han, Jingru Li and Abir Oueslati for help with preliminary experiments, L.  
552 Kremmer, C. Rebuf and O. Magliano for providing and rearing flies and help in preparing fly  
553 medium, A. Brun-Barale for the *Bacillus subtilis* spores, D. Pauron for preparation of Cry1A toxin,  
554 Hugo Mathé-Hubert for advice on statistical analyses, and M. Amichot for helpful discussions. The  
555 Cry1A antibody was produced in collaboration with the INRA-PFIE platform (Nouzilly, France).

556

## 557 **Financial Supports**

558 This work was supported by the French National Agency for Research (ANR-13-CESA-0003-001  
559 ImBio), the European Union's Seventh Framework Program for research, technological

560 development and demonstration under grant agreement No. 613678 (DROPSA), the "Investments  
561 for the Future" LABEX SIGNALIFE (ANR-11-LABX-0028), the INRA Plant Health Department  
562 (to MPNE and JLG), the CNRS (to AG), and the University Nice Côte d'Azur (to MP).

563

#### 564 **Author contributions**

565 AB, MPNE, AG, JLG and MP designed the experiments. AB performed the experiments with  
566 contributions of MPNE. AB performed the statistical analyses. AB, JLG, and MP wrote the  
567 manuscript with contributions from all the authors.

568

#### 569 **Additional information:**

#### 570 **Supplementary information**

571

572 **Competing interest:** The authors declare no competing interests.

573

#### 574 **References**

- 575 1. United Nations, Department of Economic and Social Affairs, Population Division 2015. World  
576 Population Prospects 2015 – Data Booklet (ST/ESA/ SER.A/377).
- 577 2. Pimentel, D., Burgess, M. 2014. Environmental and economic costs of the application of  
578 pesticides primarily in the United States. In: Integrated Pest Management. Dordrecht: Springer  
579 Netherlands. pp. 47–71.
- 580 3. Devine, G.J., Furlong, M.J. 2007. Insecticide use: contexts and ecological consequences.  
581 *Agriculture and Human Values*, 24(3): 281–306.
- 582 4. Sanchis, V., Bourguet, D. 2008. *Bacillus thuringiensis*: applications in agriculture and insect  
583 resistance management. A review. *Agronomy for Sustainable Development*, 28(1): 11–20.
- 584 5. WHO report 2007. WHO specifications and evaluations for public health pesticides: *Bacillus*  
585 *thuringiensis* subspecies *israelensis* strain AM65-52. World Health Organization, Geneva.

- 586 6. Baldi, I., Cordier, S., Coumoul, X., Elbaz, A. 2013. Pesticides, effets sur la santé. Expertise  
587 collective. INSERM. Available at: <http://ipubli-inserm.inist.fr/handle/10608/1>.
- 588 7. Gilden, R.C., Huffling, K., Sattler, B. 2010. Pesticides and health risks. *Journal of Obstetric,*  
589 *Gynecologic & Neonatal Nursing*, 39(1): 103–110.
- 590 8. Rizzati, V., Briand, O., Guillou, H., Gamet-Payraastre, L. 2016. Effects of pesticide mixtures in  
591 human and animal models: an update of the recent literature. *Chemico-Biological Interactions*,  
592 254: 231–246.
- 593 9. Lacey, L.A., Grzywacz, D., Shapiro-Ilan, D.I., Frutos, R., Brownbridge, M., Goettel, M.S. 2015.  
594 Insect pathogens as biological control agents: Back to the future. *Journal of Invertebrate*  
595 *Pathology*, 132(C): 1–41.
- 596 10. Adang, M.J., Crickmore, N., Jurat-Fuentes, J.L. 2014. Diversity of *Bacillus thuringiensis* crystal  
597 toxins and mechanism of action. In: Dhadialla, T.S. and Gill, S.S., *Advances in Insect Physiology*  
598 vol. 47, Insect midgut and insecticidal proteins. Oxford Academic Press, pp. 39–87.
- 599 11. Crickmore, N. 2017. *Bacillus thuringiensis* toxin classification. In: Fiuza, L., Polanczyk, R.,  
600 Crickmore, N. (eds) *Bacillus thuringiensis* and *Lysinibacillus sphaericus*. Springer.
- 601 12. WHO report 1999. Guideline specification for bacterial larvicides for public health use. WHO  
602 document WHO/CDS/CPC/WHOPES/99.2. World Health Organization, Geneva.
- 603 13. Bravo, A., Pacheco, S., Gomez, I., Garcia-Gomez B., Onofre, J., Soberon, M. 2017. Insecticidal  
604 proteins from *Bacillus thuringiensis* and their mechanism of action. In: Fiuza, L.M., Polanczyk,  
605 R.A., Crickmore, N. (eds). *Bacillus thuringiensis* and *Lysinibacillus sphaericus*, characterization  
606 and use in the field of biocontrol. pp. 53-66.
- 607 14. Rabinovitch, L., Vivoni, A.M., Machado, V., Knaak, N., Berlitz, D.L., Polanczyk, R.A., Fiuza,  
608 L.M. 2017. *Bacillus thuringiensis* characterization: morphology, physiology, biochemistry,  
609 pathotype, cellular, and molecular aspects. In: Fiuza, L.M., Polanczyk, R.A., Crickmore, N. (eds).  
610 *Bacillus thuringiensis* and *Lysinibacillus sphaericus*, characterization and use in the field of  
611 biocontrol. pp. 1-18.



- 612 15. Palma, L., Muñoz, D., Berry, C., Murillo, J., Caballero, P. 2014. *Bacillus thuringiensis* toxins:  
613 an overview of their biocidal activity. *Toxins*, 6(12): 3296–3325.
- 614 16. Ben-Dov, E., Zaritsky, A., Dahan, E., Barak, Z., Sinai, R., Manasherob, R., Khamraev, A.,  
615 Troitskaya, E., Dubitsky, A., Berezina, N., Margalith, Y. 1997. Extended screening by PCR for  
616 seven cry-group genes from field-collected strains of *Bacillus thuringiensis*. *Applied and*  
617 *Environmental Microbiology*, 63(12): 4883–4890.
- 618 17. Ben-Dov, E., Nissan, G., Pelleg, N., Manasherob, R., Boussiba, S., Zaritsky, A. 1999. Refined,  
619 circular restriction map of the *Bacillus thuringiensis* subsp. *israelensis* plasmid carrying the  
620 mosquito larvicidal genes. *Plasmid*, 42(3): 186-191.
- 621 18. Berry, C., O’Neil, S., Ben-Dov, E., Jones, A.F., Murphy, L., Quail, M.A., Holden, M.T.G.,  
622 Harris, D., Zaritsky, A., Parkhill, J. 2002. Complete sequence and organization of pBtoxis, the  
623 toxin-coding plasmid of *Bacillus thuringiensis* subsp. *israelensis*. *Applied and Environmental*  
624 *Microbiology*, 68(10): 5082-5095.
- 625 19. Bravo, A., Gill, S.S., Soberon, M. 2007. Mode of action of *Bacillus thuringiensis* Cry and Cyt  
626 toxins and their potential for insect control. *Toxicon*, 49: 423-435.
- 627 20. Wei, J., Liang, G., Wang, B., Zhong, F., Chen, L., Khaing, M.M., Zhang, J., Guo, Y., Wu, K.,  
628 Tabashnik, B.E. 2016. Activation of Bt protoxin Cry1Ac in resistant and susceptible cotton  
629 bollworm. *PLoS ONE*, 11(6): e0156560.
- 630 21. Schnepf, E., Crickmore, N., Van Rie, J., Lereclus, D., Baum, J., Feitelson, J., Zeigler, D.R.,  
631 Dean, D.H. 1998. *Bacillus thuringiensis* and its pesticidal crystal proteins. *Microbiology and*  
632 *Molecular Biology Reviews*, 62(3): 775–806.
- 633 22. Bravo, A., Likitvivatanavong, S., Gill, S.S., Soberon, M. 2011. *Bacillus thuringiensis*: a story of  
634 a successful bioinsecticide. *Insect Biochemistry and Molecular Biology*, 41(7): 423–431.
- 635 23. Obata, F., Kitami, M., Inoue, Y., Atsumi, S., Yoshizawa, Y., Sato, R. 2009. Analysis of the  
636 region for receptor binding and triggering of oligomerization on *Bacillus thuringiensis* Cry1Aa  
637 toxin. *FEBS Journal*, 276: 5949-5959.

- 638 24. Caccia, S., Di Lelio, I., La Storia, A., Marinelli, A., Varricchio, P., Franzetti, E., Banyuls, N.,  
639 Tettamanti, G., Casartelli, M., Giordana, B., Ferre, J., Gigliotti, S., Ercolini, D., Pennacchio, F.  
640 2016. Midgut microbiota and host immunocompetence underlie *Bacillus thuringiensis* killing  
641 mechanism. *Proceedings of the National Academy of Sciences of the United States of America*,  
642 113(34): 9486-9491.
- 643 25. Glare, T.R., O'Callaghan, M. 2000. *Bacillus thuringiensis*: Biology, ecology and safety. John  
644 Wiley & Sons, UK. pp. 350.
- 645 26. Rubio-Infante, N., Moreno-Fierros, L. 2016. An overview of the safety and biological effects of  
646 *Bacillus thuringiensis* Cry toxins in mammals. *Journal of Applied Toxicology*, 36: 630-648.
- 647 27. EFSA Panel on Biological Hazards (BIOHAZ) 2016. Risks for public health related to the  
648 presence of *Bacillus cereus* and other *Bacillus* spp. including *Bacillus thuringiensis* in foodstuffs.  
649 *EFSA Journal*, doi: 10.2903/j.efsa.2016.4524.
- 650 28. Amichot, M., Curty, C., Benguettat-Magliano, O., Gallet, A., Wajnberg, E. 2016. Side effects of  
651 *Bacillus thuringiensis* var. *kurstaki* on the hymenopterous parasitic wasp *Trichogramma chilonis*.  
652 *Environmental Science and Pollution Research*, 23: 3097-3103.
- 653 29. Renzi, M.T., Amichot, M., Pauron, D., Tchamitchian, S., Brunet, J.-L., Kretzschmar, A., Maini,  
654 S., Belzunces, L.P. 2016. Chronic toxicity and physiological changes induced in the honey bee  
655 by the exposure to fipronil and *Bacillus thuringiensis* spores alone or combined. *Ecotoxicology*  
656 *and Environmental Safety*, 127: 205-213.
- 657 30. Caquet, T., Roucaute, M., Le Goff, P., Lagadic, L. 2011. Effects of repeated field applications of  
658 two formulations of *Bacillus thuringiensis* var. *israelensis* on non-target saltmarsh invertebrates  
659 in Atlantic coastal wetlands. *Ecotoxicology and Environmental Safety*, 74: 1122-1130.
- 660 31. Duguma, D., Hall, M.W., Rugman-Jones, P., Stouthamer, R., Neufeld, J.D., Walton, W.E. 2015.  
661 Microbial communities and nutrient dynamics in experimental microcosms are altered after the  
662 application of a high dose of *Bti*. *Journal of Applied Ecology*, 52: 763-773.
- 663 32. Lagadic, L., Schäfer, R.B., Roucaute, M., Szöcs, E., Chouin S., de Maupeou, J., Duchet, C.,

- 664 Franquet, E., Le Hunsec, B., Bertrand, C., Fayolle, S., Francès, B., Rozier, Y., Foussadier, R.,  
665 Santoni, J.-B., Lagneau, C. 2016. No association between the use of Bti for mosquito control and  
666 the dynamics of non-target aquatic invertebrates in French coastal and continental wetlands.  
667 *Science of the Total Environment*, 553: 486-494.
- 668 33. Venter, H.J., Bøhn, T. 2016. Interactions between Bt crops and aquatic ecosystems: A review.  
669 *Environmental Toxicology and Chemistry*, 35(12): 2891–2902
- 670 34. van Frankenhuyzen, K. 2017. Specificity and cross-order activity of *Bacillus thuringiensis*  
671 pesticidal proteins. In: Fiuza, L.M., Polanczyk, R.A., Crickmore, N. (eds). *Bacillus thuringiensis*  
672 and *Lysinibacillus sphaericus*, characterization and use in the field of biocontrol. pp. 127-172.
- 673 35. Bizzarri, M.F., Bishop, A.H. 2008. The ecology of *Bacillus thuringiensis* on the phylloplane:  
674 colonization from soil, plasmid transfer, and interaction with larvae of *Pieris brassicae*.  
675 *Microbial Ecology*, 56(1): 133-139.
- 676 36. Raymond, B., Wyres, K.L., Sheppard, S.K., Ellis, R.J., Bonsall, M.B. 2010. Environmental  
677 factors determining the epidemiology and population genetic structure of the *Bacillus cereus*  
678 group in the field. *PloS Pathogens*, 6(5): e1000905.
- 679 37. Hendriksen, N.B., Hansen, B.M. 2002. Long-term survival and germination of *Bacillus*  
680 *thuringiensis* var. *kurstaki* in a field trial. *Canadian Journal of Microbiology*, 48(3): 256–261.
- 681 38. Duchet, C., Tetreau, G., Marie, A., Rey, D., Besnard, G., Perrin, Y., Paris, M., David, J.-P.,  
682 Lagneau, C., Desprès, L. 2014. Persistence and recycling of bioinsecticidal *Bacillus*  
683 *thuringiensis* subsp. *israelensis* spores in contrasting environments: evidence from field  
684 monitoring and laboratory experiments. *Microbial Ecology*, 67(3): 576–586.
- 685 39. Hung, T.P., Truong, L.V., Binh, N.D., Frutos, R., Quiquampoix, H., Staunton, S. 2016a.  
686 Persistence of detectable insecticidal proteins from *Bacillus thuringiensis* (Cry) and toxicity after  
687 adsorption on contrasting soils. *Environmental Pollution*, 208: 318–325.
- 688 40. Hung, T.P., Truong, L.V., Binh, N.D., Frutos, R., Quiquampoix, H., Staunton, S. 2016b. Fate of  
689 insecticidal *Bacillus thuringiensis* Cry protein in soil: differences between purified toxin and

- 690 biopesticide formulation. *Pest Management Science*, 72: 2247–2253.
- 691 41. Enger, K.S., Mitchell, J., Murali, B., Bridsell, D.N., Keim, P., Gurian, P.L., Wagner, D.M. 2018.
- 692 Evaluating the long-term persistence of *Bacillus* spores on common surfaces. *Microbial*
- 693 *Biotechnology*, 56: 3073, 12.
- 694 42. Couch, T.L., 2000. Industrial fermentation and formulation of entomopathogenic bacteria. In:
- 695 Charles, J.-F., Delecluse, A., Nielsen-LeRoux, C. (Eds.), *Entomopathogenic Bacteria: From*
- 696 *Laboratory to Field Application*. Kluwer Academic Publishers, Dordrecht, The Netherlands, pp.
- 697 297–316.43. Brar, S.K., Verma, M., Tyagi, R.D., Valéro, J.R. 2006. Recent advances in
- 698 downstream processing and formulations of *Bacillus thuringiensis* based biopesticides. *Process*
- 699 *Biochemistry*, 41(2): 323–342.
- 700 44. Setlow, P. 2014. Spore resistance properties. *Microbiology Spectrum*, 2(5): TBS-0003-2012.
- 701 45. European Food Safety Authority 2012. Conclusion on the peer review of the pesticide risk
- 702 assessment of the active substance *Bacillus thuringiensis* subsp. *Kurstaki* (strains *ABTS 351*, *PB*
- 703 *54*, *SA 11*, *SA 12*, *EG 2348*). *EFSA Journal*, 10(2): 2540.
- 704 46. Bächli, G. 1999-2008. TaxoDros: the database on the taxonomy of Drosophilidae. Available at:
- 705 <http://www.taxodros.uzh.ch>.
- 706 47. Tennessen, J.M., Thummel, C.S. 2011. Coordinating growth and maturation - Insights from
- 707 *Drosophila*. *Current Biology*, 21(18): R750–757.
- 708 48. Benz, G., Perron, J.M. 1967. The toxic action of *Bacillus thuringiensis* “exotoxin” on
- 709 *Drosophila* reared in yeast-containing and yeast-free media. *Experientia*, 23(10): 871–872.
- 710 49. Saadoun, I., Al-Moman, F., Obeidat, M., Meqdam, M., Elbetieha, A. 2001. Assessment of toxic
- 711 potential of local Jordanian *Bacillus thuringiensis* strains on *Drosophila melanogaster* and *Culex*
- 712 sp (Diptera). *Journal of Applied Microbiology*, 90: 866-872.
- 713 50. Khyami-Horani, H. 2002. Toxicity of *Bacillus thuringiensis* and *B. sphaericus* to laboratory
- 714 populations of *Drosophila melanogaster* (Diptera: Drosophilidae). *Journal Basic Microbiology*,
- 715 42(2): 105-110.

- 716 51. Obeidat, M. 2008. Toxicity of local *Bacillus thuringiensis* isolates against *Drosophila*  
717 *melanogaster*. *World Journal of Agricultural Sciences*, 4(2): 161-167.
- 718 52. Obeidat, M., Khymani-Horani, H. and Al-Momani, F. 2012. Toxicity of *Bacillus thuringiensis*  
719  $\beta$ -exotoxins and  $\delta$ -endotoxins to *Drosophila melanogaster*, *Ephestia kuhniella* and human  
720 erythrocytes. *African Journal of Biotechnology*, 11(46):10504-10512.
- 721 53. Cossentine, J., Robertson, M., Xu, D. 2016. Biological activity of *Bacillus thuringiensis* in  
722 *Drosophila suzukii* (Diptera: Drosophilidae). *Journal of Economic Entomology*, 0(0): 1-8.
- 723 54. Biganski, S., Jehle, J.A., Kleepies, R.G. 2017. *Bacillus thuringiensis* serovar *israelensis* has no  
724 effect on *Drosophila suzukii* Matsumura. *Journal of Applied Entomology*, 142: 33-36.
- 725 55. Haller, S., Romeis, J.X.R., Meissle, M., 2017. Effects of purified or plant-produced Cry proteins  
726 on *Drosophila melanogaster* (Diptera: Drosophilidae) larvae. *Scientific Reports*, 1-11.
- 727 56. Shorrocks, B. 1991. Competition on a divided and ephemeral resource: a cage experiment.  
728 *Biological Journal of the Linnean Society*, 43: 211-220.
- 729 57. Benado, M., Brncic, D. 1994. An eight-year phenological study of a local drosophilid  
730 community in Central Chile. *Journal of Zoological Systematics and Evolutionary Research*, 32:  
731 51-63.
- 732 58. Nunney, L. 1996. The colonization of oranges by the cosmopolitan *Drosophila*. *Oecologia*, 108:  
733 552-561.
- 734 59. Mitsui, H., Kimura, M.T. 2000. Coexistence of drosophilid flies: aggregation, patch size  
735 diversity and parasitism. *Ecological Research*, 15: 93-100.
- 736 60. Withers, P., Allemand, R. 2012. Les drosophiles de la region Rhône-Alpes (Diptera,  
737 Drosophilidae). *Bulletin de la Société entomologique de France*, 117(4) : 473-482.
- 738 61. Zeigler, D.R. 1999. *Bacillus* genetic stock center catalog of strains, 7<sup>th</sup> edition. Part 2: *Bacillus*  
739 *thuringiensis* and *Bacillus cereus*. pp. 58.
- 740 62. Gonzales, J.M.Jr, Brown, B.J., Carlton, B.C. 1982. Transfer of *Bacillus thuringiensis* plasmids  
741 coding for  $\delta$ -endotoxin among strains of *B. thuringiensis* and *B. cereus*. *Proceedings of the*

- 742 *National Academy of Sciences of the United States of America*, 79: 6951-6955.
- 743 63. R Development Core Team 2008. R: A language and environment for statistical computing. R  
744 Foundation for Statistical Computing, Vienna, Austria. ISBN 3-900051-07-0, URL  
745 <http://www.R-project.org>.
- 746 64. Bates, D., Maechler, M., Bolker, B., Walker, S. 2015. Fitting linear mixed-effects models using  
747 lme4. *Journal of Statistical Software*, 67(1): 1-48.
- 748 65. Kosmidis I (2017). *brglm: Bias Reduction in Binary-Response Generalized Linear Models*. R  
749 package version 0.6.1, <http://www.ucl.ac.uk/~ucakiko/software.html>.
- 750 66. Horton, T., Bretz, F., Westfall, P. 2008. Simultaneous inference in general parametric models.  
751 *Biometrical Journal*, 50(3): 346-363.
- 752 67. Therneau, T.M., Grambsch, P.M. 2000. Modeling survival data: extending the Cox model.  
753 Springer, New York, ISBN 0-387-98784-3.
- 754 68. Therneau, T.M. 2015. coxme: Mixed Effects Cox Models. R package version 2.2-5.  
755 <https://CRAN.R-project.org/package=coxme>
- 756 69. Koch, M.S., Ward, J.M., Levine, S.L., Baum, J.A., Vicini, J.L., Hammond, B.G. 2015. The food  
757 and environmental safety of *Bt* crops. *Frontiers in Plant Science*, 6: 283.
- 758 70. Bradberry, S.M., Proudfoot, A.T., Vale, J.A. 2004. Glyphosate poisoning. *Toxicological*  
759 *Reviews*, 23(3): 159-167.
- 760 71. de Souza Machado, A.A., Zarfl, C., Rehse, S., Kloas, W. 2017. Low-dose effects:  
761 nonmonotonic responses for the toxicity of a *Bacillus thuringiensis* biocide to *Daphnia magna*.  
762 *Environmental Science & Technology*, 51: 1679-1686.
- 763 72. Vettori, C., Paffetti, D., Saxena, D., Stotzky, G., Giannini, R. 2003. Persistence of toxins and  
764 cells of *Bacillus thuringiensis* subsp. *kurstaki* introduced in sprays to Sardinia soils. *Soil Biology*  
765 *and Biochemistry*, 35(12): 1635-1642.
- 766 73. Becker, N. 2000. Bacterial control of vector-mosquitoes and black flies. In: Charles, J.-F.,  
767 Delécluse, A., Nielsen-Roux, C. (ed.). Entomopathogenic bacteria: from laboratory to field

- 768 application. Kluwer Academic Publishers. p. 383-398.
- 769 74. van Frankenhuyzen K. 2013. Cross-order and cross-phylum activity of *Bacillus thuringiensis*  
770 pesticidal proteins. *Journal of Invertebrate Pathology*, 114(1): 76–85.
- 771 75. Stevens, T., Song, S., Bruning, J.B., Choo, A., Baxter, S.W. 2017. Expressing a moth abcc2  
772 gene in transgenic *Drosophila* causes susceptibility to Bt Cry1Ac without requiring a cadherin-  
773 like protein receptor. *Insect Biochemistry and Molecular Biology*, 80: 61-70.
- 774 76. George, Z., Crickmore, N. 2012. *Bacillus thuringiensis* applications in agriculture. In: E.  
775 Sansinenea (ed.). *Bacillus thuringiensis* biotechnology. p. 392.
- 776 77. Santos, M., Borash, D.J., Joshi, A., Bounlutay, N., Mueller, L.D. 1997. Density-dependent  
777 natural selection in *Drosophila*: evolution of growth rate and body size. *Evolution*, 51(2): 420-  
778 432.
- 779 78. Nepoux, V., Haag, C.R., Kawecki, T.J. 2010. Effects of inbreeding on aversive learning in  
780 *Drosophila*. *Journal of Evolutionary Biology*, 23: 2333-2345.
- 781 79. Vantaux, A., Ouattarra, I., Lefèvre, T., Dabiré, K.R. 2016. Effects of larvicidal and larval  
782 nutritional stresses on *Anopheles gambiae* development, survival and competence for  
783 *Plasmodium falciparum*. *Parasites & Vectors*, 9: 226.
- 784 80. Moret, Y., Schmid-Hempel, P. 2000. Survival for immunity: the price of immune system  
785 activation for bumblebee workers. *Science*, 290(5494): 1166-1168.
- 786 81. Kutzer, M.A., Armitage, S.A.O. 2016. The effect of diet and time after bacterial infection on  
787 fecundity, resistance, and tolerance in *Drosophila melanogaster*. *Ecology and Evolution*, 6(13):  
788 4229-4242.
- 789 82. Andersen, L.H., Kristensen, T.N., Loeschcke, V., Toft, S., Mayntz, D. 2010. Protein and  
790 carbohydrate composition of larval food affects tolerance to thermal stress and desiccation in  
791 adult *Drosophila melanogaster*. *Journal of Insect Physiology*, 56: 336-340.
- 792 83. Khazaeli, A.A., Curtsinger, J.W. 2000. Genetic analysis of extended lifespan in *Drosophila*  
793 *melanogaster* III. On the relationship between artificially selected and wild stocks. *Genetica*, 109:

794 245-253.

795 84. Rion, S., Kawecki, T.J. 2007. Evolutionary biology of starvation resistance: what we have  
796 learned from *Drosophila*. *Journal of Evolutionary Biology*, 20(5): 1655-1664.

797 85. Burger, J.M.S., Buechel, S.D., Kawecki, T.J. 2010. Dietary restriction affects lifespan but not  
798 cognitive aging in *Drosophila melanogaster*. *Aging Cell*, 9: 327-335.

799 86. Atkinson, W., Shorrocks, B. 1977. Breeding site specificity in the domestic species of  
800 *Drosophila*. *Oecologia*, 29(3): 223-232.

801 87. Walsh, D.B., Bolda, M.P., Goodhue, R.E., Dreves, A.J., Lee, J., Bruck, D.J., Walton, V.M.,  
802 O'Neal, S.D., Zalom, F.G. 2011. *Drosophila suzukii* (Diptera: Drosophilidae): invasive pest of  
803 ripening soft fruit expanding its geographic range and damage potential. *Journal of Integrated*  
804 *Pest Management*, 2(1): DOI: 10.1603/IPM10010.

805 88. Delbac, L., Rusch, A., Rouzes, R., Ravidat, M.-L., Launes, S., Thiéry, D. 2014. *Drosophila*  
806 *suzukii* est-elle une menace pour la vigne? *Phytoma*, 679 : 16-21.

807 89. Poyet, M., Eslin, P., Héraude, M., Le Roux, V., Prévost, G., Givert, P., Chabrierie, O. 2014.  
808 Invasive host for invasive pest: when the Asiatic cherry fly (*Drosophila suzukii*) meets the  
809 American black cherry (*Prunus serotina*) in Europe. *Agricultural and Forest Entomology*, 1-9,  
810 DOI: 10.1111/afe012052.

811 90. Poulin, B., Lefebvre, G., Paz, L. 2010. Red flag for green spray: adverse trophic effects of *Bti*  
812 on breeding birds. *Journal of Applied Ecology*, 47: 884-889.



813 **Table 1.** Results of statistical analyses to assess the effect of the dose of formulation/spore  
814 production and its interaction with the treatment, the larval instar, the experiment, the sex, the fly  
815 strain and the fly species when appropriate. See figures for *post hoc* comparisons of the doses with  
816 the control dose.  
817

| Source of variation/Data                                                                                                                       | $\chi^2$ / Deviance | d.f. | P value         |
|------------------------------------------------------------------------------------------------------------------------------------------------|---------------------|------|-----------------|
| <b>Development on <i>Btk</i> Delfin<sup>®</sup> A, <i>Btk</i> 4D22, <i>Bti</i> Vectobac<sup>®</sup>, <i>Bacillus subtilis</i></b>              |                     |      |                 |
| <i>Emergence rate</i>                                                                                                                          |                     |      |                 |
| Dose × Treatment                                                                                                                               | 285.7               | 20   | < <b>0.0001</b> |
| Dose for each treatment:                                                                                                                       |                     |      |                 |
| - Delfin <sup>®</sup> A                                                                                                                        | 237.5               | 6    | < <b>0.0001</b> |
| - 4D22                                                                                                                                         | 7.0                 | 7    | 0.40            |
| - Vectobac <sup>®</sup>                                                                                                                        | 165.8               | 5    | < <b>0.0001</b> |
| - <i>B. subtilis</i>                                                                                                                           | 1.9                 | 6    | 0.93            |
| <i>Developmental time</i>                                                                                                                      |                     |      |                 |
| Dose × Treatment                                                                                                                               | 220.8               | 19   | < <b>0.0001</b> |
| Dose for each treatment:                                                                                                                       |                     |      |                 |
| - Delfin <sup>®</sup> A                                                                                                                        | 68.8                | 6    | < <b>0.0001</b> |
| - 4D22                                                                                                                                         | 16.08               | 7    | <b>0.024</b>    |
| - Vectobac <sup>®</sup>                                                                                                                        | 37.5                | 6    | < <b>0.0001</b> |
| - <i>B. subtilis</i>                                                                                                                           | 13.5                | 7    | 0.060           |
| <b>Development on <i>Btk</i> Delfin<sup>®</sup> B and Scutello DF (dose effect)</b>                                                            |                     |      |                 |
| <i>Emergence rate</i>                                                                                                                          |                     |      |                 |
| - Delfin <sup>®</sup> B                                                                                                                        | 151.2               | 2    | < <b>0.0001</b> |
| - Scutello DF                                                                                                                                  | 105.1               | 2    | < <b>0.0001</b> |
| <i>Developmental time</i>                                                                                                                      |                     |      |                 |
| - Delfin <sup>®</sup> B                                                                                                                        | 2.5                 | 1    | 0.12            |
| - Scutello DF                                                                                                                                  | 30.9                | 2    | < <b>0.0001</b> |
| <b>Role of formulation components in the development alterations (dialysis)</b>                                                                |                     |      |                 |
| Dose effect                                                                                                                                    |                     |      |                 |
| <i>Emergence rate</i>                                                                                                                          | 459.8               | 3    | < <b>0.0001</b> |
| <i>Developmental time</i>                                                                                                                      | 13.7                | 2    | <b>0.0011</b>   |
| <b>Survival of larval stages on Delfin<sup>®</sup> A</b>                                                                                       |                     |      |                 |
| <i>Cumulative survival</i>                                                                                                                     |                     |      |                 |
| Dose × Larval instar                                                                                                                           | 16.2                | 5    | <b>0.0063</b>   |
| Dose for each instar:                                                                                                                          |                     |      |                 |
| - late 1 <sup>st</sup> instar                                                                                                                  | 87.4                | 5    | < <b>0.0001</b> |
| - late 2 <sup>nd</sup> instar                                                                                                                  | 25.7                | 5    | <b>0.0001</b>   |
| <i>24-hour survival</i>                                                                                                                        |                     |      |                 |
| Dose × Larval instar                                                                                                                           | 15.9                | 5    | <b>0.007</b>    |
| Dose for each instar:                                                                                                                          |                     |      |                 |
| - late 1 <sup>st</sup> instar                                                                                                                  | 55.9                | 5    | < <b>0.0001</b> |
| - late 2 <sup>nd</sup> instar                                                                                                                  | 3.76                | 5    | 0.58            |
| <b>Adult fitness-related traits after development on Delfin<sup>®</sup> A</b>                                                                  |                     |      |                 |
| <i>Longevity</i>                                                                                                                               |                     |      |                 |
| Experiment                                                                                                                                     | 20.1                | 1    | < <b>0.0001</b> |
| <i>- 1<sup>st</sup> experiment:</i>                                                                                                            |                     |      |                 |
| Dose                                                                                                                                           | 12.3                | 3    | <b>0.0065</b>   |
| Sex                                                                                                                                            | 35.0                | 1    | < <b>0.0001</b> |
| (e <sup>β</sup> coefficient males vs females ± se: 0.55 ± 0.16)                                                                                |                     |      |                 |
| Dose × Sex                                                                                                                                     | 20.4                | 3    | <b>0.00014</b>  |
| <i>Sexes analyzed separately</i>                                                                                                               |                     |      |                 |
| - females                                                                                                                                      | 12.0                | 3    | <b>0.0073</b>   |
| (e <sup>β</sup> coefficients vs control ± se: 5×10 <sup>6</sup> : 1.05 ± 0.17, 5×10 <sup>7</sup> : 0.71 ± 0.16, 10 <sup>8</sup> : 0.60 ± 0.21) |                     |      |                 |
| - males                                                                                                                                        | 20.4                | 3    | <b>0.00014</b>  |
| (e <sup>β</sup> coefficients vs control ± se: 5×10 <sup>6</sup> : 0.80 ± 0.16, 5×10 <sup>7</sup> : 0.66 ± 0.16, 10 <sup>8</sup> : 1.53 ± 0.18) |                     |      |                 |

818

819

| Source of variation/Data                                                                                                                             | $\chi^2$ / Deviance | d.f. | P value            |
|------------------------------------------------------------------------------------------------------------------------------------------------------|---------------------|------|--------------------|
| <b>Adult fitness-related traits after development on Delfin<sup>®</sup> A</b>                                                                        |                     |      |                    |
| <u>- 2<sup>nd</sup> experiment:</u>                                                                                                                  |                     |      |                    |
| Dose                                                                                                                                                 | 16.5                | 3    | <b>0.00090</b>     |
| Sex                                                                                                                                                  | 31.5                | 1    | <b>&lt; 0.0001</b> |
| (e <sup>β</sup> coefficient males vs females ± se: 0.45 ± 0.22)                                                                                      |                     |      |                    |
| Dose × Sex                                                                                                                                           | 0.69                | 3    | 0.88               |
| <u>Sexes analyzed separately</u>                                                                                                                     |                     |      |                    |
| - females                                                                                                                                            | 13.2                | 3    | <b>0.0043</b>      |
| (e <sup>β</sup> coefficients doses vs control ± se: 5×10 <sup>6</sup> : 0.92 ± 0.22, 5×10 <sup>7</sup> : 0.63 ± 0.21, 10 <sup>8</sup> : 0.51 ± 0.21) |                     |      |                    |
| - males                                                                                                                                              | 7.01                | 3    | <b>0.072</b>       |
| (e <sup>β</sup> coefficients doses vs control ± se: 5×10 <sup>6</sup> : 1.02 ± 0.22, 5×10 <sup>7</sup> : 0.70 ± 0.22, 10 <sup>8</sup> : 0.64 ± 0.22) |                     |      |                    |
| <u>Total numbers of offspring</u>                                                                                                                    |                     |      |                    |
| Dose × Experiment                                                                                                                                    | 28.1                | 3    | <b>&lt; 0.0001</b> |
| <u>Dose for each experiment:</u>                                                                                                                     |                     |      |                    |
| - 1 <sup>st</sup> experiment                                                                                                                         | 26.3                | 3    | <b>&lt; 0.0001</b> |
| - 2 <sup>nd</sup> experiment                                                                                                                         | 4.1                 | 3    | 0.25               |
| <b>Development of other strains of <i>D. melanogaster</i> on Delfin<sup>®</sup> A (including Canton S)</b>                                           |                     |      |                    |
| <u>Emergence rate</u>                                                                                                                                |                     |      |                    |
| Dose × Fly strain                                                                                                                                    | 105.5               | 15   | <b>&lt; 0.0001</b> |
| Dose for each fly strain:                                                                                                                            |                     |      |                    |
| - Canton S                                                                                                                                           | 588.6               | 5    | <b>&lt; 0.0001</b> |
| - Nasrallah                                                                                                                                          | 745.3               | 5    | <b>&lt; 0.0001</b> |
| - Sefra                                                                                                                                              | 900.7               | 5    | <b>&lt; 0.0001</b> |
| - YW1118                                                                                                                                             | 636.9               | 5    | <b>&lt; 0.0001</b> |
| <u>Developmental time</u>                                                                                                                            |                     |      |                    |
| Dose × Fly strain                                                                                                                                    | 9.3                 | 12   | 0.68               |
| Dose for each fly strain:                                                                                                                            |                     |      |                    |
| - Canton S                                                                                                                                           | 40.3                | 4    | <b>&lt; 0.0001</b> |
| - Nasrallah                                                                                                                                          | 18.0                | 4    | <b>0.0012</b>      |
| - Sefra                                                                                                                                              | 27.2                | 4    | <b>&lt; 0.0001</b> |
| - YW1118                                                                                                                                             | 28.9                | 4    | <b>&lt; 0.0001</b> |
| <b>Development of other <i>Drosophila</i> species on Delfin<sup>®</sup> A</b>                                                                        |                     |      |                    |
| <u>Emergence rate</u>                                                                                                                                |                     |      |                    |
| Dose × Fly species                                                                                                                                   | 538.2               | 30   | <b>&lt; 0.0001</b> |
| Dose for each species:                                                                                                                               |                     |      |                    |
| - <i>D. simulans</i>                                                                                                                                 | 461.0               | 5    | <b>&lt; 0.0001</b> |
| - <i>D. yakuba</i>                                                                                                                                   | 750.7               | 5    | <b>&lt; 0.0001</b> |
| - <i>D. hydei</i>                                                                                                                                    | 596.8               | 5    | <b>&lt; 0.0001</b> |
| - <i>D. immigrans</i>                                                                                                                                | 726.3               | 5    | <b>&lt; 0.0001</b> |
| - <i>D. subobscura</i>                                                                                                                               | 729.6               | 5    | <b>&lt; 0.0001</b> |
| - <i>D. sukukii</i>                                                                                                                                  | 725.0               | 5    | <b>&lt; 0.0001</b> |
| - <i>D. busckii</i>                                                                                                                                  | 586.0               | 5    | <b>&lt; 0.0001</b> |
| <u>Developmental time</u>                                                                                                                            |                     |      |                    |
| Dose × Fly species                                                                                                                                   | 59.9                | 22   | <b>&lt; 0.0001</b> |
| Dose for each species:                                                                                                                               |                     |      |                    |
| - <i>D. simulans</i>                                                                                                                                 | 25.9                | 4    | <b>&lt; 0.0001</b> |
| - <i>D. yakuba</i>                                                                                                                                   | 34.7                | 4    | <b>&lt; 0.0001</b> |
| - <i>D. hydei</i>                                                                                                                                    | 11.5                | 4    | <b>0.022</b>       |
| - <i>D. immigrans</i>                                                                                                                                | 6.01                | 3    | 0.11               |
| - <i>D. subobscura</i>                                                                                                                               | 68.8                | 4    | <b>&lt; 0.0001</b> |
| - <i>D. sukukii</i>                                                                                                                                  | 11.7                | 3    | <b>0.0085</b>      |
| - <i>D. busckii</i>                                                                                                                                  | 58.8                | 4    | <b>&lt; 0.0001</b> |

821 **Figure legends**

822 **Figure 1. Development of *D. melanogaster* Canton S flies on *Btk* and *Bti* commercial**  
823 **formulations. (a)** Emergence rate (mean  $\pm$  s.e.m.) and **(b)** developmental time (mean  $\pm$  s.e.m.) of  
824 20 initial eggs on increasing doses of *Btk* Delfin<sup>®</sup> A (red triangles), the Cry-free *Btk* 4D22 (open  
825 lozenges), the mosquito-targeting *Bti* Vectobac<sup>®</sup> (green squares), and the non-pathogenic *Bacillus*  
826 *subtilis* (light grey circles). For Vectobac<sup>®</sup> and *B. subtilis*,  $N = 4-7$  per dose; for Delfin<sup>®</sup> A and *Btk*  
827 4D22,  $N = 9-12$  for the control,  $N = 3$  for  $5 \cdot 10^5$  and  $10^9$ ,  $N = 4-9$  for  $10^6$ ,  $N = 7-14$  from  $5 \cdot 10^6$  to  $10^8$ .  
828 **(c)** Emergence rate (mean  $\pm$  s.e.m.) and **(d)** developmental time (mean  $\pm$  s.e.m.) on increasing doses  
829 of the two *Btk* formulations Delfin<sup>®</sup> B (dark red circles) and Scutello DF (orange squares).  $N = 4$   
830 replicates of 20 eggs per dose and formulation, except for controls and  $10^8$  CFU/g of Delfin<sup>®</sup> B (9-  
831 10 replicates of 20 eggs). Results of *post hoc* comparisons of each dose to the control:  $\cdot 0.05 < P < 0.1$ ;  
832  $* 0.01 < P < 0.05$ ;  $** 0.001 < P < 0.01$ ;  $*** P < 0.001$ . **(e)** Immunoblotting with an anti-Cry1A polyclonal  
833 antibody on proteins from a suspension of laboratory-produced spores of Cry-free *Btk* 4D22, the  
834 three *Btk* formulations Delfin<sup>®</sup> A, B, Scutello DF, and a suspension of laboratory-produced Cry1A  
835 toxins. Red asterisks indicate the Cry protoxins ( $\sim 130$  kDa) and the activated fragments ( $\sim 60$  kDa  
836 and  $\sim 70$  kDa).

837

838 **Figure 2. Survival of *D. melanogaster* Canton S larval stages on increasing doses of *Btk***  
839 **Delfin<sup>®</sup> A. (a)** Proportion of surviving larvae (mean  $\pm$  s.e.m.) upon *Btk* exposure from the egg to  
840 late 1<sup>st</sup> instar (open lozenges) and late 2<sup>nd</sup> instar (black triangles). **(b)** Proportion of surviving larvae  
841 (mean  $\pm$  s.e.m.) upon 24-hour *Btk* exposure of early 1<sup>st</sup> instar larvae (open lozenges) and 2<sup>nd</sup> instar  
842 larvae (black triangles).  $N = 5-7$  replicates of 20 individuals per dose. Results of *post hoc*  
843 comparisons of each dose with the control:  $* 0.01 < P < 0.05$ ;  $** 0.001 < P < 0.01$ ;  $*** P < 0.001$ .

844

845

846 **Figure 3. Fitness-related traits of adults (longevity and total offspring number) after**  
847 **development on *Btk Delfin*<sup>®</sup> A.** (a, d) Female longevity (mean survival fraction over time  $\pm$  s.e.m.),  
848 (b, e) Male longevity (mean  $\pm$  s.e.m.), and (c, f) total offspring number (mean  $\pm$  s.e.m.), measured  
849 on individuals that developed without *Btk* (blue items) and on  $5 \times 10^6$  CFU/g of *Btk Delfin*<sup>®</sup> A (green  
850 items),  $5 \times 10^7$  CFU/g (red items), and  $10^8$  CFU/g (dark red items). Data from 2 experiments (a-c,  
851 experiment 1; d-f, experiment 2). For each trait,  $N = 3$ -5 replicates of 15 males and 15 females per  
852 dose in experiment 1,  $N = 3$  replicates of 15 males and 15 females in experiment 2. Results of *post*  
853 *hoc* comparisons of each dose with the control: \*  $0.01 < P < 0.05$ ; \*\*  $0.001 < P < 0.01$ ; \*\*\*  $P < 0.001$ .

854

855 **Figure 4. Development of four *D. melanogaster* strains on increasing doses of *Btk Delfin*<sup>®</sup> A.** (a)  
856 Emergence rate (mean  $\pm$  s.e.m.), (b) Developmental time (mean  $\pm$  s.e.m.) of the strains Canton S  
857 (blue lozenges), Nasrallah (yellow triangles), Sefra (green squares), and YW1118 (red circles).  $N =$   
858 4 groups of 50 eggs per dose and fly strain for each trait. Results of *post hoc* comparisons of each  
859 dose to the control:  $\cdot 0.05 < P < 0.1$ ; \*  $0.01 < P < 0.05$ ; \*\*  $0.001 < P < 0.01$ ; \*\*\*  $P < 0.001$ .

860

861 **Figure 5. Emergence rate of seven *Drosophila* species on increasing doses of *Btk Delfin*<sup>®</sup> A.**  
862 Mean emergence rate ( $\pm$  s.e.m.).  $N = 4$  replicates of 50 eggs per dose for *D. simulans*, *D. yakuba*, *D.*  
863 *subobscura*, and *D. busckii*,  $N = 4$  replicates of 30 eggs per dose for *D. hydei*, *D. suzukii*, and *D.*  
864 *immigrans*. Results of *post hoc* comparisons of each dose with the control:  $\cdot 0.05 < P < 0.1$ ; \*  
865  $0.01 < P < 0.05$ ; \*\*  $0.001 < P < 0.01$ ; \*\*\*  $P < 0.001$ .

866

867 **Figure 6. Developmental time of seven *Drosophila* species on increasing doses of *Btk Delfin*<sup>®</sup> A.**  
868 Mean developmental time ( $\pm$  s.e.m.).  $N = 4$  replicates of 50 eggs per dose for *D. simulans*, *D.*  
869 *yakuba*, *D. subobscura*, and *D. busckii*,  $N = 4$  replicates of 30 eggs per dose for *D. hydei*, *D. suzukii*,  
870 and *D. immigrans*. Results of *post hoc* comparisons of each dose with the control: \*  $0.01 < P < 0.05$ ;  
871 \*\*  $0.001 < P < 0.01$ ; \*\*\*  $P < 0.001$ .

872 **Figure 7. Evaluation of the role of small molecular weight components of *Btk* Delfin<sup>®</sup> A**  
873 **(dialysis; membrane cut-off: 8-10 kDa) in the altered development of *D. melanogaster* Canton**  
874 **S. (a) Emergence rate (mean  $\pm$  s.e.m.) and (b) developmental time (mean  $\pm$  s.e.m.) on increasing**  
875 **doses of dialyzed Delfin<sup>®</sup> A.  $N = 3$  experiments of 4 replicates with 20 eggs per dose for the**  
876 **emergence rate,  $N = 2$  experiments of 4 replicates per dose for the developmental time. Results of**  
877 ***post hoc* comparisons of each dose with the control:  $\cdot$   $0.05 < P < 0.1$ ;  $*$   $0.01 < P < 0.05$ ;  $**$**   
878  **$0.001 < P < 0.01$ ;  $***$   $P < 0.001$ . (c) Anti-Cry1A probed immunoblot of non-dialyzed (ND) and**  
879 **dialyzed (D) suspensions showing the decrease in the amount of  $\sim$  130 kDa protoxins and the**  
880 **increase in that of  $\sim$  60/70 kDa activated toxins after dialysis.**

**Figure 1**

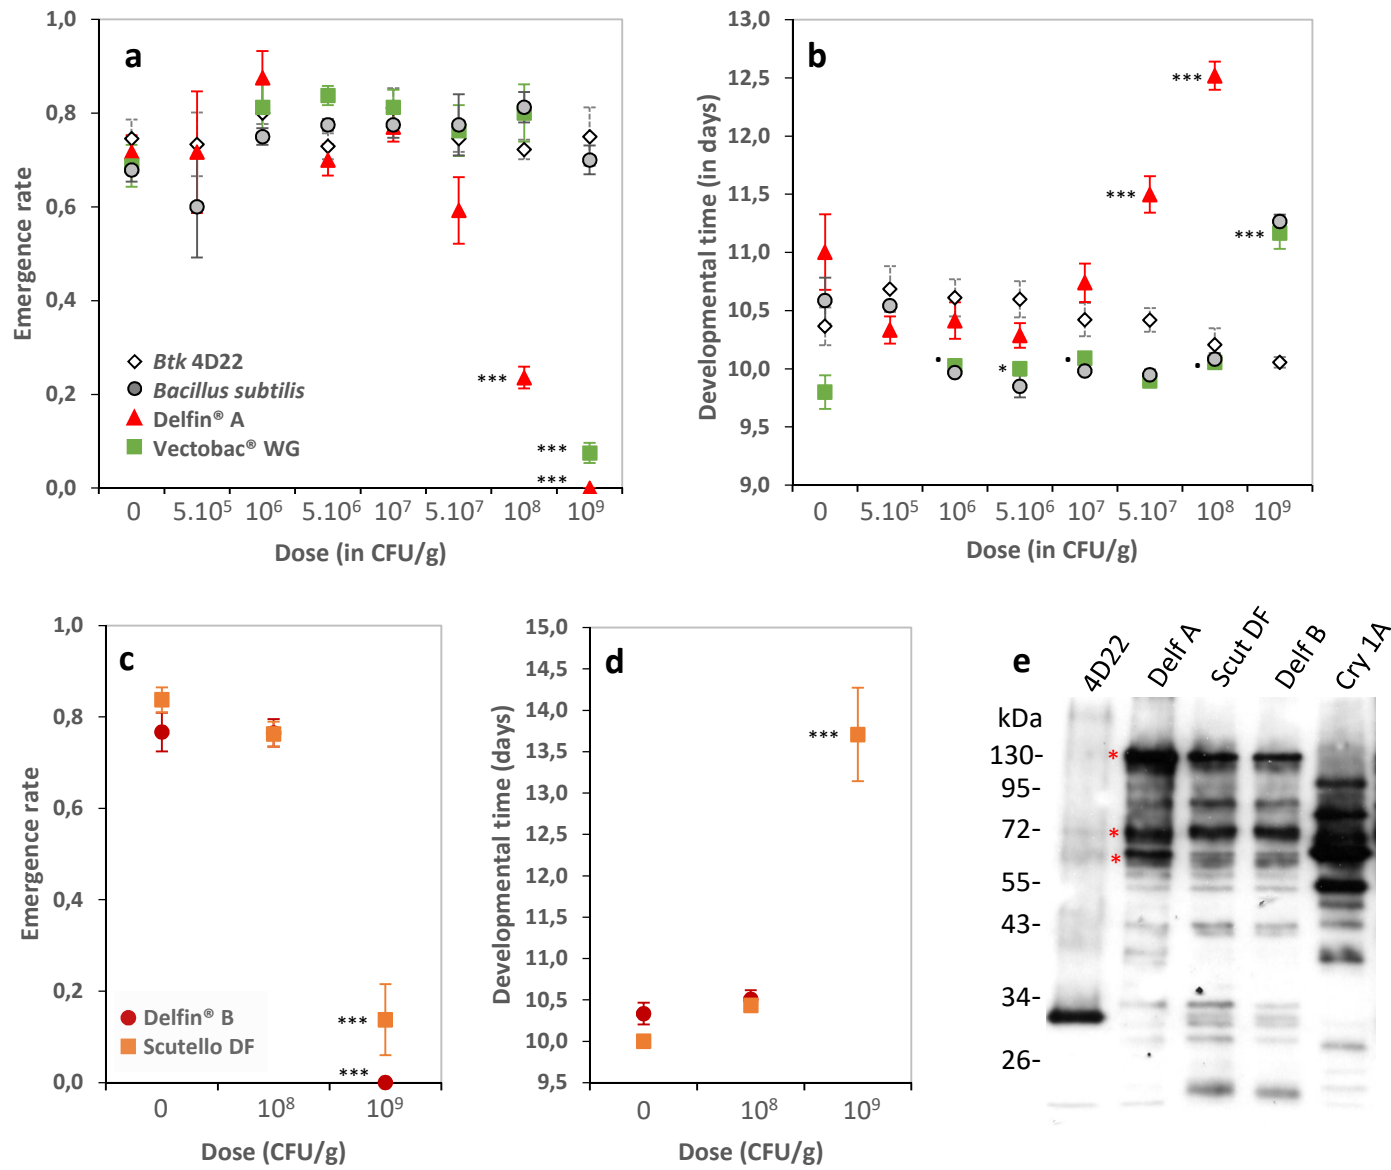

Figure 2

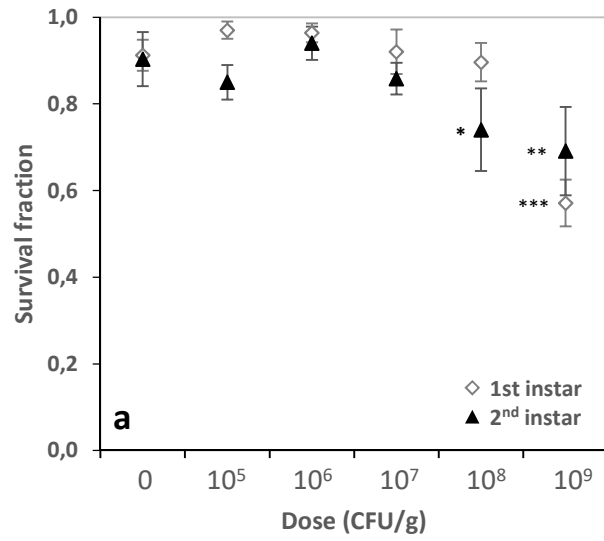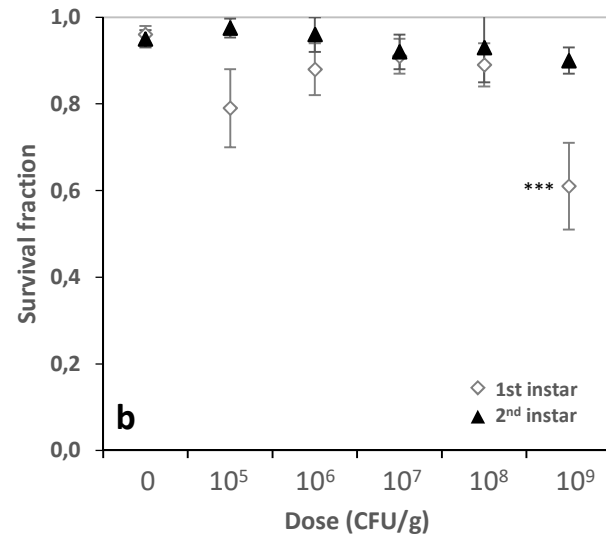



Figure 3

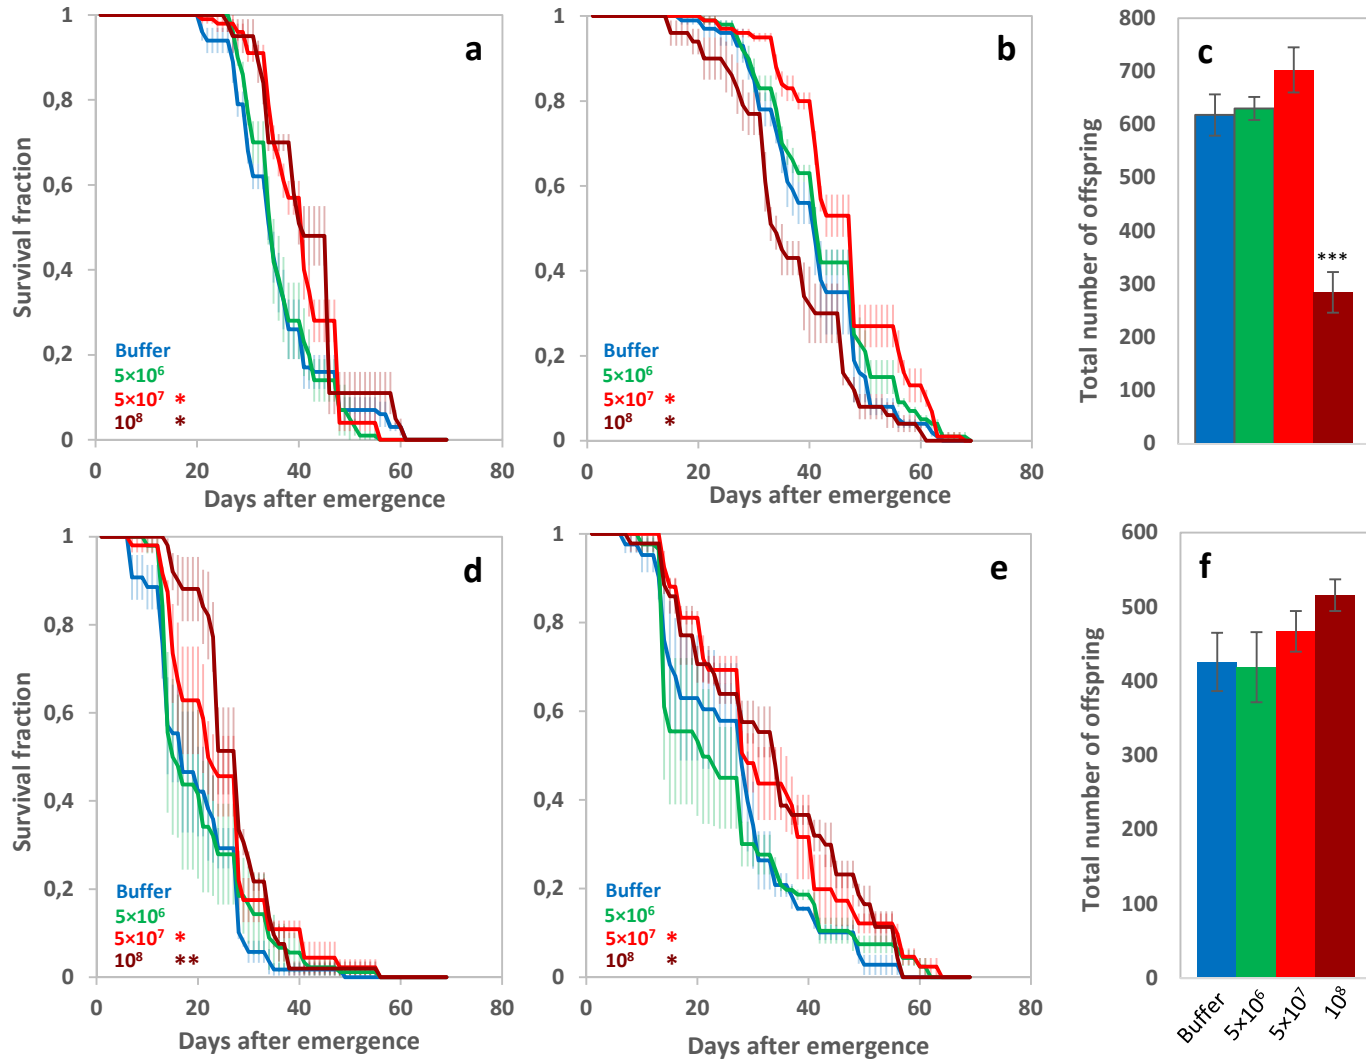

Figure 4

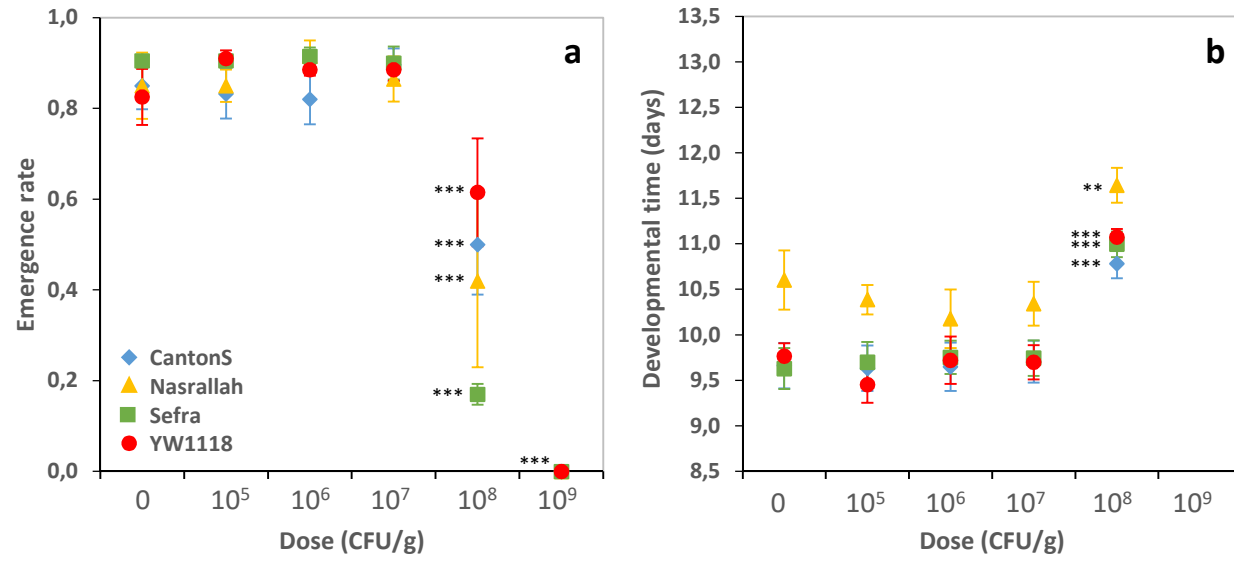

Figure 5

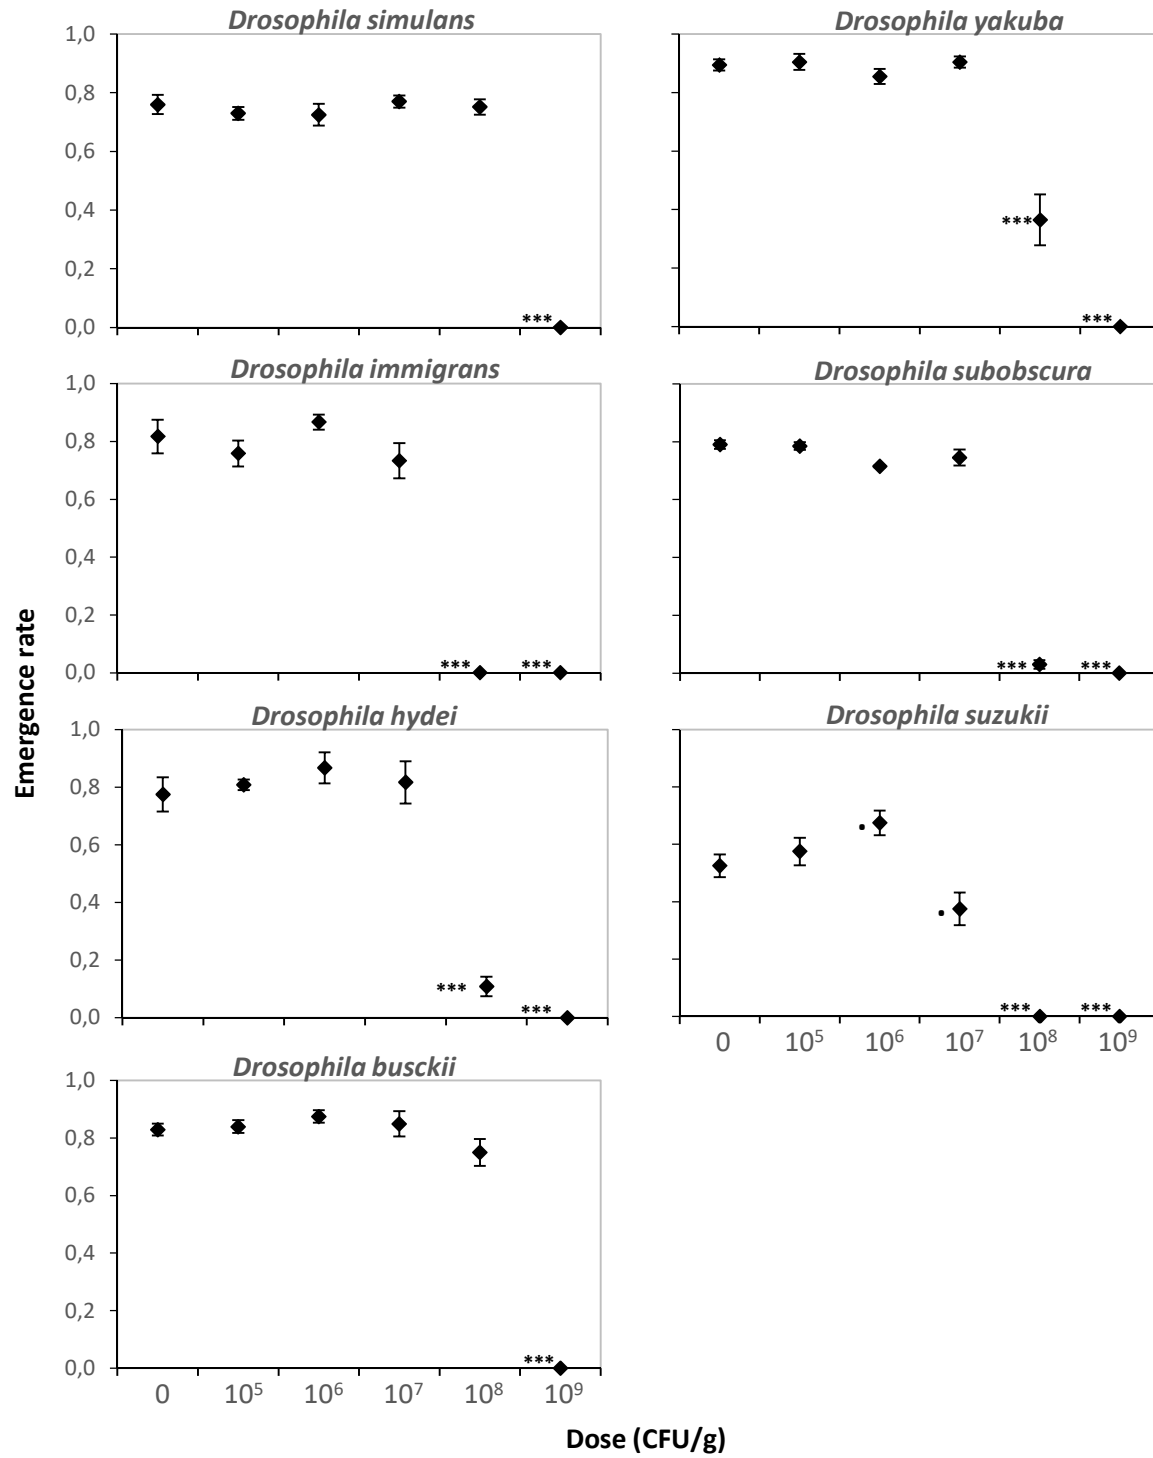

Figure 6

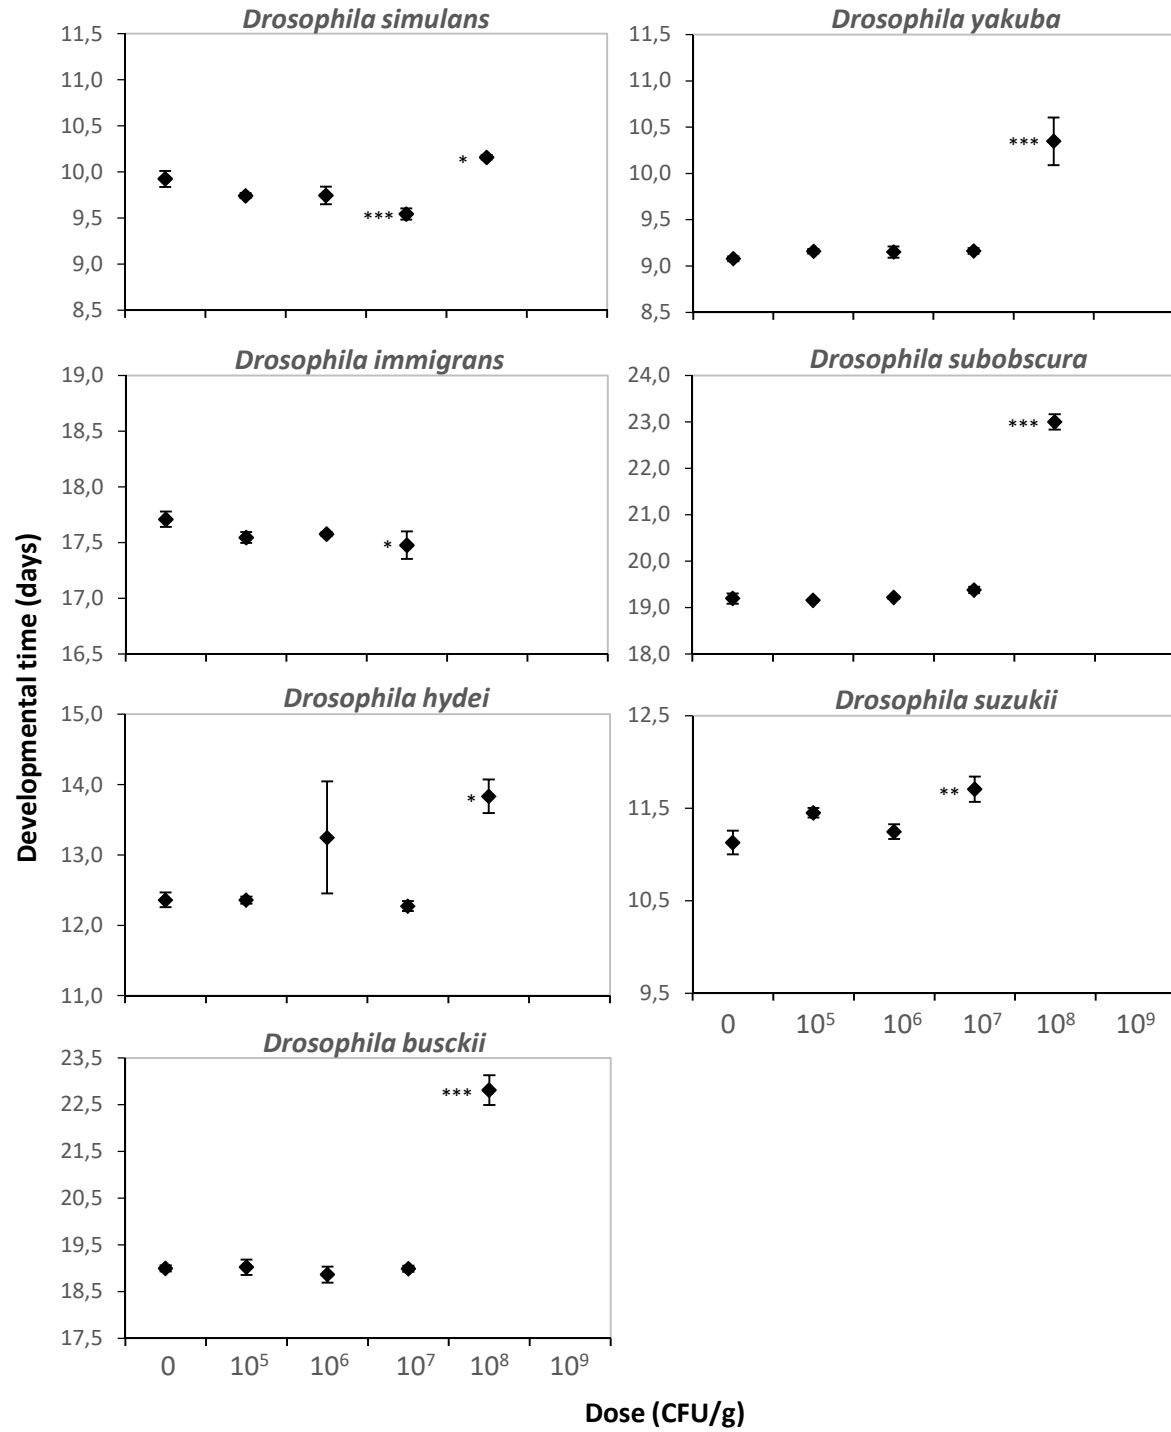

Figure 7

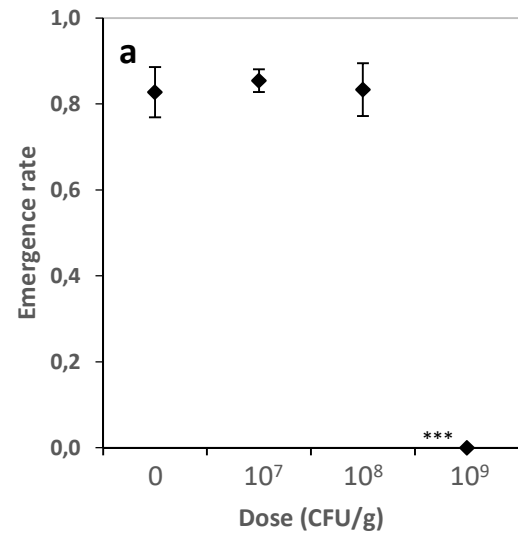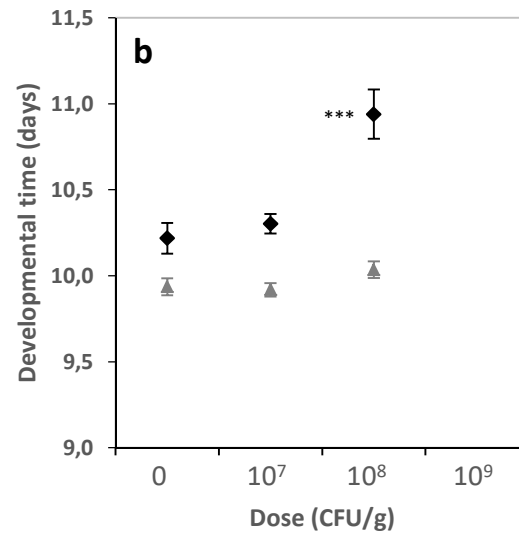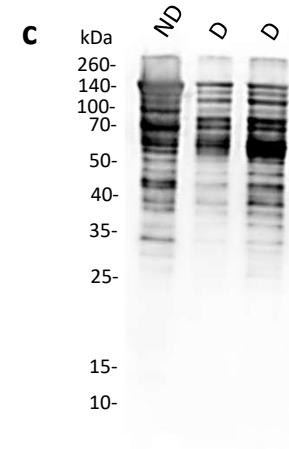

Source: https://www.biorxiv.org/content/10.1101/541847v3.full.pdf
